# Supplementary material for: HOMESIDE: home-based family caregiver-delivered music and reading interventions for people living with dementia: protocol of a randomised controlled trial
Source: PubMed Central journal article supplement — BMJ Open. 2019 Nov 19;9(11):e031332. doi: 10.1136/bmjopen-2019-031332 (PMC6886975; doi:10.1136/bmjopen-2019-031332), 2019-11-19
Supplement: bmjopen-2019-031332.draft_revisions.pdf [file bmjopen-2019-031332.draft_revisions.pdf]

# BMJ Open

BMJ Open is committed to open peer review. As part of this commitment we make the peer review history of every article we publish publicly available.

When an article is published we post the peer reviewers' comments and the authors' responses online. We also post the versions of the paper that were used during peer review. These are the versions that the peer review comments apply to.

The versions of the paper that follow are the versions that were submitted during the peer review process. They are not the versions of record or the final published versions. They should not be cited or distributed as the published version of this manuscript.

BMJ Open is an open access journal and the full, final, typeset and author-corrected version of record of the manuscript is available on our site with no access controls, subscription charges or pay-per-view fees (<http://bmjopen.bmj.com>).

If you have any questions on BMJ Open's open peer review process please email [info.bmjopen@bmj.com](mailto:info.bmjopen@bmj.com)

# BMJ Open

## HOMESIDE: A home-based family caregiver-delivered music intervention for people living with dementia: protocol of a randomised controlled trial.

|                               |                                                                                                                                                                                                                                                                                                                                                                                                                                                                                                                                                                                                                                                                                                                                                                                                                                                                                                                                                                                                                                                                                                                                                                                        |
|-------------------------------|----------------------------------------------------------------------------------------------------------------------------------------------------------------------------------------------------------------------------------------------------------------------------------------------------------------------------------------------------------------------------------------------------------------------------------------------------------------------------------------------------------------------------------------------------------------------------------------------------------------------------------------------------------------------------------------------------------------------------------------------------------------------------------------------------------------------------------------------------------------------------------------------------------------------------------------------------------------------------------------------------------------------------------------------------------------------------------------------------------------------------------------------------------------------------------------|
| Journal:                      | <i>BMJ Open</i>                                                                                                                                                                                                                                                                                                                                                                                                                                                                                                                                                                                                                                                                                                                                                                                                                                                                                                                                                                                                                                                                                                                                                                        |
| Manuscript ID                 | bmjopen-2019-031332                                                                                                                                                                                                                                                                                                                                                                                                                                                                                                                                                                                                                                                                                                                                                                                                                                                                                                                                                                                                                                                                                                                                                                    |
| Article Type:                 | Protocol                                                                                                                                                                                                                                                                                                                                                                                                                                                                                                                                                                                                                                                                                                                                                                                                                                                                                                                                                                                                                                                                                                                                                                               |
| Date Submitted by the Author: | 29-Apr-2019                                                                                                                                                                                                                                                                                                                                                                                                                                                                                                                                                                                                                                                                                                                                                                                                                                                                                                                                                                                                                                                                                                                                                                            |
| Complete List of Authors:     | Baker, Felicity; The University of Melbourne<br>Bloska, Jodie; Anglia Ruskin University, Music Therapy<br>Braat, Sabine ; University of Melbourne School of Population and Global Health, Centre for Epidemiology and Biostatistics<br>Bukowska, Anna; University of Physical Education<br>Clark, Imogen; Melbourne Conservatorium of Music<br>Hsu, Ming; Anglia Ruskin University<br>Kvamme, Tone; Norwegian Academy of Music, Music Therapy<br>Lautenschlager, Nicola; University of Melbourne, Academic Unit of Psychiatry of Old Age, Department of Psychiatry, Royal Melbourne Hospital, Royal Park Campus; Royal Melbourne Hospital Royal Park Campus, NorthWestern Mental Health, Melbourne Health<br>Lee, Young-Eun; Melbourne Conservatorium of Music<br>Smrokowska-Reichmann, Agnieszka; University of Physical Education<br>Sousa, Tanara; The University of Melbourne School of Population and Global Health<br>Stensaeth, Karette; Norwegian Academy of Music<br>Tamplin, Jeanette; Melbourne Conservatorium of Music<br>Wosch, Thomas; Hochschule fur angewandte Wissenschaften Wurzburg-Schweinfurt<br>Odell-Miller, Helen; Anglia Ruskin University - Cambridge Campus |
| Keywords:                     | music therapy, Dementia < NEUROLOGY, caregivers, home-based interventions, randomised controlled trial, behavioural and psychological symptoms of dementia                                                                                                                                                                                                                                                                                                                                                                                                                                                                                                                                                                                                                                                                                                                                                                                                                                                                                                                                                                                                                             |
|                               |                                                                                                                                                                                                                                                                                                                                                                                                                                                                                                                                                                                                                                                                                                                                                                                                                                                                                                                                                                                                                                                                                                                                                                                        |

SCHOLARONE™  
Manuscripts

1  
2 Title: HOMESIDE: A home-based family caregiver-delivered music intervention for people living  
3 with dementia: protocol of a randomised controlled trial.  
4

5 Baker, F.A.<sup>1,2</sup>, Bloska, J.<sup>3</sup>, Braat, S.<sup>4</sup>, Bukowska, A.<sup>5</sup>, Clark, I.N.<sup>1</sup>, Hsu, M. H.<sup>3</sup>, Kvamme, T.<sup>2</sup>,  
6 Lautenschlager, N.T.<sup>5,6</sup>, Lee, Y-E.C.<sup>1</sup>, Smrokowska-Reichmann, A.<sup>2</sup>, Sousa, T.<sup>4</sup>, Stensæth, K.<sup>2</sup>, Tamplin, J.<sup>1</sup>,  
7 Wosch, T.<sup>7</sup>, Odell-Miller, H.<sup>3</sup>  
8

9 <sup>1</sup> Creative Arts and Music Therapy Research Unit, The University of Melbourne  
10

11 <sup>2</sup> Centre for Music and Health, Norwegian Academy of Music  
12

13 <sup>3</sup> Cambridge Institute for Music Therapy Research, Anglia Ruskin University  
14

15 <sup>4</sup> School of Population and Global Health, University of Melbourne  
16

17 <sup>5</sup> Department of Psychiatry, Royal Melbourne Hospital, University of Melbourne,  
18

19 <sup>6</sup> Royal Melbourne Hospital Royal Park Campus, NorthWestern Mental Health, Melbourne Health  
20  
21 Parkville, VIC, AUS  
22

23 <sup>7</sup> Music Therapy Department, Hochschule für angewandte Wissenschaften Würzburg-Schweinfurt  
24  
25 Würzburg  
26  
27  
28  
29  
30

31 Corresponding Author: Felicity Anne Baker, 234 St Kilda Rd, The University of Melbourne,  
32  
33 Southbank, Melbourne, AUSTRALIA 3006, [felicity.baker@unimelb.edu.au](mailto:felicity.baker@unimelb.edu.au), Ph: +61 3 9035 3057,  
34  
35 fax: +61 3 8344 5346  
36  
37  
38  
39  
40

41 Author Contributions: FB took the initiative for the study; FB, HOM, TW, KS, AW, JB developed  
42  
43 the concept and design; SB developed the statistical analysis plan and TS designed the health  
44  
45 economics plan. All authors helped to revise the concept and design. FB drafted the manuscript; all  
46  
47 authors revised the manuscript for important intellectual content. All authors approved the final  
48  
49 version of the manuscript.  
50  
51

52  
53  
54 **Funding:** This work was supported by the Joint Programs for Neurodegenerative Diseases (JPND)  
55  
56 which includes joint funding from the National Health and Medical Research Council  
57  
58 (APP1169867), Norwegian Research Council, Bundesministerium für Bildung und Forschung  
59  
60

1  
2 Germany (01ED1901), and The National Centre for Research and Development, Poland, and  
3  
4 Alzheimer's Society, UK (grant no. 462).  
5

6  
7 **Completing Interests:** None declared  
8

9 **Trial Registration Numbers:** ACTRN12618001799246p; Clinical Trials.gov NCT03907748  
10  
11

12  
13  
14 **Word count: 5293** (excluding title page, abstract, references, figures)  
15  
16

17  
18  
19 **Abstract:**  
20

21  
22  
23  
24 *Introduction:* Pharmacological interventions to address behavioural and psychological symptoms of  
25 dementia (BPSD) can have undesirable side effects, therefore non-pharmacological approaches to managing  
26 symptoms may be preferable. Past studies show that music therapy can reduce BPSD, and other studies have  
27 explored how formal caregivers use music in their caring roles. However, no randomised study has examined  
28 the effects on BPSD of music interventions delivered by informal caregivers (CGs) in the home setting. Our  
29 project aims to address the need for improved informal care by training cohabitating family CGs to implement  
30 music interventions that target BPSD, and the quality of life (QoL) and wellbeing of people with dementia  
31 (PwD), and of CGs.  
32

33  
34  
35 *Methods and analysis:* A large international 3-arm parallel-group randomized controlled will recruit a sample  
36 of 495 dyads from Australia, Germany, UK, Poland and Norway. Dyads will be randomised equally to standard  
37 care (SC), a home-based music program plus SC, or a home-based reading program plus SC for 12 weeks. The  
38 primary outcome is BPSD of PwD (measured using the Neuropsychiatric Index). Secondary outcomes will  
39 examine relationship quality between CG and PwD, depression, resilience, competence, QoL for CG, and QoL  
40 in PwD. Outcomes will be collected at baseline, at the end of the 12-week intervention and at 6-months post  
41 randomisation. Resource Utilization in Dementia will be used to collect economic data across the life of the  
42 intervention and at 6-month follow-up. We hypothesize that the music program plus SC will generate better  
43 results than SC alone (primary comparison), or the reading program plus SC (secondary comparison).  
44  
45  
46  
47  
48  
49  
50  
51  
52  
53  
54  
55  
56  
57  
58  
59  
60

1  
2 *Ethics and dissemination:* Ethical approval will be obtained for all countries. Results will be presented at  
3  
4 national and international conferences and published in scientific journals and disseminated to consumer and  
5  
6 carer representatives and the community.  
7  
8  
9

### 10 11 **Strengths and Limitations of this study** 12 13 14

- 15 • As a multinational trial, this study will provide internationally generalisable results concerning the  
16 effects of music intervention delivered by trained family caregivers on the behavioural and  
17 psychological symptoms of people living with dementia.  
18  
19
- 20 • Based on pilot data, this trial will have adequate power to determine the effects on the person with  
21 dementia.  
22  
23
- 24 • The trial will determine whether caregiver-delivered music intervention improve quality of life for  
25 and wellbeing of the carer reduce healthcare costs for the caregiver and society.  
26  
27
- 28 • A comprehensive set of core outcomes will be measured, including long-term effects in key  
29 variables, with assessor blinding.  
30  
31
- 32 • As participants cannot be blinded, a limitation of the study is that they may provide biased responses  
33 on their self-report measures.  
34  
35  
36  
37  
38  
39  
40  
41  
42  
43  
44  
45  
46  
47  
48  
49  
50  
51  
52  
53  
54  
55  
56  
57  
58  
59  
60

## BACKGROUND

Family caregivers (CG) play a vital role in providing care for a person living with dementia (PwD) in the home-setting,[1]. This personalised care not only directly benefits the PwD by keeping them at home in a familiar environment but represents a significant economic contribution to society. CGs often find caregiving satisfying and rewarding, however the task of managing the challenging behavioural and psychological symptoms of dementia (BPSD) can override their capacity to cope, leading to negative physical and mental health including fatigue, depression, burnout, and illness,[2-3]. A deterioration in CG wellbeing may have a negative flow-on effect on the wellbeing of the PwD. A negative spiral may develop until the CG can no longer sustain the caring role, and the PwD moves into residential care earlier than desired.

The 2015 global cost of dementia was estimated to be US\$818 billion, and this figure will continue to increase as the number of people with dementia rises,[1]. Nearly 85% of costs are related to family and social, rather than medical care. With this increase and the escalating costs of care, it is time-critical that CG-directed home-based interventions are developed and tested. The 2017 Lancet Commission on Dementia,[1] suggests that pharmacological treatment of BPSD should be restricted to those with very severe symptoms and highlights music therapy as a non-pharmacological intervention that reduces BPSD (p.30).

Systematic reviews indicate that the majority of CG-directed interventions adopted cognitive-behavioural or psychoeducational approaches to address CG coping, depression and BPSD management,[4-5]. Adherence to programs was poor because CGs could not commit to the regular program attendance requirements,[4-5].<sup>4,5</sup> Drawing on social exchange theory, apathy and other BPSD lead to diminished reciprocity between CG and PwD, creating imbalances in the relationship,[6]. Therefore, the convenience of a home-based CG-delivered program that can manage BPSD and address relationship reciprocity is more likely to be adhered to, and more effective in promoting both PwD and CG wellbeing.

Music therapy is a registered psychosocial National Health Service (NHS in the UK) intervention that meets the current recommendations for addressing the individual needs of those with dementia. HOMESIDE (HOME-based caregiver-delivered music intervention for people living with dementia) uses a purposefully developed music intervention (MI) (described later) informed by previous meta-analyses that demonstrate

1  
2 the effectiveness of music therapy in reducing BPSD,[9-11]. The MI is a translation of the research evidence  
3  
4 to a home-care context and, instead of being delivered directly by qualified music therapists, they will train  
5  
6 CGs to deliver the MI. The MI incorporates Kitwood's model of personhood for PwD,[12], which is  
7  
8 essential to effective dementia care and underpins the philosophy of the 2018 Alzheimer's Association  
9  
10 Dementia Care Practice Recommendations. The person-centred dementia care embedded in the MI  
11  
12 emphasizes communication and relationships, recognising that dementia is best understood as an interplay  
13  
14 between neurological impairment and psychosocial factors (e.g. health, individual psychology), and the  
15  
16 environment,[13].  
17

18  
19  
20  
21 Small scale studies that have tested the effectiveness of MI training programs for informal and formal CGs  
22  
23 have had positive findings to date. Results of a cluster RCT with formal CGs showed the MI to be a  
24  
25 practicable and acceptable intervention, with PwD showing treatment-related improvements, and staff  
26  
27 reporting enhanced skills in caregiving,[7]. Although based on a small sample (N=17), large effects in BPSD  
28  
29 (Cohen's  $d=2.32$ ) were found between standard care (SC) and MI from baseline to 7-months. A home-based  
30  
31 feasibility RCT determined acceptability of the MI, assessed burden associated with delivering the MI, and  
32  
33 tested appropriateness of the measures,[14]. BPSD scores decreased from baseline to post-test in the MI  
34  
35 group but increased in the SC group and mixed results were shown for the comparative reading group.  
36

37  
38  
39  
40 The conceptual framework underpinning the MI intervention incorporates the responses of the PwD, the  
41  
42 ensuing moment to moment interaction between the PwD and the CG, and the CGs' responses to the PwD  
43  
44 and moments of interaction (Figure 1). The MI is grounded in the established knowledge that music-induced  
45  
46 emotions and memories are often retained in PwD because of the relative preservation of medial frontal and  
47  
48 limbic areas,[9, 15]. MI are effective when the music selected for use is chosen by the PwD (or CG),[9, 11].  
49  
50 When music facilitates moment to moment interactions, emotional and social engagement, and  
51  
52 autobiographical recall, imbalances in reciprocity are diminished. CGs' positive experience of seeing "the  
53  
54 person behind the dementia" via this music-induced response evokes CG experiences of pleasure, feelings of  
55  
56 competence in the CG, and fosters their resilience and coping. Ultimately the enhanced wellbeing of CGs  
57  
58 will lead to more effective care and better wellbeing outcomes for both CGs and PwD (Figure 1).  
59  
60

<<INSERT FIGURE 1 ABOUT HERE

**Figure 1. Mechanisms of action underpinning the music intervention>>**

The comparative conditions in this trial are SC only (control) and a reading intervention plus SC (RI, active control). The RI was included because studies have shown preliminary evidence that reading to and with PwD can have positive impacts on BPSD,[19-21]. We anticipate that the RI will lead to a small positive effect but that MI is expected to be superior as music has been shown to be a social connector and a trigger of autobiographical recall, is non-reliant on intact verbal comprehension or expression, and can be used to regulate emotion and behaviour,[7, 9-11, 15-18].

### **Trial Design**

A large, pragmatic, blinded, international 3-arm parallel-group RCT design is planned with a 1:1:1 allocation ratio. Cohabiting dyads where one member of each dyad has a diagnosis of dementia will be randomised to one of three conditions: 1) MI plus SC; 2) RI plus SC; and 3) SC only (Figure 2). CG in MI and RI groups will receive a 2-hour training session on how to deliver the MI or RI and will then engage the PwD in a 5x weekly CG-directed home-program for 12 weeks. Two additional training sessions will be provided at 3-weeks and 6-weeks post allocation. Fifteen-minute fortnightly phone calls will be scheduled to support the CG, and encourage adherence to the protocol. Data will be collected at baseline and at the end of the 12-week intervention, and at 3-month follow-up (6-months post-randomization). The SC group will not receive any training sessions. This trial is framed as a superiority trial where we hypothesise that the MI will be superior to SC (primary) and RI plus SC (secondary) regarding BPSD of PwD at 12-weeks post-randomisation.

<<INSERT FIGURE 2 ABOUT HERE

**Figure 2. HOMESIDE illustration of study design >>**

### **Objectives**

The primary aim is to demonstrate the effectiveness of the 12-week HOMESIDE MI plus SC on the short-term BPSD at the end of intervention of PwD living at home and being cared for by a cohabiting CG compared to SC (primary), and to evaluate the effectiveness of MI plus SC compared to RI plus SC (secondary). Other secondary objectives are as follows:



- Evaluate the maintenance of the effect of the MI plus SC on longer-term (6 months post-randomization) BPSD compared to SC and RI plus SC.
- Evaluate the effectiveness of the MI plus SC on short- and long-term levels of depression and quality of life of PwD compared to SC and RI plus SC.
- Evaluate the effectiveness of the MI plus SC on short- and long-term levels of depression, resilience, sense of competence, and quality of life of the CG compared to SC and RI plus SC.
- Evaluate the effectiveness of the MI plus SC on the short- and long-term perceived quality of the relationship between PwD and CG compared to SC and RI plus SC.
- Compare the cost-effectiveness of a CG-delivered MI plus SC on PwD and CG outcomes compared to SC and RI plus SC, using quality of life for both PwD and CG.

## METHODS AND ANALYSIS

### Participants

The trial will be conducted in people's homes located in metropolitan cities in Australia, Germany, Poland, Norway, and the United Kingdom.

Inclusion criteria:

- dyads (cohabiting) who are close in relationship and where one member has a diagnosis of dementia (Alzheimer's Disease [AD], Frontotemporal Dementia, Vascular Dementia [VD], Lewy Body Disease, or mixed dementia) as determined by a clinician experienced in diagnosing dementia,[8].
- dyads where the PwD has a Neuropsychiatric Inventory-Questionnaire (NPI-Q) Score of  $\geq 6$ . There will be no restrictions on including PwD with mild cognitive impairment (MMSE scores  $\leq 24$ ) as research indicates that NPI-Q scores  $\geq 6$  occur in PwD who have high Mini Mental State Examination Scores,[22].

Exclusion criteria:

- dyads where the CG employs paid carers for more than 5 hours per day on at least 5 days per week.
- There will be no further exclusions.

### Interventions

1  
2 *Music Intervention.* Dyads randomly allocated to the MI will receive a 2-hour home-based MI training session  
3  
4 that aims to engage the PwD during and following the MI. A music therapist will instruct the CG on methods  
5  
6 and strategies for using music to assist the PwD to become calmer (if agitated) or more energised (if apathetic).  
7  
8 CGs will be instructed on how to choose music and engage the PwD in effective and respectful discussions  
9  
10 with the aim of evoking autobiographical memories and sharing meaningful experiences,[23]. Strategies to  
11  
12 engage PwD and create opportunities for meaningful dialogue with the PwD will be provided, as well as  
13  
14 training CGs to notice the PwD's positive and negative responses to music. The activities to be taught  
15  
16 comprise: a) singing familiar/preferred songs followed by CG-facilitated discussions about the meaning of the  
17  
18 songs for the dyad, the PwD, and significant others, and any associated memories,[16, 24]; b) movement to  
19  
20 music (e.g. upper body and arms imitating familiar dance movements to music) to assist in regulating  
21  
22 arousal,[11]; c) playing instruments (or using household items to make rhythmic sounds) while listening to  
23  
24 music; and d) listening to familiar/preferred relaxing or enlivening music dependent upon BPSD present at the  
25  
26 time to assist in regulating arousal,[16]. CGs are then instructed to deliver the MI at least 5x per week for  
27  
28 approximately 30 mins over a 12-week period. After each MI session, they will diarise their experiences,  
29  
30 including documenting which activities were used, session time and duration, and any positive or negative  
31  
32 responses during and after the session. Such data (number of times per week, average duration, activities  
33  
34 adopted) will be used to monitor and improve adherence to the protocol. At 3-weeks and 6-weeks post  
35  
36 allocation, the MI trainer will return to the dyad's home for a second and third training session (Figure 2).  
37  
38 These sessions aim to further extend CG knowledge and skills, troubleshoot any issues, and improve protocol  
39  
40 adherence. Fortnightly phone conversations with CGs will be used to support the CG and remind them to  
41  
42 complete the diaries (to mitigate risk and maximise participant engagement, retention, and protocol adherence).  
43  
44  
45  
46  
47

48 *Reading Intervention (active control).* Dyads randomly allocated to the RI group will receive a 2-hour RI  
49  
50 instruction session which aims to engage the PwD during and following the RI. The reading activities to be  
51  
52 taught are based on RI methods commonly used with PwD including: a) CG reading aloud to PwD; b) PwD  
53  
54 reading aloud (or reciting poems, prayers, prose, short stories, fairy tales, when unable to read) to CG; and c)  
55  
56 discussion of the text and personal responses,[19-21]. Strategies to engage the PwD and create opportunities for  
57  
58 meaningful dialogue with the PwD will be provided as well as guidance on selecting reading material  
59  
60 accessible to the PwD's level of cognitive impairment. CGs are then instructed to deliver RI at least 5x per

1  
2 week for 30 mins over 12-weeks and diarise their reading activities to record activity and adherence. Diaries  
3  
4 will serve as a mechanism to monitor adherence to the protocol. At 3-weeks and 6-weeks post allocation, as  
5  
6 per the MI condition, the RI trainers will return to the dyad's home for a second and third training session  
7  
8 with the intention of further extending CG knowledge and skills and to monitor and improve intervention  
9  
10 protocol adherence. Fortnightly phone conversations with CGs will be used to support the CG and remind  
11  
12 them to complete the diaries (to mitigate risk of noncompletion). Like the MI condition, phone calls also aim  
13  
14 to maximise participant engagement, retention, and protocol adherence.  
15  
16

17  
18  
19 *Standard Care.* Dyads randomly allocated to this condition will not be trained in either MI or RI but will be  
20  
21 instructed to care for the PwD in their usual manner.  
22  
23

24  
25 *Discontinuing or Modifying Interventions.* Where there is a significant deterioration in the health of the PwD  
26  
27 and/or the CG that leads to hospital admission or care home admission, the MI or RI will be discontinued. If  
28  
29 there is a change in primary CG partway through the study, the dyad will be withdrawn from the study.  
30  
31

32  
33 *Training and assessment of fidelity.* Given the MI and RI will be delivered in five different countries with  
34  
35 different healthcare philosophies and practices, a careful plan for fidelity of the study design, treatment  
36  
37 integrity, treatment differentiation, treatment receipt, and treatment enactment will be developed. A  
38  
39 standardised manual for MI and RI has been developed and agreed upon by all countries prior to  
40  
41 implementation. Fidelity in this study is complex as it will involve assessing fidelity of the MI and RI  
42  
43 training session, but also fidelity of the CG-directed program. Delivery of MI and RI training by research  
44  
45 staff will be videorecorded and a randomised selection of 20% of recordings from every country will be  
46  
47 reviewed by members of the research team and cross-checked with the MI and RI protocol manuals using a  
48  
49 customised fidelity checklist. Individualised supervision and monitoring of intervention trainers will be  
50  
51 employed to minimise "drift" in trainer differences and control for differences in trainer styles. CG diaries  
52  
53 will be used to determine whether the MI and RI protocols have been adhered to and the success of treatment  
54  
55 enactment.  
56  
57  
58  
59  
60

## Outcomes

1  
2 At baseline, demographic data (age, gender, and dyad history) of both CG and PwD will be collected as well  
3  
4 as diagnostic information of PwD.  
5

6 Where possible, core outcomes ([www.comet-initiative.org](http://www.comet-initiative.org)) for psychosocial intervention research in  
7  
8 dementia care were selected,[25]. For the PwD, the following measures were selected:  
9

- 10 • Behavioural and Psychological Symptoms of Dementia - The NPI-Q is the most highly regarded and  
11 used measure for determining the severity of BPSD in clinical trials. The 12-item scale is used to assess  
12 the behaviour of PwD across 12 domains of commonly displayed BPSD. The scale has been translated  
13 into more than 40 languages, has been cross-validated against the NPI as the gold standard ( $r=0.73$ ) and  
14 has demonstrated good validity (sensitivity = 74.1%, specificity = 79.5%), internal reliability ( $\alpha= 0.783$ )  
15 and excellent test-retest reliability ( $r = 0.99$ ),[26-27]. Total severity scores range from 0 to 36; higher  
16 values are indicative of higher severity. Distress scores range from 0 to 60; higher values represent  
17 higher levels of distress.  
18
- 19 • Depression – The Montgomery Asberg Depression Rating Scale,[28] (MADRS) will be used to assess  
20 the severity of depression. The 10-item scale with each item's scores ranging from 0 (no symptoms) –6  
21 (severe symptoms) is determined by an interview with the PwD and/or proxy. Total score ranges from 0  
22 to 60 with higher scores indicating more severe depression. MADRS has been found to have good  
23 constructive validity, internal reliability ( $\alpha= 0.84$ ), and test-retest reliability (ICC=0.78). The scale has  
24 been widely used in clinical trials,[28].  
25
- 26 • Quality of Life (QoL) – The QoL of PwD will be determined by administering the Quality of Life-  
27 Alzheimer's Disease (QoL-AD),[29] scale. The QoL-AD is recommended by the COS,[25] for use in  
28 clinical trials. It is a simple 13-item self-report measure, which is rated on a 4-point scale, within the  
29 structure of a verbally delivered interview. Total scores range from 13 (no quality of life) to 52  
30 (excellent quality of life in all areas). Studies indicate that the measure can demonstrated sensitivity to  
31 psychosocial intervention, correlates with health-utility measures,[30], has excellent interrater reliability  
32 ( $\kappa > 0.70$ ) and internal consistency ( $\alpha = 0.82$ ). The QoL-AD is reliable when used with people with  
33 MMSE scores of  $\geq 10$ . Both a proxy and a self-report will be collected at the 3-timepoints. If the PwD is  
34 able to complete the MMSE at all time points, then their response will be included in the analysis. If  
35 not, then the proxy version at all time points will be used.  
36  
37  
38  
39  
40  
41  
42  
43  
44  
45  
46  
47  
48  
49  
50  
51  
52  
53  
54  
55  
56  
57  
58  
59  
60

- 1  
2  
3  
4  
5  
6  
7  
8  
9  
10  
11  
12  
13  
14  
15  
16  
17  
18  
19  
20  
21  
22  
23
- Cognition - The Mini-Mental State Examination (MMSE) will be administered pre and post intervention (Time 1 and Time 2) to monitor any change in the PwD's cognition and to examine the relationship between cognitive decline, BPSD, depression and response to different conditions. The MMSE is a 30-point questionnaire used to estimate the severity and progression of cognitive impairment and to follow the course of cognitive changes in an individual over time,[31]. The MMSE tests for orientation, attention, memory, language and visual-spatial skills. It is reliable and valid for both diagnosis and longitudinal assessment. Higher scores indicate better cognitive capacity with scores of 24-30 indicating no cognitive impairment; 19-23 indicating mild cognitive impairment; 10-18 indicating moderate cognitive impairment; and scores <10 indicating severe cognitive impairment.

24 For the CG, the following measures were selected:

- 25  
26  
27  
28  
29  
30  
31  
32  
33  
34  
35  
36  
37  
38  
39  
40  
41  
42  
43  
44  
45  
46  
47  
48  
49  
50  
51  
52  
53  
54  
55  
56  
57  
58  
59  
60
- Symptoms of depression – CG depression will be measured using the Patient Health Questionnaire–9 (PHQ-9),[32]. The 9-item questionnaire asks the participant about how often they experience the descriptors over the last 2 weeks. Each item is scored from 0 (not at all) to 3 (nearly every day). Total scores range from 0 to 27. The PHQ–9 has comparable sensitivity and specificity to other depression measures; high internal reliability ( $\alpha = 0.89$ ), and test-retest reliability ( $r = 0.84$ ).
  - Resilience – CG resilience will be measured using the 14-item Resilience Scale (RS-14),[33]. Total scores range from 14 to 98, with higher scores indicative of higher resilience. The measure has been tested and has good concurrent validity, good internal reliability ( $\alpha = 0.8 - 0.90$ ), good construct validity, test-retest reliability ( $r = 0.67$  to  $0.84$ ) and has been translated into 36 languages,[34].
  - Competence - CG competence will be measured using the Short Sense of Competence Questionnaire (SSCQ),[35]. The 7-items cover 3 main domains; self-reported feelings about how the caregiver role impacts the CG's personal life, satisfaction with their performance as a CG, and their satisfaction with how the PwD responds to the CG. Total scores ranged from 7 to 35 with higher scores indicative of a stronger sense of competence. The measure has been cross-validated with the longer 35-item standard Sense of Competence Questionnaire ( $r = 0.88$ ) and has been shown to have high reliability (Cronbach's  $\alpha = 0.76$ ).

- 1  
2  
3  
4  
5  
6  
7  
8  
9  
10  
11  
12  
13  
14  
15  
16  
17  
18  
19  
20  
21  
22  
23  
24  
25  
26  
27  
28  
29  
30  
31
- CG Quality of Life – QoL of the CG will be assessed using the Assessment of Quality of Life-6D instrument (AQoL-6D),[35] Each item asks participants to describe their situation over the past week by ticking the box (from 4 to 6 choices) that best reflects their situation. The psychometric property testing found the instrument to be reliable and and valid, and has greater sensitivity to the psychosocial dimensions of QoL than other utility instruments,[36-37].
  - Relationship quality – CG perception quality of the CG and PwD relationship will be captured by asking the CG to complete the Quality of Caregiver-Patient Relationship (QCPR),[38]. This 14-item measure aims to capture the strength of the quality of relationship between the PwD and CG, from the CG's perspective. Total score range from 14 to 70, with higher scores indicating a higher quality relationship. The measure has demonstrated acceptable internal consistency ( $\alpha = 0.82$ ) and concurrent validity.
  - Adherence will be measured through CG completed diaries. CGs are deemed adherent to the protocol if they have provided >2 sessions of MI or RI per week, for at least 30minutes in total.

32 To evaluate the cost-effectiveness of MI compared to RI and SC on PwD and CG, the outcomes will be  
33 measured using:  
34

- 35  
36  
37  
38  
39  
40  
41  
42  
43  
44  
45  
46  
47  
48  
49  
50  
51  
52  
53  
54  
55  
56  
57  
58  
59  
60
- Quality Adjusted Life-Years – The EuroQol instrument (EQ-5D-5L),[39] is a generic quality of life measure that is internationally used to determine the quality-adjusted life-years (QALYs) and used for clinical and economic appraisal,[39]. The measure is not cognitively demanding and quick to complete. Scores from the five items are not combined arithmetically but using preference weights which arrive at an overall quality of life score. These range from lower than 0 (worse than death) to 1 (best possible). CGs will complete the measure as a proxy for the PwD and for their own health status,[25, 41-43].
  - Resource Utilization in Dementia (RUD) - The RUD is a standardized instrument for resource use data collection in dementia, designed to collect data from formal and informal care across different countries. The RUD assesses resource use of both PwD and CG, including time expended in different daily tasks, and consists of baseline and a follow-up assessment,[44].

<<INSERT FIGURE 3 ABOUT HERE

**Figure 3. Schedule of enrolment, interventions, and assessments >>****Sample size**

A total of 165 dyads in each arm of the study, or 495 in total, are needed to detect a difference of 3-points in NPI-Q total severity score (primary outcome) between the MI plus SC and SC arm (primary comparison) at 12-weeks (primary time point). This assumes 90% power, a two-tailed significance level of 5%, equal standard deviation (SD, 7.5 points) in the groups, no correlation between baseline and 12 weeks (conservative), and 20% attrition. A 3-point change from baseline in NPI-Q total severity score is considered a clinically meaningful difference,[45]. A conservative SD of 7.5 points is based on that observed in 1026 community-living participants across eight European countries with mild to severe dementia (SD 5.9 to 6.5 points),[46-47]. A conservative drop-out proportion (e.g. withdrawn by CG, physician, or death) of 20% is based on a reported 5.6% (95% CI [1.8%, 12.6%]) drop-out at 3 months in 89 in-patients with mild to moderate dementia in Finland participating in a three-arm RCT of singing, music, or usual care,[24].

**Recruitment**

Randomisation will aim to be distributed equally across five countries (Australia, United Kingdom, Norway, Germany, and Poland) to support between-country analyses. Participants will be recruited through established partner organisations in each country who coordinate CG support groups. Staff from the partner organisations will introduce the trial to potential participants and invite them to participate in the study. They will be given an information sheet explaining the main aspects of the trial and provided with contact details of the research team who will be available to answer further questions.

**Randomization, Allocation Concealment, and Blinding**

The randomization schedule will be computer-generated by an independent statistician and allocation will be carried out through a centralised randomization service. Stratified block permuted randomization will be used for each country, so that treatment balance within country is achieved. Dyads who meet the inclusion criteria and none of the exclusion criteria will be randomized 1:1:1 into MI, RI, or SC. Randomization will occur after the eligibility checking, informed consent, and baseline assessment have been completed. The study

1  
2 coordinator in each country will be informed of the allocation and will inform dyads of their group allocation  
3  
4 by post, phone, or email.  
5

6  
7 Participant dyads cannot be fully blinded due to the active nature of the interventions however, we will avoid  
8  
9 publicizing our hypothesis that MI may be superior to RI. Plain language statements and consent forms will  
10  
11 use neutral wording to maintain equipoise and to avoid expectancy effects. Blinded assessors will collect  
12  
13 participants' data at baseline, post-intervention, and follow-up. Diaries will be returned in sealed envelopes  
14  
15 to minimise risk of assessors becoming unblinded. The success of assessor blinding will be checked  
16  
17 following the collection of follow-up data for each dyad by asking each of the assessors whether they  
18  
19 inadvertently discovered the dyad's allocation. The independent statistician will not reveal the allocation  
20  
21 codes to any of the study team except for the study coordinators of each country in charge of group  
22  
23 allocation. All other investigators and the study statistician will remain blinded until the database has been  
24  
25 cleaned, a blinded data review has taken place, and the database is ready for analysis.  
26  
27  
28  
29

### 30 **Analysis**

31  
32 Analyses will be performed on an intention-to-treat basis including all randomised dyads in their allocated  
33  
34 study arm. The primary outcome (NPI-Q severity total score) will be analysed using a constrained longitudinal  
35  
36 data analysis (cLDA) model,[48] with response consisting of all scores (baseline, 12 weeks and 6-months) and  
37  
38 the model including factors representing intervention, time, intervention by time interaction, and country with  
39  
40 the restriction of a common baseline mean score across interventions. The absolute difference between MI and  
41  
42 SC and MI and RI in mean change from baseline will be estimated (including two-sided 95% confidence  
43  
44 interval) at 12 weeks (primary time point). A hierarchical fixed sequence testing procedure will allow testing of  
45  
46 MI versus RI at 12 weeks at 5% if the comparison of MI versus SC at 12 weeks has a p-value < 0.05.  
47  
48

49 Secondary analyses will consist of a model adjusted for potential confounders (forms of dementia and gender).  
50  
51 The cLDA model provides valid inference if the missing data mechanism is at most missing at random. In  
52  
53 addition to the intention-to-treat effect we will obtain the complier average causal effect by making use of the  
54  
55 collected adherence data,[49]. Analyses similar to the primary outcome will be applied to the secondary  
56  
57 outcomes for PwD and CGs. Heterogeneity of the intervention effect across subgroups (gender of the PwD/CG,  
58  
59  
60



1 forms of dementia, country) will be assessed by means of interaction tests. The number and percentage of  
2 PwDs and CGs with adverse events will be summarized by intervention group.  
3  
4  
5  
6  
7

8 Cost-effectiveness analysis in a societal perspective will be performed separately for each country using the  
9 utilities generated by EQ-5D-5L for both PwD and CG and country-specific weights, to estimate a combined  
10 QALY score using a generalized linear model adjusted by the baseline. Health and informal care resources  
11 consumed by PwD will be assessed using the RUD and unit cost by country. A generalized linear mixed model  
12 will be used to estimate the main predictors of the total costs in the MI, RI and SC groups. Incremental cost-  
13 effectiveness ratio (ICER) will be calculated using the cost and effect estimates comparing MI with RI and SC.  
14 The uncertainty around the ICER will be estimated using bootstrapping (1000 replications) adjusting to control  
15 variables.  
16  
17  
18  
19  
20  
21  
22  
23  
24  
25  
26

### 27 **Patient and public involvement**

28 All countries have involved user and advocacy organisations in the development and design of the study. The  
29 UK, Australia, and Germany have been piloting work with formal and informal CGs of PwD for many years.  
30 CGs and PwD have been involved designing the diaries which capture adherence data. It was imperative that  
31 the diary be user-friendly, not burdensome on the CG, and yet enabled them to document both the positive  
32 and negative aspects of the session. Several iterations of the diary were constructed prior to arriving at the  
33 final structure. Pilot work in Australia,[14] involved interviews post-intervention to identify strengths,  
34 limitations, challenges, and experiences in delivering the MI and RI?, as well as recommendations for  
35 suggested modifications to the intervention training. Representatives of advocacy groups and end users from  
36 all countries will be represented on an international Participant and Public Involvement Committee.  
37  
38  
39  
40  
41  
42  
43  
44  
45  
46  
47  
48  
49

### 50 **Monitoring and Oversight**

51 A Trial Operations Committee (TOC) will comprise the principal investigator, chief investigators and  
52 clinical trial managers from each of the 5 countries, the biostatistician, health economist, and a consumer  
53 representative. The TOC will meet at least 6-weekly, and will oversee all aspects of the trial delivery  
54 including strategies to support efficient and effective recruitment and retention, reviewing completeness of  
55 datasets, monitoring intervention fidelity, management of timelines and milestones, review of country-by-  
56  
57  
58  
59  
60

1  
2 country progress, public and patient involvement or actions, and publication and dissemination plans. The  
3  
4 role of the members of the TOC is to bring country-specific issues to the international team for discussion to  
5  
6 ensure the study is being monitored and delivered according to the agreed protocols. Protocol deviations and  
7  
8 any changes or amendments to the operational processes of the trial will be discussed and decisions made by  
9  
10 the TOC.  
11  
12  
13

14 A Trial Steering Committee (TSC) will comprise of members independent of the clinical trial as well as  
15  
16 members and representing consumers and other relevant advocacy organisations. The trial Principal  
17  
18 Investigator (or a proxy in her absence) will also sit on the committee as a non-voting member. The  
19  
20 Committee will meet biannually (or more often when needed) to review and monitor all aspects of the study  
21  
22 delivery. The committee will take careful note of recruitment and retention rates and identify potential  
23  
24 modifications to protocols to mitigate risk of slow recruitment and attrition. They will draw on reports  
25  
26 provided to them by the Data and Safety Monitoring Committee (DSMC) and make recommendations to the  
27  
28 PI and TOC about whether further actions are required.  
29  
30

31 A DSMC will meet biannually (prior to the TSC) to review the cumulative study data to evaluate the safety,  
32  
33 study conduct, and scientific validity and integrity of the trial. The committee consist of at least four people  
34  
35 with strong methodological, biostatistical, and clinical expertise who are independent of the project and an  
36  
37 end user representative. The DSMC will be provided with data on recruitment, intervention uptake, any  
38  
39 unforeseen and/or adverse events, and review serious adverse events. The meetings will consist of an open  
40  
41 and a closed part. In the open part, the general progress of the trial will be discussed with the principal  
42  
43 investigator. In the closed part, the DSMC will discuss any safety concerns and if considered required, the  
44  
45 DSMC will make recommendations to the TSC for appropriate action.  
46  
47  
48

49 Pilot testing in Australia will be undertaken to test the intervention fidelity, recruitment rates and retention,  
50  
51 assessment processes, test the suitability of the developed database, and test the data monitoring systems.  
52  
53 The data of the pilot cohort will be included in the main trial; no statistical adjustments are made because the  
54  
55 decision depends only on feasibility, no group comparisons will be made.  
56  
57  
58  
59  
60

1  
2 Study data will be collected and managed using REDCap® electronic data capture tools hosted at the  
3  
4 University of Melbourne,[50]. The Data Management Coordinating Center will oversee the intra-study data  
5  
6 sharing process, with input from the Data Management Subcommittee. We will develop a data management  
7  
8 manual detailing data collection protocols and provide comprehensive training of those members of the  
9  
10 research team who collect, check and enter study data. The Principal Investigator, biostatistician, and health  
11  
12 economist from the University of Melbourne will be given access to the cleaned data sets. Country specific  
13  
14 lead investigators will only have access to their own country's cleaned data sets. All data sets will be  
15  
16 password-protected. To ensure confidentiality, data dispersed to project team members will have any  
17  
18 identifying information removed.  
19  
20  
21  
22

### 23 **Risk management**

24  
25 Processes have been put in place to mitigate risks. One of the most significant risks associated with the  
26  
27 project is slow recruitment. To offset the risk of slow recruitment, data is being collected across five  
28  
29 countries. If some countries have less difficulty than others in recruiting, then these countries will recruit  
30  
31 greater numbers to ensure the required sample size is obtained. Another risk identified is the heterogeneity of  
32  
33 intervention delivery. The inclusion of a detailed manual, regular supervision with interventionists, and  
34  
35 monitoring the effectiveness of interventionist training will mitigate the risk of poor intervention fidelity.  
36  
37  
38  
39  
40

### 41 **Relevance and Benefit to Society**

42  
43 As the majority of PwD live in the community and not in residential care settings, quality informal care for  
44  
45 PwD is crucial for managing BPSD and enhancing QoL. This protocol details the process for testing the  
46  
47 effectiveness and cost-effectiveness of a CG-directed music intervention and reading intervention designed  
48  
49 to manage the BPSD of PwD, the sense of burden and wellbeing of the CG, and provide meaningful  
50  
51 possibilities to maintain the relationship between PwD and their CGs. We expect that with support and  
52  
53 training, the MI will be easily implemented in the family home by CGs. With the increasing number of  
54  
55 people living with dementia and the stress this will place on countries' economies, our project aims to test an  
56  
57 intervention designed to keep people living at home with family CGs for as long as possible, reducing the  
58  
59 burden for society and caregivers. Our study will be able to estimate the ICER between MI and RI, MI and  
60

1  
2 SC, and RI and SC. Data may support aged care policy recommendations and as the interventions will be  
3  
4 delivered in five different countries, results will be broadly generalisable.  
5  
6  
7

8 **References:**  
9  
10

- 11  
12 1. Livingston G, Sommerlad A, Orgeta V, et al. Dementia prevention, intervention, and care. *Lancet*.  
13 2017;390:2673-2734. doi:10.1016/S0140-6736(17)31363-6. [published Online First: 20 July 2017].
- 14  
15 2. Papastavrou E, Kalokerinou A, Papacostas SS, et al. Caring for a relative with dementia: family  
16 caregiver burden. *J Adv Nurs*. 2007;58: 446-57.
- 17  
18 3. O'Dwyer S, Moyle W, van Wyk S. Suicidal ideation and resilience in family carers of people with  
19 dementia: A pilot qualitative study. *Aging Ment Health*. 2013;17:753–760.  
20 doi:10.1080/13607863.2013.789001. [published Online First: 23 April 2013].
- 21  
22 4. Li R, Cooper C, Austin A, et al. Do changes in coping style explain the effectiveness of interventions  
23 for psychological morbidity in family carers of people with dementia? A systematic review and  
24 meta-analysis. *Int Psychogeriatr*. 2013;25:204-214. doi:10.1017/S1041610212001755. [published  
25 Online First: 22 October 2012].
- 26  
27 5. Piersol CV, Canton K, Connor SE, et al. Effectiveness of interventions for caregivers of people with  
28 Alzheimer's disease and related major neurocognitive disorders: A systematic review. *Am J Occup*  
29 *Ther*, 2017;71(5): 7105180020p1-7105180020p10. doi: 10.5014/ajot.2017.027581.
- 30  
31 6. deVugt, M. E. Stevens F, Aalten P, et al. Behavioural disturbances in dementia patients and quality  
32 of the marital relationship. *Inter. J. Geriatr Psychiatry* 2003;18:149–154.
- 33  
34 7. Hsu MH, Flowerdew R, Parker M, et al. Individual music therapy for managing neuropsychiatric  
35 symptoms for people with dementia and their carers: a cluster randomized controlled feasibility  
36 study. *BMC Geriatr* 2015;15:84-015-0082-4. doi.org/10.1186/s12877-015-0082-4 [published Online  
37 First: 18 July 2015].
- 38  
39 8. National Institute for Health and Care Excellence. NICE guidelines: Dementia: assessment,  
40 management and support for people living with dementia and their carers. Published: 20 June 2018.  
41 Available at: [nice.org.uk/guidance/ng97](http://nice.org.uk/guidance/ng97).  
42  
43  
44  
45  
46  
47  
48  
49  
50  
51  
52  
53  
54  
55  
56  
57  
58  
59  
60

- 1  
2 9. Fusar-Poli L, Bieleninik L, Brondino N, et al. The effect of music therapy on cognitive functions in  
3 patients with dementia: a systematic review and meta-analysis. *Aging Ment Health* 2017;1–10.  
4 doi.org/10.1080/13607863.2017.1348474 [Published online: 10 Jul 2017].  
5  
6  
7
- 8 10. Zhang Y, Cai J, An L, et al. Does music therapy enhance behavioral and cognitive function in  
9 elderly dementia patients? A systematic review and meta-analysis. *Ageing Res Rev* 2017;35:1–11.  
10 doi.org/10.1016/j.arr.2016.12.003 [published Online First: 23 December 2016].  
11  
12  
13
- 14 11. Ridder HM, Stige B, Qvale LG, et al. Individual music therapy for agitation in dementia: an  
15 exploratory randomized controlled trial. *Aging Ment Health* 2013;17(6):667-678.  
16 doi:10.1080/13607863.2013.790926. [published Online First: 27 April 2013].  
17  
18  
19
- 20 12. Kitwood T. Dementia reconsidered: The person comes first. Buckingham, UK: Open University  
21 Press 1997.  
22  
23  
24
- 25 13. Brooker D. Person-centred Dementia Care: Making Services Better. London: Jessica Kingsley  
26 Publishers 2007.  
27  
28
- 29 14. Baker F, Grocke D, Pachana N. Connecting through music: A study of a spousal carer-directed  
30 music intervention designed to prolong fulfilling relationships in couples where one person has  
31 dementia. *Australian Journal of Music Therapy* 2012;23:4-19.  
32  
33  
34
- 35 15. Jacobsen J.H., Stelzer J, Fritz TH, et al. Why musical memory can be preserved in advanced  
36 Alzheimer's disease. *Brain* 2015;138:2438-2450. doi:10.1093/brain/awv135. [published Online First:  
37 3 June 2015].  
38  
39  
40  
41
- 42 16. Ray KD, Mittelman MS. Music therapy: A nonpharmacological approach to the care of agitation and  
43 depressive symptoms for nursing home residents with dementia. *Dementia* 2017;16(6):689-710.  
44 doi.org/10.1177/1471301215613779 [published Online First: 29 October 2015].  
45  
46  
47
- 48 17. Aalbers S, Fusar-Poli L, Freeman RE, et al. Music therapy for depression. *Cochrane Database Syst*  
49 *Rev* 2017;11. doi:10.1002/14651858.CD004517.pub3. [published Online First: 16 November 2017].  
50  
51  
52
- 53 18. van der Steen JT, van Soest-Poortvliet MC, van der Wouden JC. Music-based therapeutic  
54 interventions for people with dementia. *Cochrane Database Syst Rev* 2017;5.  
55 doi:10.1002/14651858.CD003477.pub3. [published Online First: 02 May 2017].  
56  
57  
58  
59  
60

19. Longden E, Davis PM, Carroll J, et al. An evaluation of shared reading groups for adults living with dementia: preliminary findings. *J Public Ment Health* 2016;15(2):75-82. doi:10.1108/JPMH-06-2015-0023 [published Online First: June 2016].
20. Kawashima R, Okita K, Yamazaki R, et al. Reading Aloud and Arithmetic Calculation Improve Frontal Function of People With Dementia. *J Gerontol A Biol Sci Med Sci* 2005;60(3):380–384.
21. Vink AC, Birks JS, Bruinsma MS, et al. Music therapy for people with dementia. *Cochrane Database Syst Rev* 2004;3. doi:10.1002/14651858.CD003477.pub2. [published Online First: 20 October 2003].
22. Siafarikas N, Selbaek G, Fladby T, et al. Frequency and subgroups of neuropsychiatric symptoms in mild cognitive impairment and different stages of dementia of Alzheimer’s Disease. *Int Psychogeriatr* 2018;30(1):103-113. doi:10.1017/S1041610217001879. [published Online First: 20 September 2017].
23. Baird A, Thompson WF. The Impact of Music on the Self in Dementia. *J Alzheimers Dis* 2018;61(3):827-841. doi:10.3233/JAD-170737. [published Online First: 9 January 2018].
24. Särkämö T, Tervaniemi M, Laitinen S, et al. Cognitive, emotional, and social benefits of regular musical activities in early dementia: randomized controlled study. *Gerontologist* 2014;54(4):634-650. doi: 10.1093/geront/gnt100. [published Online First: 5 September 2013].
25. Moniz-Cook E, Vernooij-Dassen M, Woods R, et al. A European consensus on outcome measures for psychosocial intervention research in dementia care. *Aging Ment Health* 2008;12(1):14-29. doi:10.1080/13607860801919850 [published Online First: 25 February 2008].
26. Kaufer DI, Cummings JL, Ketchel P, et al. Validation of the NPI-Q, a brief clinical form of the Neuropsychiatric Inventory. *J Neuropsychiatry and Clin Neurosci* 2000;12:233-239.
27. Wong A, Cheng ST, Lo ES, et al. Validity and reliability of the Neuropsychiatric Inventory Questionnaire version in patients with stroke or transient ischemic attack having cognitive impairment. *J Geriatr Psychiatry Neurol* 2014;27(4):247-252. doi:10.1177/0891988714532017. [published Online First: 24 April 2014].
28. Fantino B, Moore N. The self-reported Montgomery-Åsberg depression rating scale is a useful evaluative tool in major depressive disorder. *BMC Psychiatry* 2009;9:26. doi.org/10.1186/1471-244X-9-26. [published Online First: 27 May 2009].

- 1  
2  
3  
4  
5  
6  
7  
8  
9  
10  
11  
12  
13  
14  
15  
16  
17  
18  
19  
20  
21  
22  
23  
24  
25  
26  
27  
28  
29  
30  
31  
32  
33  
34  
35  
36  
37  
38  
39  
40  
41  
42  
43  
44  
45  
46  
47  
48  
49  
50  
51  
52  
53  
54  
55  
56  
57  
58  
59  
60
29. Logsdon R, Gibbons LE, McCurry SM, et al. Assessing Quality of Life in older adults with cognitive impairment. *Psychosom Med* 2002;64(3):510–519.
  30. Thorgrimsen L, Selwood A, Spector A, et al. Whose quality of life is it anyway: The validity and reliability of the Quality of Life-Alzheimer's Disease scale. *Alzheimer Dis Assoc Disor* 2003;17(4):201-208.
  31. Pangman VC, Sloan J, Guse L. An Examination of Psychometric Properties of the Mini-Mental Status Examination and the Standardized Mini-Mental Status Examination: Implications for Clinical Practice. *Appl Nurs Res* 2000;13(4):209-213. doi:10.1053/apnr.2000.9231. [published Online First: November 2000].
  32. Kroenke K, Spitzer RL, Williams JB, et al. The PHQ-9: Validity of a brief depression severity measure. *J Gen Intern Med* 2001;16(9):606-613.
  33. Cosco K, Kaushal A, Richards M, et al. Resilience measurement in later life: A systematic review and psychometric analysis. *Health Qual Life Outcomes* 2016. doi:10.1186/s12955-016-0418-6 [published Online First: 28 January 2016].
  34. Wagnild G, Young H. Development and psychometric evaluation of the Resilience Scale. *J Nurs Meas* 1993;1(2):165-178.
  35. Vernooij-Dassen MJ, Felling AJ, Brummelkamp E. Assessment of caregiver's competence in dealing with the burden of caregiving for a dementia patient: a Short Sense of Competence Questionnaire (SSCQ) suitable for clinical practice. *J Am Geriatr Soc* 1999;47(2):256-257.
  36. Richardson J, Peacock S, Hawthorne G, et al. Construction of the descriptive system for the assessment of quality of life AQoL-6D utility instrument. *Health Qual Life Outcomes* 2012;10(38). doi:10.1186/1477-7525-10-38. [published Online First: 17 April 2012].
  37. Richardson J, Iezzi A, Khan MA, et al. Cross-national comparison of twelve quality of life instruments: MIC Paper 2 Australia. Center for Health Economics. Victoria, Australia: Monash University 2012.
  38. Spruytte N, Van Audenhove C, Lammertyn F, et al. The quality of the caregiving relationship in informal care for older adults with dementia and chronic psychiatric patients. *Psychol Psychother* 2002;75(3):295-311.

- 1  
2  
3  
4  
5  
6  
7  
8  
9  
10  
11  
12  
13  
14  
15  
16  
17  
18  
19  
20  
21  
22  
23  
24  
25  
26  
27  
28  
29  
30  
31  
32  
33  
34  
35  
36  
37  
38  
39  
40  
41  
42  
43  
44  
45  
46  
47  
48  
49  
50  
51  
52  
53  
54  
55  
56  
57  
58  
59  
60
39. Herdman M, Gudex C, Lloyd A, et al. Development and preliminary testing of the new five-level version of EQ-5D (EQ-5D-5L). *Qual Life Res* 2011;20(10):1727-1736. doi: 10.1007/s11136-011-9903-x. [published Online First: 9 April 2011].
  40. EuroQol Group. EuroQol-a new facility for the measurement of health-related quality of life. *Health Policy* 1990;16(3):199-208.
  41. Orgeta V, Edwards RT, Hounsome B, et al. The use of the EQ-5D as a measure of health-related quality of life in people with dementia and their carers. *Qual Life Res* 2015;24(2):315-324. doi:10.1007/s11136-014-0770-0. [published Online First: 17 August 2014].
  42. Kunz S. Psychometric properties of the EQ-5D in a study of people with mild to moderate dementia." *Qual Life Res* 2010;19(3):425-434. doi:10.1007/s11136-010-9600-1. [published Online First: 10 February 2010].
  43. Arons AM, Krabbe PFM, Schölzel-Dorenbos CJM, et al. Quality of life in dementia: a study on proxy bias. *BMC Med Res Methodol* 2013;13:110. doi:10.1186/1471-2288-13-110. [published Online First: September 2013].
  44. Wimo A, Gustavsson A, Jönsson L., et al. Featured Article: Application of Resource Utilization in Dementia (RUD) instrument in a global setting. *Alzheimers Dement* 2013;9(4):9429-9435.e17. doi:10.1016/j.jalz.2012.06.008. [published Online First: 9 November 2012].
  45. Mao HF, Kuo CA, Huang WN, et al. Values of the minimal clinically important difference for the Neuropsychiatric Inventory Questionnaire in individuals with dementia. *J Am Geriatr Soc* 2015;63(7):1448-1452. doi:10.1111/jgs.13473. [published Online First: 5 June 2015].
  46. Giebel CM, Sutcliffe C, Stolt M, et al. Deterioration of basic activities of daily living and their impact on quality of life across different cognitive stages of dementia: A European study. *Int Psychogeriatr* 2014;26(8):1283-1293. doi:10.1017/S1041610214000775. [published Online First: 1 May 2014].
  47. Howard R, Phillips P, Johnson T, et al. Determining the minimum clinically important differences for outcomes in the DOMINO trial. *Int J Geriatr Psychiatry* 2011;26:812-817. doi:10.1002/gps.2607. [published Online First: 16 September 2010].
  48. Liang Z, Zeger S. Longitudinal data analysis of continuous and discrete responses for prepost designs. *The Indian Journal of Statistics* 2000;62:134-148.



- 1  
2 49. Angrist JD, Imbens GW, Rubin DB. Identification of causal effects using instrumental variables. *J*  
3  
4 *Am Stat Assoc* 1996;91(434):444-455.  
5  
6 50. Harris PA, Taylor R, Thielke R, et al. Research electronic data capture (REDCap) - A metadata-  
7  
8 driven methodology and workflow process for providing translational research informatics support. *J*  
9  
10 *Biomed Inform* 2009;42:377-381. doi:10.1016/j.jbi.2008.08.010. [published Online First: 30  
11  
12 September 2008].  
13  
14  
15  
16  
17  
18  
19  
20  
21  
22  
23  
24  
25  
26  
27  
28  
29  
30  
31  
32  
33  
34  
35  
36  
37  
38  
39  
40  
41  
42  
43  
44  
45  
46  
47  
48  
49  
50  
51  
52  
53  
54  
55  
56  
57  
58  
59  
60

For peer review only

1  
2  
3  
4  
5  
6  
7  
8  
9  
10  
11  
12  
13  
14  
15  
16  
17  
18  
19  
20  
21  
22  
23  
24  
25  
26  
27  
28  
29  
30  
31  
32  
33  
34  
35  
36  
37  
38  
39  
40  
41  
42  
43  
44  
45  
46  
47  
48  
49  
50  
51  
52  
53  
54  
55  
56  
57  
58  
59  
60

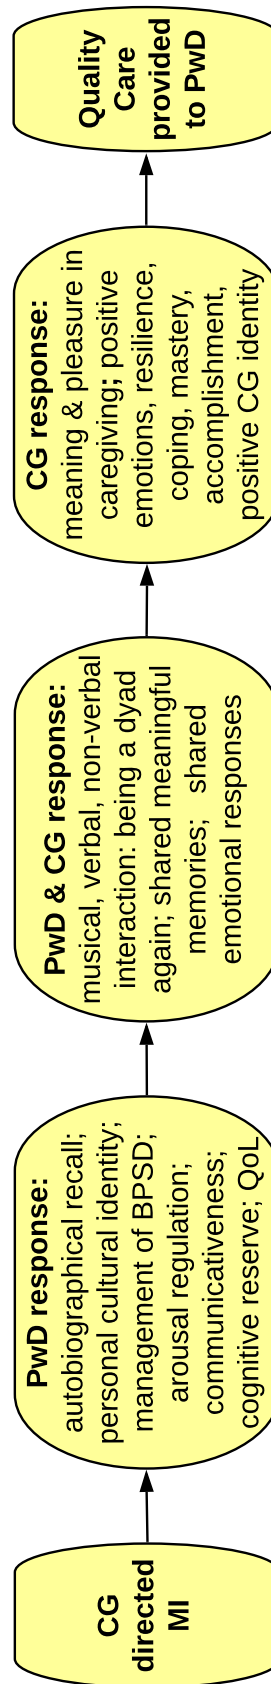

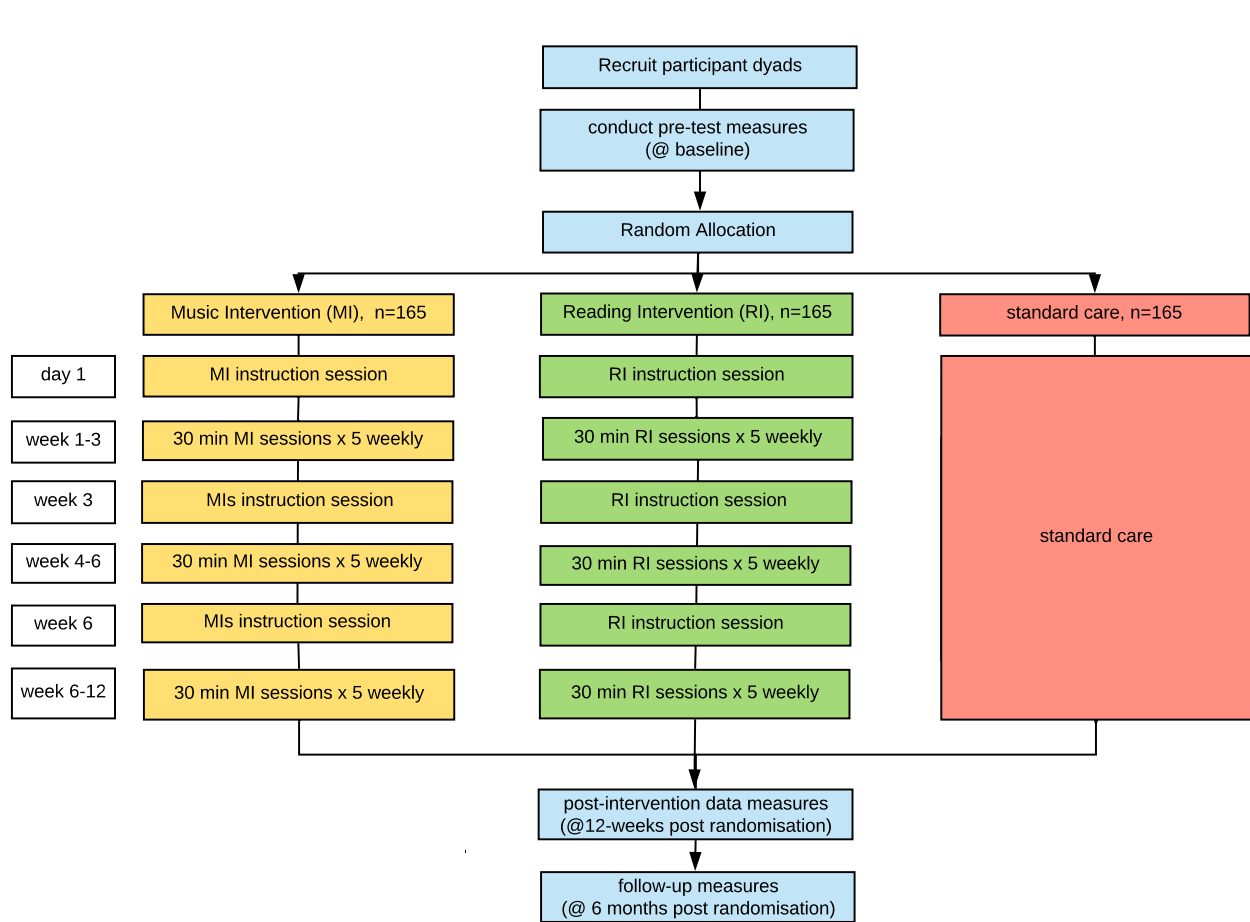

**Figure 2. HOMESIDE Trial Design**  
 Note, MI and RI are in addition to standard care.

review only

|                                                                   | Enrolment              | Allocation | Intervention         |                        |                        |                        | Follow-up               |
|-------------------------------------------------------------------|------------------------|------------|----------------------|------------------------|------------------------|------------------------|-------------------------|
| TIMEPOINT                                                         | -1day<br>(-7- -1 days) | 0          | 1day<br>(+/- 7 days) | Day 21<br>(+/- 7 days) | Day 42<br>(+/- 7 days) | Day 90<br>(+/- 7 days) | Day 180<br>(+/- 7 days) |
| <b>ENROLMENT:</b>                                                 |                        |            |                      |                        |                        |                        |                         |
| Eligibility screen                                                | X                      |            |                      |                        |                        |                        |                         |
| Informed consent (or assent)                                      | X                      |            |                      |                        |                        |                        |                         |
| Dyad: allocation                                                  |                        | X          |                      |                        |                        |                        |                         |
| <b>INTERVENTIONS:</b>                                             |                        |            |                      |                        |                        |                        |                         |
| <i>Music Intervention Training</i>                                |                        |            | X                    | X                      | X                      |                        |                         |
| <i>Reading Intervention Training</i>                              |                        |            | X                    | X                      | X                      |                        |                         |
| <b>ASSESSMENTS:</b>                                               |                        |            |                      |                        |                        |                        |                         |
| <b>PERSON WITH DEMENTIA sociodemographic information</b>          | X                      |            |                      |                        |                        |                        |                         |
| <b>MMSE (self)</b>                                                | X                      |            |                      |                        |                        | X                      |                         |
| <b>dementia diagnosis (proxy)</b>                                 | X                      |            |                      |                        |                        |                        |                         |
| <b>NPI-Q (proxy)</b>                                              | X                      |            |                      |                        |                        | X                      | X                       |
| <b>MADRS (proxy)</b>                                              | X                      |            |                      |                        |                        | X                      | X                       |
| <b>QoL-AD (proxy or self)</b>                                     | X                      |            |                      |                        |                        | X                      | X                       |
| <b>EQ-5D-5L (self and proxy)</b>                                  | X                      |            |                      |                        |                        | X                      | X                       |
| <b>Adverse events; death, hospitalisation, death of caregiver</b> |                        |            | X                    | X                      | X                      | X                      | X                       |
| <b>CAREGIVER sociodemographic information</b>                     | X                      |            |                      |                        |                        |                        |                         |
| <b>PHQ-9</b>                                                      | X                      |            |                      |                        |                        | X                      | X                       |
| <b>RS-14</b>                                                      | X                      |            |                      |                        |                        | X                      | X                       |
| <b>SSCQ</b>                                                       | X                      |            |                      |                        |                        | X                      | X                       |
| <b>QPCR</b>                                                       | X                      |            |                      |                        |                        | X                      | X                       |

|    |                               |   |  |   |   |   |     |
|----|-------------------------------|---|--|---|---|---|-----|
| 1  |                               |   |  |   |   |   |     |
| 2  |                               |   |  |   |   |   |     |
| 3  | <b>AQoL-6D</b>                | X |  |   |   |   | X X |
| 4  | <b>EQ-5D-5L</b>               | X |  |   |   |   | X X |
| 5  | <b>(self)</b>                 |   |  |   |   |   |     |
| 6  | <b>RUD</b>                    | X |  |   |   |   | X X |
| 7  |                               |   |  |   |   |   |     |
| 8  | <b>Interviews</b>             |   |  |   |   |   | X   |
| 9  |                               |   |  |   |   |   |     |
| 10 | <b>Diary (5xweekly diary</b>  |   |  |   |   |   |     |
| 11 | <b>entries for MI and RI)</b> |   |  | X | X | X | X   |
| 12 |                               |   |  |   |   |   |     |
| 13 | <b>Adverse events;</b>        |   |  |   |   |   |     |
| 14 | <b>death, hospitalisation</b> |   |  |   |   |   |     |
| 15 |                               |   |  |   |   |   |     |
| 16 |                               |   |  |   |   |   |     |

### Figure 3. Schedule of enrolment, interventions, and assessments

RUD - Resource Utilization in Dementia, MMSE -MiniMental State Examination Score; ICD-10 – International Classification of Diseases-10; NPI-Q – Neuropsychiatric Inventory; MADRS - Montgomery Asberg Depression Rating Scale; QoL-AD - Quality of Life-Alzheimer's Disease; PHQ-9 - Patient Health Questionnaire-9; RS - Resilience Scale; SSCQ - Short Sense of Competence Questionnaire; AQoL-6D - Assessment of Quality of Life-6D instrument; QCPR - Quality of Caregiver-Patient Relationship; Quality Adjusted Life-Years – EQ-5D-5L The EuroQol instrument

# BMJ Open

## **HOMESIDE: Home-based family caregiver-delivered music and reading interventions for people living with dementia: Protocol of a randomised controlled trial.**

|                                 |                                                                                                                                                                                                                                                                                                                                                                                                                                                                                                                                                                                                                                                                                                                                                                                                                                                                                                                                                                                                                                                                                                                                                                                        |
|---------------------------------|----------------------------------------------------------------------------------------------------------------------------------------------------------------------------------------------------------------------------------------------------------------------------------------------------------------------------------------------------------------------------------------------------------------------------------------------------------------------------------------------------------------------------------------------------------------------------------------------------------------------------------------------------------------------------------------------------------------------------------------------------------------------------------------------------------------------------------------------------------------------------------------------------------------------------------------------------------------------------------------------------------------------------------------------------------------------------------------------------------------------------------------------------------------------------------------|
| Journal:                        | <i>BMJ Open</i>                                                                                                                                                                                                                                                                                                                                                                                                                                                                                                                                                                                                                                                                                                                                                                                                                                                                                                                                                                                                                                                                                                                                                                        |
| Manuscript ID                   | bmjopen-2019-031332.R1                                                                                                                                                                                                                                                                                                                                                                                                                                                                                                                                                                                                                                                                                                                                                                                                                                                                                                                                                                                                                                                                                                                                                                 |
| Article Type:                   | Protocol                                                                                                                                                                                                                                                                                                                                                                                                                                                                                                                                                                                                                                                                                                                                                                                                                                                                                                                                                                                                                                                                                                                                                                               |
| Date Submitted by the Author:   | 12-Jul-2019                                                                                                                                                                                                                                                                                                                                                                                                                                                                                                                                                                                                                                                                                                                                                                                                                                                                                                                                                                                                                                                                                                                                                                            |
| Complete List of Authors:       | Baker, Felicity; The University of Melbourne<br>Bloska, Jodie; Anglia Ruskin University, Music Therapy<br>Braat, Sabine ; University of Melbourne School of Population and Global Health, Centre for Epidemiology and Biostatistics<br>Bukowska, Anna; University of Physical Education<br>Clark, Imogen; Melbourne Conservatorium of Music<br>Hsu, Ming; Anglia Ruskin University<br>Kvamme, Tone; Norwegian Academy of Music, Music Therapy<br>Lautenschlager, Nicola; University of Melbourne, Academic Unit of Psychiatry of Old Age, Department of Psychiatry, Royal Melbourne Hospital, Royal Park Campus; Royal Melbourne Hospital Royal Park Campus, NorthWestern Mental Health, Melbourne Health<br>Lee, Young-Eun; Melbourne Conservatorium of Music<br>Smrokowska-Reichmann, Agnieszka; University of Physical Education<br>Sousa, Tanara; The University of Melbourne School of Population and Global Health<br>Stensaeth, Karette; Norwegian Academy of Music<br>Tamplin, Jeanette; Melbourne Conservatorium of Music<br>Wosch, Thomas; Hochschule fur angewandte Wissenschaften Wurzburg-Schweinfurt<br>Odell-Miller, Helen; Anglia Ruskin University - Cambridge Campus |
| <b>Primary Subject Heading</b>: | Geriatric medicine                                                                                                                                                                                                                                                                                                                                                                                                                                                                                                                                                                                                                                                                                                                                                                                                                                                                                                                                                                                                                                                                                                                                                                     |
| Secondary Subject Heading:      | Patient-centred medicine                                                                                                                                                                                                                                                                                                                                                                                                                                                                                                                                                                                                                                                                                                                                                                                                                                                                                                                                                                                                                                                                                                                                                               |
| Keywords:                       | music therapy, Dementia < NEUROLOGY, caregivers, home-based interventions, randomised controlled trial, behavioural and psychological symptoms of dementia                                                                                                                                                                                                                                                                                                                                                                                                                                                                                                                                                                                                                                                                                                                                                                                                                                                                                                                                                                                                                             |
|                                 |                                                                                                                                                                                                                                                                                                                                                                                                                                                                                                                                                                                                                                                                                                                                                                                                                                                                                                                                                                                                                                                                                                                                                                                        |

SCHOLARONE™  
Manuscripts

1  
2 Title: HOMESIDE: Home-based family caregiver-delivered music and reading interventions for  
3 people living with dementia: Protocol of a randomised controlled trial.  
4

5 Baker, F.A.<sup>1,2</sup>, Bloska, J.<sup>3</sup>, Braat, S.<sup>4</sup>, Bukowska, A.<sup>8</sup>, Clark, I.N.<sup>1</sup>, Hsu, M. H.<sup>3</sup>, Kvamme, T.<sup>2</sup>,  
6 Lautenschlager, N.T.<sup>5,6</sup>, Lee, Y-E.C.<sup>1</sup>, Smrokowska-Reichmann, A.<sup>8</sup>, Sousa, T.<sup>4</sup>, Stensæth, K.<sup>2</sup>,  
7 Tamplin, J.<sup>1</sup>, Wosch, T.<sup>7</sup>, Odell-Miller, H.<sup>3</sup>  
8

9 <sup>1</sup> Creative Arts and Music Therapy Research Unit, The University of Melbourne, Australia

10 <sup>2</sup> Centre for Music and Health, Norwegian Academy of Music, Norway

11 <sup>3</sup> Cambridge Institute for Music Therapy Research, Anglia Ruskin University, UK

12 <sup>4</sup> School of Population and Global Health, University of Melbourne, Australia

13 <sup>5</sup> Department of Psychiatry, Royal Melbourne Hospital, University of Melbourne, Australia

14 <sup>6</sup> Royal Melbourne Hospital Royal Park Campus, NorthWestern Mental Health, Melbourne Health  
15 Parkville, VIC, Australia

16 <sup>7</sup> Faculty of Applied Social Sciences, Music Therapy Lab, University of applied Sciences Würzburg-  
17 Schweinfurt, Germany

18 <sup>8</sup> Department of Occupational Therapy, University of Physical Education in Krakow, Poland

19  
20  
21  
22  
23  
24  
25  
26  
27  
28  
29  
30  
31  
32  
33  
34 Corresponding Author: Felicity Anne Baker, 234 St Kilda Rd, The University of Melbourne,  
35 Southbank, Melbourne, AUSTRALIA 3006, [felicity.baker@unimelb.edu.au](mailto:felicity.baker@unimelb.edu.au), Ph: +61 3 9035 3057,  
36  
37  
38 fax: +61 3 8344 5346  
39  
40  
41  
42  
43

44 Author Contributions: FB took the initiative for the study; FB, HOM, TW, KS, AB, JB developed  
45 the concept and design; SB developed the statistical analysis plan and TS designed the health  
46 economics plan. IC, MH, TK, NL, YL, ASR, JT helped to revise the concept and design. FB  
47 drafted the manuscript; all authors revised the manuscript for important intellectual content. All  
48 authors approved the final version of the manuscript.  
49  
50  
51  
52  
53  
54  
55  
56

57 **Funding:** This work was supported by the Joint Programs for Neurodegenerative Diseases (JPND)  
58 which includes joint funding from the National Health and Medical Research Council  
59  
60

1  
2 (APP1169867), Norwegian Research Council, Federal Ministry of Education and Research,  
3  
4 Germany (01ED1901), and The National Centre for Research and Development, Poland, and  
5  
6 Alzheimer's Society, UK (grant no. 462).  
7

8  
9 **Completing Interests:** None declared  
10

11 **Trial Registration Numbers:** ACTRN12618001799246p; Clinical Trials.gov NCT03907748  
12  
13

14  
15  
16 **Word count: 5293** (excluding title page, abstract, references, figures)  
17  
18

19  
20  
21  
22 **Abstract:**  
23

24  
25  
26 *Introduction:* Pharmacological interventions to address behavioural and psychological symptoms of  
27  
28 dementia (BPSD) can have undesirable side effects, therefore non-pharmacological approaches to managing  
29  
30 symptoms may be preferable. Past studies show that music therapy can reduce BPSD, and other studies have  
31  
32 explored how formal caregivers use music in their caring roles. However, no randomised study has examined  
33  
34 the effects on BPSD of music interventions delivered by informal caregivers (CGs) in the home setting. Our  
35  
36 project aims to address the need for improved informal care by training cohabiting family CGs to implement  
37  
38 music interventions that target BPSD, and the quality of life (QoL) and wellbeing of people with dementia  
39  
40 (PwD) and of CGs.  
41

42  
43 *Methods and analysis:* A large international 3-arm parallel-group randomised controlled trial will recruit a  
44  
45 sample of 495 dyads from Australia, Germany, UK, Poland and Norway. Dyads will be randomised equally to  
46  
47 standard care (SC), a home-based music program plus SC, or a home-based reading program plus SC for 12  
48  
49 weeks. The primary outcome is BPSD of PwD (measured using the Neuropsychiatric Inventory-  
50  
51 Questionnaire). Secondary outcomes will examine relationship quality between CG and PwD, depression,  
52  
53 resilience, competence, QoL for CG, and QoL in PwD. Outcomes will be collected at baseline, at the end of the  
54  
55 12-week intervention and at 6-months post randomisation. Resource Utilization in Dementia will be used to  
56  
57 collect economic data across the life of the intervention and at 6-month follow-up. We hypothesize that the  
58  
59  
60



1  
2 music program plus SC will generate better results than SC alone (primary comparison) and the reading  
3  
4 program plus SC (secondary comparison).  
5

6 *Ethics and dissemination:* Ethical approval will be obtained for all countries. Results will be presented at  
7  
8 national and international conferences and published in scientific journals and disseminated to consumer and  
9  
10 caregiver representatives and the community.  
11  
12  
13  
14  
15

### 16 **Strengths and Limitations of this study**

17  
18  
19

- 20 • As a multinational trial, this study will provide internationally generalisable results concerning the  
21 effects of music intervention delivered by trained family caregivers on the behavioural and  
22 psychological symptoms of people living with dementia.  
23  
24
- 25 • Based on pilot data, this trial will have adequate power to determine the effects on the person with  
26 dementia.  
27  
28
- 29 • The trial will determine whether caregiver-delivered music interventions improve quality of life and  
30 wellbeing of the caregiver, and reduce healthcare costs for the caregiver and society.  
31  
32
- 33 • A comprehensive set of core outcomes will be measured, including long-term effects in key  
34 variables, with assessor blinding.  
35  
36
- 37 • As participants cannot be blinded, a limitation of the study is that they may provide biased responses  
38 on their self-report measures.  
39  
40  
41  
42  
43  
44  
45  
46  
47  
48  
49  
50  
51  
52  
53  
54  
55  
56  
57  
58  
59  
60

## BACKGROUND

Family caregivers (CG) play a vital role in providing care for a person living with dementia (PwD) in the home-setting [1]. This personalised care not only directly benefits the PwD by keeping them at home in a familiar environment but represents a significant economic contribution to society. CGs often find caregiving satisfying and rewarding, however the task of managing the challenging behavioural and psychological symptoms of dementia (BPSD) can override their capacity to cope, leading to negative physical and mental health including fatigue, depression, burnout, and illness,[2-3]. A deterioration in CG wellbeing may have a negative flow-on effect on the wellbeing of the PwD. A negative spiral may develop until the CG can no longer sustain the caring role, and the PwD moves into residential care earlier than desired.

The 2015 global cost of dementia was estimated to be US\$818 billion, and this figure will continue to increase as the number of people with dementia rises,[1]. Nearly 85% of costs are related to family and social, rather than medical care. With this increase and the escalating costs of care, it is time-critical that CG-directed home-based interventions are developed and tested. The 2017 Lancet Commission on Dementia,[1] suggests that pharmacological treatment of BPSD should be restricted to those with very severe symptoms and highlights music therapy as a non-pharmacological intervention that reduces BPSD (p.30).

Systematic reviews indicate that the majority of CG-directed interventions adopted cognitive-behavioural or psychoeducational approaches to address CG coping, depression and BPSD management,[4-5]. Adherence to programs was poor because CGs could not commit to the regular program attendance requirements,[4-5]. Drawing on social exchange theory, apathy and other BPSD lead to diminished reciprocity between CG and PwD, creating imbalances in the relationship,[6]. Therefore, the convenience of a home-based CG-delivered program that can manage BPSD and address relationship reciprocity is more likely to be adhered to, and more effective in promoting both PwD and CG wellbeing.

Music therapy is a registered psychosocial National Health Service (NHS in the UK) intervention that meets the current recommendations for addressing the individual needs of those with dementia,[7]. HOMESIDE (HOME-based caregiver-delivered music intervention for people living with dementia) uses a purposefully developed music intervention (MI) (described later) informed by previous meta-analyses that demonstrate

1 the effectiveness of music therapy in reducing BPSD,[8-11]. The MI is a translation of the research evidence  
2  
3  
4 to a home-care context and, instead of being delivered directly by qualified music therapists, they will train  
5  
6 CGs to deliver the MI. The MI incorporates Kitwood's model of personhood for PwD,[12], which is  
7  
8 essential to effective dementia care and underpins the philosophy of the 2018 Alzheimer's Association  
9  
10 Dementia Care Practice Recommendations. The person-centred dementia care embedded in the MI  
11  
12 emphasizes communication and relationships, recognising that dementia is best understood as an interplay  
13  
14 between neurological impairment and psychosocial factors (e.g. health, individual psychology) and the  
15  
16 environment,[13].  
17

18  
19  
20  
21 Small scale studies that have tested the effectiveness of MI training programs for informal and formal CGs  
22  
23 have had positive findings to date. Results of a cluster RCT with formal CGs showed the MI to be a  
24  
25 practicable and acceptable intervention, with PwD showing treatment-related improvements, and staff  
26  
27 reporting enhanced skills in caregiving,[8]. Although based on a small sample (N=17), large effects in BPSD  
28  
29 (Cohen's  $d=2.32$ ) were found between standard care (SC) and MI from baseline to 7-months. A home-based  
30  
31 feasibility RCT determined acceptability of the MI, assessed burden associated with delivering the MI, and  
32  
33 tested appropriateness of the measures,[14]. BPSD scores decreased from baseline to post-test in the MI  
34  
35 group but increased in the SC group and mixed results were shown for the comparative reading group. A  
36  
37 study involving eight family CGs who were trained to deliver home-based music programs for their care  
38  
39 recipient with dementia, found that both CGs and PwD improved in self-reported relaxation, comfort, and  
40  
41 happiness from baseline to post-test. Music activities taught to CGs comprised music listening with  
42  
43 reminiscence, movement to music, music and progressive muscle relaxation, drawing and discussing  
44  
45 drawing to music, singing, percussion instrument playing, and strategic use of music for use while  
46  
47 performing activities of daily living. CGs seemed to derive the most benefit from the program in comparison  
48  
49 with care recipients. Findings suggested that CGs enjoyed partaking in the reminiscing and shared musical  
50  
51 activities with their loved ones,[15].  
52  
53

54  
55  
56 The conceptual framework underpinning the MI incorporates the responses of the PwD, the ensuing moment  
57  
58 to moment interaction between the PwD and the CG, and the CGs' responses to the PwD and moments of  
59  
60 interaction (Figure 1). The MI is grounded in the established knowledge that music-induced emotions and

1 memories are often retained in PwD because of the relative preservation of medial frontal and limbic areas,[9,  
2  
3 16]. MIs are effective when the music selected for use is chosen by the PwD (or CG),[9, 11]. When music  
4  
5 facilitates moment to moment interactions, emotional and social engagement, and autobiographical recall,  
6  
7 imbalances in reciprocity are diminished. CGs' positive experience of seeing "the person behind the  
8  
9 dementia" via this music-induced response evokes CG experiences of pleasure, feelings of competence in the  
10  
11 CG, and fosters their resilience and coping. Ultimately the enhanced wellbeing of CGs will lead to more  
12  
13 effective care and better wellbeing outcomes for both CGs and PwD (Figure 1).  
14  
15  
16  
17  
18  
19  
20

<<INSERT FIGURE 1 ABOUT HERE

**Figure 1. Mechanisms of action underpinning the music intervention>>**

21  
22  
23  
24  
25 The comparative conditions in this trial are SC only (control) and a reading intervention plus SC (RI, active  
26  
27 control). The RI was included because studies have shown preliminary evidence that reading to and with PwD  
28  
29 can have positive impacts on BPSD,[17-18]. We anticipate MI to be superior to SC only. In addition, we  
30  
31 postulate that the RI will lead to a small positive effect but that MI is expected to be superior as music has  
32  
33 been shown to be a social connector and a trigger of autobiographical recall, is non-reliant on intact verbal  
34  
35 comprehension or expression, and can be used to regulate emotion and behaviour,[7, 9-11, 16, 19-22].  
36  
37  
38  
39

**Trial Design**

40  
41  
42 A large, pragmatic, single-blinded, international 3-arm parallel-group RCT design is planned with a 1:1:1  
43  
44 allocation ratio. Cohabiting dyads where one member of each dyad has a diagnosis of dementia will be  
45  
46 randomised to one of three conditions: 1) MI plus SC; 2) RI plus SC; and 3) SC only (Figure 2). CGs in MI  
47  
48 and RI groups will receive a 2-hour training session on how to deliver the MI or RI and will then engage the  
49  
50 PwD in a 5x weekly CG-directed home-program for 12 weeks. Two additional training sessions will be  
51  
52 provided at 3-weeks and 6-weeks post allocation. Fifteen-minute fortnightly phone calls will be scheduled to  
53  
54 support the CG, and encourage adherence to the protocol. Data will be collected at baseline, at the end of the  
55  
56 12-week intervention, and at 3-month follow-up (6-months post-randomisation). The SC group will not  
57  
58 receive any training sessions. This trial is framed as a superiority trial where we hypothesise that the MI will  
59  
60

1  
2 be superior to SC (primary) and RI plus SC (secondary) regarding BPSD of PwD at 12-weeks post-  
3  
4 randomisation.  
5  
6  
7

8 <<INSERT FIGURE 2 ABOUT HERE  
9

10 **Figure 2. HOMESIDE illustration of study design >>**  
11

## 12 **Objectives**

13  
14 The aim is to demonstrate the effectiveness of the 12-week HOMESIDE MI plus SC on the short-term BPSD at  
15 the end of intervention of PwD living at home and being cared for by a cohabiting CG compared to SC  
16 (primary), and to evaluate the effectiveness of MI plus SC compared to RI plus SC (secondary). Other  
17 secondary objectives are as follows:  
18  
19  
20  
21

- 22 • Evaluate the maintenance of the effect of the MI plus SC on longer-term (6 months post-  
23 randomisation) BPSD compared to SC and RI plus SC.
- 24 • Evaluate the effectiveness of the MI plus SC on short- and long-term levels of depression and quality  
25 of life of PwD compared to SC and RI plus SC.
- 26 • Evaluate the effectiveness of the MI plus SC on short- and long-term levels of depression, resilience,  
27 sense of competence, and quality of life of the CG compared to SC and RI plus SC.
- 28 • Evaluate the effectiveness of the MI plus SC on the short- and long-term perceived quality of the  
29 relationship between PwD and CG compared to SC and RI plus SC.
- 30 • Compare the cost-effectiveness of a CG-delivered MI plus SC on PwD and CG outcomes compared  
31 to SC and RI plus SC, using quality of life for both PwD and CG.  
32  
33  
34  
35  
36  
37  
38  
39  
40  
41  
42  
43  
44  
45  
46  
47

## 48 **METHODS AND ANALYSIS**

### 49 **Participants**

50  
51 The trial will be conducted in people's homes located in metropolitan cities and adjoining rural areas, in  
52 Australia, Germany, Poland, Norway, and the United Kingdom.  
53  
54

55 Inclusion criteria:

- 56 • dyads (cohabiting) who are close in relationship and where one member has a diagnosis of dementia  
57 according to ICD-10 criteria (Alzheimer's Disease [AD], Frontotemporal Dementia, Vascular  
58  
59  
60

1  
2 Dementia [VD], Lewy Body Disease, or mixed dementia) as determined by a clinician experienced in  
3 diagnosing dementia,[7]. Close in relationship refers to a CG who may be a sibling, spouse, adult child,  
4 friend, niece or nephew or any person who has a close relationship to the PwD, that is, anyone who is  
5 not a formal paid caregiver.  
6  
7

- 8  
9  
10 • dyads where the PwD has a Neuropsychiatric Inventory-Questionnaire (NPI-Q) Score of  $\geq 6$  (from a  
11 maximum score of 36) and MMSE scores  $\leq 24$  as research indicates that NPI-Q scores  $\geq 6$  occur in  
12 PwD who have high Mini Mental State Examination Scores,[23]. NPI-Q will form part of the  
13 screening process, with a trained assessor administering the NPI-Q in the dyad's home prior to  
14 enrolment in the study.  
15  
16  
17  
18  
19

20  
21 Exclusion criteria:

- 22  
23 • dyads where either or both the CR or PwD have significant hearing impairments that are not resolved  
24 through the use of a hearing aid device and limit their capacity to enjoy musical experiences. There will  
25 be no further exclusions.  
26  
27  
28  
29

### 30 31 **Interventions**

32  
33 *Music Intervention.* Dyads randomly allocated to the MI will receive a 2-hour home-based MI training session  
34 that aims to engage the PwD during and following the MI. Using a carefully prepared and detailed intervention  
35 manual, a qualified music therapist will instruct the CG on methods and strategies for using music to assist the  
36 PwD to become calmer (if agitated) or more energised (if apathetic). CGs will be instructed on how to choose  
37 music and engage the PwD in effective and respectful discussions with the aim of evoking autobiographical  
38 memories and sharing meaningful experiences,[24]. Strategies to engage the PwD and create opportunities for  
39 meaningful dialogue with the PwD will be provided, as well as training CGs to notice the PwD's positive and  
40 negative responses to music. The activities to be taught comprise: a) singing familiar/preferred songs followed  
41 by CG-facilitated discussions about the meaning of the songs for the dyad, the PwD, and significant others, and  
42 any associated memories,[20, 25]; b) movement to music (e.g. upper body and arms imitating familiar dance  
43 movements to music) to assist in regulating arousal,[11]; c) playing instruments (or using household items to  
44 make rhythmic sounds) while listening to music; and d) listening to familiar/preferred relaxing or enlivening  
45 music dependent upon BPSD present at the time to assist in regulating arousal,[20]. CGs are then instructed to  
46 deliver the MI at least 5x per week for approximately 30 mins over a 12-week period. After each MI session,  
47  
48  
49  
50  
51  
52  
53  
54  
55  
56  
57  
58  
59  
60

1 they will diarise their experiences, including documenting which activities were used, session time and  
2 duration, and any positive or negative responses during and after the session. Such data (number of times per  
3 week, average duration, activities adopted) will be used to monitor and improve adherence to the protocol. At  
4 3-weeks and 6-weeks post allocation, the MI trainer will return to the dyad's home for a second and third  
5 training session (Figure 2). These sessions aim to further extend CG knowledge and skills, troubleshoot any  
6 issues, and improve protocol adherence. Fortnightly phone conversations with CGs will be used to support the  
7 CG and remind them to complete the diaries (to mitigate risk and maximise participant engagement, retention,  
8 and protocol adherence).

9  
10  
11  
12  
13  
14  
15  
16  
17  
18  
19  
20  
21 *Reading Intervention (active control)*. Dyads randomly allocated to the RI group will receive a 2-hour RI  
22 instruction session which aims to engage the PwD during and following the RI. The reading activities will be  
23 taught by a qualified practitioner, following a carefully prepared and detailed intervention manual. These  
24 activities are based on RI methods commonly used with PwD including: a) CG reading aloud to PwD; b) PwD  
25 reading aloud (or reciting poems, prayers, prose, short stories, fairy tales, when unable to read) to CG; c)  
26 listening to audio books and d) discussion of the text and personal responses,[17-19]. Strategies to engage the  
27 PwD and create opportunities for meaningful dialogue with the PwD will be provided as well as guidance on  
28 selecting reading material accessible to the PwD's level of cognitive impairment. CGs are then instructed to  
29 deliver RI at least 5x per week for 30 mins over 12-weeks and diarise their reading activities to record activity  
30 and adherence. Diaries will serve as a mechanism to monitor adherence to the protocol. At 3-weeks and 6-  
31 weeks post allocation, as per the MI condition, the RI trainers will return to the dyad's home for a second  
32 and third training session with the intention of further extending CG knowledge and skills and to monitor and  
33 improve intervention protocol adherence. Fortnightly phone conversations with CGs will be used to support  
34 the CG and remind them to complete the diaries (to mitigate risk of noncompletion). Like the MI condition,  
35 phone calls also aim to maximise participant engagement, retention, and protocol adherence.

36  
37  
38  
39  
40  
41  
42  
43  
44  
45  
46  
47  
48  
49  
50  
51  
52  
53  
54 For both the MI and RI, at screening, the assessors will determine the music and reading resources already  
55 available to the dyads. Should they require resources (for example large print books, mp3 players/speakers,  
56 downloadable music), the research team will loan these resources for the dyads, free of charge.

1  
2 *Standard Care.* Dyads randomly allocated to this condition will not be trained in either MI or RI but will be  
3  
4 instructed to care for the PwD in their usual manner. This consists of receiving medical, therapeutic and  
5  
6 personal care, as well as participating in usual leisure activities.  
7  
8  
9

10 *Discontinuing or Modifying Interventions.* Where there is a significant deterioration in the health of the PwD  
11  
12 and/or the CG that leads to hospital admission or care home admission, the MI or RI will be discontinued. If  
13  
14 there is a change in primary CG partway through the study, the dyad will be withdrawn from the study.  
15  
16  
17

18 *Training and assessment of fidelity.* Given the MI and RI will be delivered in five different countries with  
19  
20 different healthcare philosophies and practices, a careful plan for fidelity of the study design, treatment  
21  
22 integrity, treatment differentiation, treatment receipt, and treatment enactment has been developed. A  
23  
24 standardised manual for MI and RI has been developed and agreed upon by all countries prior to  
25  
26 implementation. Fidelity in this study is complex as it will involve assessing fidelity of the MI and RI  
27  
28 training session, but also fidelity of the CG-directed program. Delivery of MI and RI training by research  
29  
30 staff will be videorecorded and a randomised selection of 20% of recordings from every site will be reviewed  
31  
32 by members of the research team and cross-checked with the MI and RI protocol manuals using a custom  
33  
34 fidelity checklist. Individualised supervision and monitoring of intervention trainers will be employed to  
35  
36 minimise “drift” in trainer differences and control for differences in trainer styles. CG diaries will be used to  
37  
38 determine whether the MI and RI protocols have been adhered to and the success of treatment enactment.  
39  
40  
41  
42  
43

## 44 **Outcomes**

45  
46 At baseline, demographic data (age, gender, and dyad history) of both CG and PwD will be collected as well  
47  
48 as diagnostic information of PwD (ICD-10).

49  
50  
51 Where possible, core outcomes ([www.comet-initiative.org](http://www.comet-initiative.org)) for psychosocial intervention research in  
52  
53 dementia care were selected,[26]. For the PwD, the following measures were selected:

- 54 • Behavioural and Psychological Symptoms of Dementia - The NPI-Q is the most highly regarded and  
55  
56 used measure for determining the severity of BPSD in clinical trials. The 12-item scale is used to assess  
57  
58 the behaviour of PwD across 12 domains of commonly displayed BPSD. The scale has been translated  
59  
60



1  
2 into more than 40 languages, has been cross-validated against the NPI as the gold standard ( $r=0.73$ ) and  
3  
4 has demonstrated good validity (sensitivity = 74.1%, specificity = 79.5%), internal reliability ( $\alpha= 0.783$ )  
5  
6 and excellent test-retest reliability ( $r = 0.99$ ),[27-28]. Total severity scores range from 0 to 36; higher  
7  
8 values are indicative of higher severity. Distress scores range from 0 to 60; higher values represent  
9  
10 higher levels of distress. CGs will self-complete the NPI-Q with guidance from the research assessor if  
11  
12 required.

- 13  
14  
15 • Depression – The Montgomery Asberg Depression Rating Scale,[29] (MADRS) will be used to assess  
16  
17 the severity of depression. The 10-item scale with each item's scores ranging from 0 (no symptoms) –6  
18  
19 (severe symptoms) is determined through an assessor-led interview with the proxy, in this study, the  
20  
21 CG. Total score ranges from 0 to 60 with higher scores indicating more severe depression. MADRS has  
22  
23 been found to have good constructive validity, internal reliability ( $\alpha= 0.84$ ), and test-retest reliability  
24  
25 (ICC=0.78). The scale has been widely used in clinical trials,[29].
- 26  
27 • Quality of Life (QoL) – The QoL of PwD will be determined by administering the Quality of Life-  
28  
29 Alzheimer's Disease (QoL-AD),[30] scale. The QoL-AD is recommended by the COS,[26] for use in  
30  
31 clinical trials. It is a simple 13-item self-report measure, which is rated on a 4-point scale, within the  
32  
33 structure of a verbally delivered interview. Total scores range from 13 (poor quality of life) to 52  
34  
35 (excellent quality of life in all areas). Studies indicate that the measure can demonstrate sensitivity to  
36  
37 psychosocial intervention, correlates with health-utility measures,[31], has excellent interrater reliability  
38  
39 ( $\kappa > 0.70$ ) and internal consistency ( $\alpha = 0.82$ ). The QoL-AD is reliable when used with people with  
40  
41 MMSE scores of  $\geq 10$ . Both a CG proxy and PwD self-report (if possible) will be collected at the 3-  
42  
43 timepoints. If the PwD is able to complete the MMSE at all time points, then their response will be  
44  
45 included in the analysis. If not, then the proxy version at all time points will be used.
- 46  
47 • Cognition - The Mini-Mental State Examination (MMSE) will be administered pre and post intervention  
48  
49 (Time 1 and Time 2) to monitor any change in the PwD's cognition and to examine the relationship  
50  
51 between cognitive decline, BPSD, depression and response to different conditions. The MMSE is a 30-  
52  
53 point questionnaire used to estimate the severity and progression of cognitive impairment and to follow  
54  
55 the course of cognitive changes in an individual over time,[32]. The MMSE tests for orientation,  
56  
57 attention, memory, language and visual-spatial skills. It is reliable and valid for both diagnosis and  
58  
59 longitudinal assessment. Higher scores indicate better cognitive capacity with scores of 24-30 indicating  
60

1  
2 no cognitive impairment; 19-23 indicating mild cognitive impairment; 10-18 indicating moderate  
3 cognitive impairment; and scores <10 indicating severe cognitive impairment. MMSE scores will be  
4 determined through assessor-led interviews with PwD participants.  
5  
6  
7  
8  
9

10  
11 For the CG, the following measures were selected:

- 12  
13 • Symptoms of depression – CG depression will be measured using the Patient Health Questionnaire–9  
14 (PHQ-9),[33]. This self-completed 9-item questionnaire asks the participant about how often they  
15 experience the descriptors over the last 2 weeks. Each item is scored from 0 (not at all) to 3 (nearly  
16 every day). Total scores range from 0 to 27. The PHQ–9 has comparable sensitivity and specificity to  
17 other depression measures; high internal reliability ( $\alpha = 0.89$ ), and test-retest reliability ( $r = 0.84$ ).  
18  
19
- 20 • Resilience – CG resilience will be measured using the self-completed 14-item Resilience Scale (RS-  
21 14),[34]. Total scores range from 14 to 98, with higher scores indicative of higher resilience. The  
22 measure has been tested and has good concurrent validity, good internal reliability ( $\alpha = 0.8 - 0.90$ ), good  
23 construct validity, test-retest reliability ( $r = 0.67$  to  $0.84$ ) and has been translated into 36 languages,[35].  
24  
25
- 26 • Competence - CG competence will be measured using the self-completed Short Sense of Competence  
27 Questionnaire (SSCQ),[36]. The 7-items cover 3 main domains; self-reported feelings about how the  
28 caregiver role impacts the CG's personal life, satisfaction with their performance as a CG, and their  
29 satisfaction with how the PwD responds to the CG. Total scores ranged from 7 to 35 with higher scores  
30 indicative of a stronger sense of competence. The measure has been cross-validated with the longer 35-  
31 item standard Sense of Competence Questionnaire ( $r = 0.88$ ) and has been shown to have high  
32 reliability (Cronbach's  $\alpha = 0.76$ ).  
33  
34
- 35 • CG Quality of Life – QoL of the CG will be assessed using the self-completed Assessment of Quality of  
36 Life-6D instrument (AQoL-6D),[37] Each item asks participants to describe their situation over the past  
37 week by ticking the box (from 4 to 6 choices) that best reflects their situation. The psychometric  
38 property testing found the instrument to be reliable and valid, and has greater sensitivity to the  
39 psychosocial dimensions of QoL than other utility instruments,[37-38].  
40  
41
- 42 • Relationship quality – CG perception quality of the CG and PwD relationship will be captured by  
43 asking the CG to self-complete the Quality of Caregiver-Patient Relationship (QCPR),[39]. This 14-  
44  
45  
46  
47  
48  
49  
50  
51  
52  
53  
54  
55  
56  
57  
58  
59  
60

1  
2 item measure aims to capture the strength of the quality of relationship between the PwD and CG, from  
3 the CG's perspective. Total scores range from 14 to 70, with higher scores indicating a higher quality  
4 relationship. The measure has demonstrated acceptable internal consistency ( $\alpha = 0.82$ ) and concurrent  
5 validity.  
6  
7  
8  
9

- 10 • Adherence to the MI/RI intervention will be measured through CG completed diaries. CGs are deemed  
11 adherent to the protocol if they have provided >2 sessions of MI or RI per week, for at least 30minutes  
12 in total. Data on the general use of reading and music by all dyads (including SC) will be collected at  
13 post-test. For each diary entry, CGs will be asked to record the date, start and stop time of MI/RI  
14 engagement, types of activities used, their experiences during the session (negative, neutral, positive,  
15 unsure), effects from the intervention for the remainder of the day until the PwD goes to bed for the  
16 evening sleep (negative, neutral, positive, unsure), and any comments. This data will be used in  
17 qualitative analyses to gain more nuanced understandings of how the activities are perceived and how  
18 these may change over the course of the intervention period.  
19  
20  
21  
22  
23  
24  
25  
26  
27  
28  
29  
30

31 To evaluate the cost-effectiveness of MI compared to RI and SC on PwD and CG, the outcomes will be  
32 measured using:  
33

- 34 • Quality Adjusted Life-Years – The EuroQol instrument (EQ-5D-5L),[40] is a generic quality of life  
35 measure that is internationally used to determine the quality-adjusted life-years (QALYs) and used for  
36 clinical and economic appraisal,[40]. The measure is not cognitively demanding and quick to complete.  
37 Scores from the five items are not combined arithmetically but using preference weights which arrive at  
38 an overall quality of life score. These range from lower than 0 (worse than death) to 1 (best possible).  
39 CGs will complete the measure as a proxy for the PwD and self-report their own health status,[26, 41-44].  
40  
41  
42  
43  
44  
45  
46  
47  
48 • Resource Utilization in Dementia (RUD) - The RUD is a standardized instrument for resource use data  
49 collection in dementia, designed to collect data from formal and informal care across different countries. The  
50 RUD assesses resource use of both PwD and CG, including time expended in different daily tasks, and  
51 consists of baseline and a follow-up assessment,[45]. The RUD will be completed through assessor-led  
52 interviews with CGs.  
53  
54  
55  
56  
57  
58  
59  
60

CGs will be provided with a set of guidelines as to how to complete the diary and all self-report and proxy measures. The schedule for enrolment, baseline assessments, all outcome measures, and intervention trainings is outlined in Figure 3.

<<INSERT FIGURE 3 ABOUT HERE

**Figure 3. Schedule of enrolment, interventions, and assessments >>**

### **Sample size**

A total of 165 dyads in each arm of the study, or 495 in total, are needed to detect a difference of 3-points in NPI-Q total severity score (primary outcome) between the MI plus SC and SC arm (primary comparison) at 12-weeks (primary time point). This assumes 90% power, a two-tailed significance level of 5%, equal standard deviation (SD, 7.5 points) in the groups, no correlation between baseline and 12 weeks (conservative), and 20% attrition. A 3-point change from baseline in NPI-Q total severity score is considered a clinically meaningful difference,[46]. A conservative SD of 7.5 points is based on that observed in 1026 community-living participants across eight European countries with mild to severe dementia (SD 5.9 to 6.5 points),[47-48]. A conservative drop-out proportion (e.g. withdrawn by CG, physician, or death) of 20% is based on a reported 5.6% (95% CI [1.8%, 12.6%]) drop-out at 3 months in 89 in-patients with mild to moderate dementia in Finland participating in a three-arm RCT of singing, music, or usual care,[25].

### **Recruitment**

Randomisation will aim to be distributed equally across five countries (Australia, United Kingdom, Norway, Germany, and Poland) to support between-country analyses. Participants will be recruited through established partner organisations in each country who coordinate CG support groups. Staff from the partner organisations will introduce the trial to potential participants and invite them to participate in the study. They will be given an information sheet explaining the main aspects of the trial and provided with contact details of the research team who will be available to answer further questions.

### **Randomisation, Allocation Concealment, and Blinding**

1  
2 The randomisation schedule will be computer-generated by an independent statistician and allocation will be  
3 carried out through a centralised randomisation service. Block permuted randomisation with stratification by  
4 participating site will be used, so that treatment balance within site is achieved. Dyads who meet the inclusion  
5 criteria and none of the exclusion criteria will be randomised 1:1:1 into MI, RI, or SC. Randomisation will  
6 occur after the eligibility checking, informed consent, and baseline assessment have been completed. Informed  
7 consent/assent will be obtained by a blinded assessor prior to the baseline assessment. The study coordinator in  
8 each country will be informed of the allocation and will inform dyads of their group allocation by post,  
9 phone, or email.

10 Participant dyads cannot be fully blinded due to the active nature of the interventions however, we will avoid  
11 publicizing our hypotheses that MI may be superior to SC only and RI. Plain language statements and  
12 consent forms will use neutral wording to maintain equipoise and to avoid expectancy effects. Blinded  
13 assessors will collect participants' data at baseline, post-intervention, and follow-up. Diaries will be returned  
14 in sealed envelopes to minimise risk of assessors becoming unblinded. The success of assessor blinding will  
15 be checked by asking the assessor to guess the treatment assignment (or say "I do not know") after the post-  
16 intervention and follow-up periods. This treatment guess will then be compared against the actual treatment  
17 and the blinding index derived. The independent statistician will not reveal the allocation codes to any of the  
18 study team except for the study coordinators of each country in charge of group allocation. All other  
19 investigators and the study statistician will remain blinded until the database has been cleaned, a blinded data  
20 review has taken place, and the database is ready for analysis.

## 21 22 23 24 25 26 27 28 29 30 31 32 33 34 35 36 37 38 39 40 41 42 43 44 **Analysis**

45 Analyses will be performed on an intention-to-treat basis including all randomised dyads in their allocated  
46 study arm. The primary outcome (NPI-Q severity total score) will be analysed using a constrained longitudinal  
47 data analysis (cLDA) model,[49] with response consisting of all scores (baseline, 12 weeks and 6-months) and  
48 the model including factors representing intervention, time, intervention by time interaction, and site with the  
49 restriction of a common baseline mean score across interventions. This refers to the assumption that at baseline  
50 there are no differences between the interventions in the mean score, thus assuming the randomisation was  
51 effective. This assumption will be enforced statistically in the statistical model. The absolute difference  
52 between MI and SC and MI and RI in mean change from baseline will be estimated (including two-sided 95%

1  
2 confidence interval) at 12 weeks (primary time point). A hierarchical fixed sequence testing procedure will  
3  
4 allow testing of MI versus RI at 12 weeks at 5% if the comparison of MI versus SC at 12 weeks has a p-value <  
5  
6 0.05. Secondary analyses will consist of a model adjusted for potential confounders (types of dementia and  
7  
8 gender). The cLDA model provides valid inference if the missing data mechanism is at most missing at  
9  
10 random. In addition to the intention-to-treat effect we will obtain the complier average causal effect by making  
11  
12 use of the collected adherence data,[50]. Analyses similar to the primary outcome will be applied to the  
13  
14 secondary outcomes for PwD and CGs. Heterogeneity of the intervention effect across subgroups (gender of  
15  
16 the PwD/CG, types of dementia, severity of dementia, time of onset dementia, length of time having dementia,  
17  
18 relationship between PwD and CG, country) will be assessed by means of interaction tests. The number and  
19  
20 percentage of PwDs and CGs with adverse events will be summarized by intervention group.  
21  
22  
23  
24

25 Cost-effectiveness analysis in a societal perspective will be performed separately for each country using the  
26  
27 utilities generated by EQ-5D-5L for both PwD and CG and country-specific weights, to estimate a combined  
28  
29 QALY score using a generalized linear model adjusted by the baseline. Health and informal care resources  
30  
31 consumed by PwD will be assessed using the RUD and unit cost by country. A generalized linear mixed model  
32  
33 will be used to estimate the main predictors of the total costs in the MI, RI and SC groups. Incremental cost-  
34  
35 effectiveness ratio will be calculated using the cost and effect estimates comparing MI with RI and SC. The  
36  
37 uncertainty around the incremental cost-effectiveness ratio will be estimated using bootstrapping (1000  
38  
39 replications) adjusting to control variables.  
40  
41  
42  
43

#### 44 **Patient and public involvement**

45  
46 All countries have involved user and advocacy organisations in the development and design of the study. The  
47  
48 UK, Australia, and Germany have been piloting work with formal and informal CGs of PwD for many years.  
49  
50 CGs and PwD have been involved designing the diaries which capture adherence data. It was imperative that  
51  
52 the diary be user-friendly, not burdensome on the CG, and yet enabled them to document both the positive  
53  
54 and negative aspects of the session. Several iterations of the diary were constructed prior to arriving at the  
55  
56 final structure. Pilot work in Australia,[14] involved interviews post-intervention to identify strengths,  
57  
58 limitations, challenges, and experiences in delivering the MI, as well as recommendations for suggested  
59  
60

1  
2 modifications to the intervention training. Representatives of advocacy groups and end users from all  
3  
4 countries will be represented on an international Participant and Public Involvement Committee.  
5  
6  
7

## 8 **Monitoring and Oversight**

9

10 A Trial Operations Committee (TOC) will comprise the principal investigator, chief investigators and  
11 clinical trial managers from each of the 5 countries, the study statistician, health economist, and a consumer  
12 representative. The TOC will meet at least 6-weekly, and will oversee all aspects of the trial delivery  
13 including strategies to support efficient and effective recruitment and retention, reviewing completeness of  
14 datasets, monitoring intervention fidelity, management of timelines and milestones, review of country-by-  
15 country progress, public and patient involvement or actions, and publication and dissemination plans. The  
16 role of the members of the TOC is to bring country-specific issues to the international team for discussion to  
17 ensure the study is being monitored and delivered according to the agreed protocols. Protocol deviations and  
18 any changes or amendments to the operational processes of the trial will be discussed and decisions made by  
19 the TOC.  
20  
21  
22  
23  
24  
25  
26  
27  
28  
29  
30  
31  
32

33 A Trial Steering Committee (TSC) will comprise of members independent of the clinical trial as well as  
34 members and representing consumers and other relevant advocacy organisations. The trial Principal  
35 Investigator (or a proxy in her absence) will also sit on the committee as a non-voting member. The  
36 Committee will meet biannually (or more often when needed) to review and monitor all aspects of the study  
37 delivery. They will draw on reports provided to them by the TOC and make recommendations to the PI and  
38 TOC about whether further actions are required.  
39  
40  
41  
42  
43  
44  
45

46 A DSMC will review the cumulative study data to evaluate the recruitment, safety, study conduct, and  
47 scientific validity and integrity of the trial. The committee consists of at least five people with strong  
48 methodological, biostatistical, and clinical expertise who are independent of the project and an end user  
49 representative. The DSMC will be provided with data on recruitment, intervention uptake, any unforeseen  
50 and/or adverse events, and review serious adverse events. The meetings will consist of an open and a closed  
51 part. In the open part, the general progress of the trial will be discussed with the principal investigator. In the  
52 closed part, the DSMC will discuss any safety concerns and if considered required, the DSMC will make  
53 recommendations to the TOC for appropriate action.  
54  
55  
56  
57  
58  
59  
60

1  
2  
3  
4 Study data will be collected and managed using REDCap® electronic data capture tools hosted at the  
5  
6 University of Melbourne,[51]. The Data Management Coordinating Center will oversee the intra-study data  
7  
8 sharing process between countries?, with input from the Data Management Subcommittee. We will develop  
9  
10 a data management manual detailing data collection protocols and provide comprehensive training of those  
11  
12 members of the research team who collect, check and enter study data. The Principal Investigator, study  
13  
14 statistician, and health economist from the University of Melbourne will be given access to the cleaned data  
15  
16 sets. Country specific lead investigators will only have access to their own country's cleaned data sets. All  
17  
18 data sets will be password-protected. To ensure confidentiality, data dispersed to project team members will  
19  
20 have any identifying information removed.  
21  
22  
23  
24

### 25 **Risk management**

26  
27 Processes have been put in place to mitigate risks. One of the most significant risks associated with the  
28  
29 project is slow recruitment. To offset the risk of slow recruitment, data is being collected across five  
30  
31 countries. If some countries have less difficulty than others in recruiting, then these countries will recruit  
32  
33 greater numbers to ensure the required sample size is obtained. Another risk identified is the heterogeneity of  
34  
35 intervention delivery. The inclusion of a detailed manual, regular supervision with interventionists, and  
36  
37 monitoring the effectiveness of interventionist training will mitigate the risk of poor intervention fidelity.  
38  
39  
40  
41  
42

### 43 **Ethics and Dissemination Plan**

44  
45 All research and clinical activities carried out for the HOMESIDE project will be in compliance with  
46  
47 fundamental ethical principles including those reflected in the Oviedo convention and the Convention for the  
48  
49 Protection of Human Rights and Fundamental Freedoms and legal requirements (Directive 95/46/EC on the  
50  
51 protection of individuals with regard to the processing of personal data and on the free movement of such  
52  
53 data; and Directives 2001/20/EC, 2005/28/EC relating to the implementation of good clinical practice in the  
54  
55 conduct of clinical trials). Ethical conduct will be managed in the following ways:

- 56  
57 • The clinical trial coordinator in each country will implement the research in full respect of European  
58  
59 /national/ institutional legal and ethical requirements and codes of practice.  
60



- Ethics approvals in each country must be obtained prior to commencement of the trial.
- Informed consent from the PwD's guardian must be obtained prior to enrolling a participant in the study. Assent from the PwD will always be sought prior to enrolment in the study.
- National and International rules on data protection will be followed. that the participating countries in HOMESIDE within the EU and EEA (UK, Germany, Poland and Norway) also relate to the General Data Protection Regulation (GDPR)(Regulation (EU) 2016/679), designed to harmonize data privacy laws across Europe, to protect and empower all EU citizens data privacy, and to reshape the way organizations across the region approach data privacy. The HOMESIDE partners have also signed a consortium agreement where they consent to follow national and international rules on collaboration, ethics and data protection.

The report on the main, pre-planned analyses of the primary endpoint and up until the 6-month follow-up will be submitted to a leading medical journal. Further publications may focus on issues such as recruitment and retention strategies for home-based programs. Publications based on qualitative interviews and video analyses will focus on barriers and facilitators for implementation and promotion of adherence to home-based programs; experiences of caregivers in delivering the programs; and the development of best practice training guidelines. In addition to publications in academic journals, a number of policy briefing papers for Government and aged care/dementia advocacy groups are planned as well as the development of training manuals and guidelines for dissemination.

### **Data Sharing**

In accordance with the Australian Code for Responsible Conduct of Research (Universities Australia, 2018), all data will be retained for retrieval and re-use in future research where participant permission is granted.

Following project completion, de-identified anonymised data (with participant consent) will be available on the Australian Data Archive <https://ada.edu.au> and listed on Research Australia's <https://researchaustralia.org> website to facilitate access for future research. Data made available will include individual-level deidentified participant data, reports on adverse events, and deidentified interview transcripts. According to the GDPR, the consortium have agreed to the reuse of data for 10 years post project completion.

## Relevance and Benefit to Society

As the majority of PwD live in the community and not in residential care settings, quality informal care for PwD is crucial for managing BPSD and enhancing quality of life. This protocol details the process for testing the effectiveness and cost-effectiveness of a CG-directed music intervention and reading intervention designed to manage the BPSD of PwD, the sense of burden and wellbeing of the CG, and provide meaningful possibilities to maintain the relationship between PwD and their CGs. We expect that with support and training, the MI will be easily implemented in the family home by CGs. With the increasing number of people living with dementia and the stress this will place on countries' economies, our project aims to test an intervention designed to keep people living at home with family CGs for as long as possible, reducing the burden for society and caregivers. Our study will be able to estimate the incremental cost-effectiveness ratio between MI and RI, MI and SC, and RI and SC. Data may support aged care policy recommendations and as the interventions will be delivered in five different countries, results will be broadly generalisable.

## Acknowledgements

Laura Blauth and Libby Flynn provided valuable comments on this protocol.

## References

1. Livingston G, Sommerlad A, Orgeta V, et al. Dementia prevention, intervention, and care. *Lancet*. 2017;390:2673-2734. doi:10.1016/S0140-6736(17)31363-6. [published Online First: 20 July 2017].
2. Papastavrou E, Kalokerinou A, Papacostas SS, et al. Caring for a relative with dementia: family caregiver burden. *J Adv Nurs*. 2007;58: 446-57.
3. O'Dwyer S, Moyle W, van Wyk S. Suicidal ideation and resilience in family carers of people with dementia: A pilot qualitative study. *Aging Ment Health*. 2013;17:753-760. doi:10.1080/13607863.2013.789001. [published Online First: 23 April 2013].
4. Li R, Cooper C, Austin A, et al. Do changes in coping style explain the effectiveness of interventions for psychological morbidity in family carers of people with dementia? A systematic review and

- 1 meta-analysis. *Int Psychogeriatr*. 2013;25:204-214. doi:10.1017/S1041610212001755. [published  
2 Online First: 22 October 2012].  
3  
4  
5  
6 5. Piersol CV, Canton K, Connor SE, et al. Effectiveness of interventions for caregivers of people with  
7 Alzheimer's disease and related major neurocognitive disorders: A systematic review. *Am J Occup  
8 Ther*, 2017;71(5): 7105180020p1-7105180020p10. doi: 10.5014/ajot.2017.027581.  
9  
10  
11  
12 6. deVugt, M. E. Stevens F, Aalten P, et al. Behavioural disturbances in dementia patients and quality  
13 of the marital relationship. *Inter. J. Geriatr Psychiatry* 2003;18:149–154.  
14  
15  
16 7. National Institute for Health and Care Excellence. NICE guidelines: Dementia: assessment,  
17 management and support for people living with dementia and their carers. Published: 20 June 2018.  
18 Available at: nice.org.uk/guidance/ng97.  
19  
20  
21  
22  
23 8. Hsu MH, Flowerdew R, Parker M, et al. Individual music therapy for managing neuropsychiatric  
24 symptoms for people with dementia and their carers: a cluster randomized controlled feasibility  
25 study. *BMC Geriatr* 2015;15:84-015-0082-4. doi.org/10.1186/s12877-015-0082-4 [published Online  
26 First: 18 July 2015].  
27  
28  
29  
30  
31 9. Fusar-Poli L, Bieleninik L, Brondino N, et al. The effect of music therapy on cognitive functions in  
32 patients with dementia: a systematic review and meta-analysis. *Ageing Ment Health* 2017;1–10.  
33 doi.org/10.1080/13607863.2017.1348474 [Published online: 10 Jul 2017].  
34  
35  
36  
37  
38 10. Zhang Y, Cai J, An L, et al. Does music therapy enhance behavioral and cognitive function in  
39 elderly dementia patients? A systematic review and meta-analysis. *Ageing Res Rev* 2017;35:1–11.  
40 doi.org/10.1016/j.arr.2016.12.003 [published Online First: 23 December 2016].  
41  
42  
43  
44 11. Ridder HM, Stige B, Qvale LG, et al. Individual music therapy for agitation in dementia: an  
45 exploratory randomized controlled trial. *Ageing Ment Health* 2013;17(6):667-678.  
46 doi:10.1080/13607863.2013.790926. [published Online First: 27 April 2013].  
47  
48  
49  
50 12. Kitwood T. Dementia reconsidered: The person comes first. Buckingham, UK: Open University  
51 Press 1997.  
52  
53  
54 13. Brooker D. Person-centred Dementia Care: Making Services Better. London: Jessica Kingsley  
55 Publishers 2007.  
56  
57  
58  
59  
60

14. Baker F, Grocke D, Pachana N. Connecting through music: A study of a spousal carerCG-directed music intervention designed to prolong fulfilling relationships in couples where one person has dementia. *Australian Journal of Music Therapy* 2012;23:4-19.
15. Hanser SB, Butterfield-Whitcomb J, Kawata M, Collins BE. Home-based music strategies with individuals who have dementia and their family caregivers. *Journal of Music Therapy* 2011 48:2–27.
16. Jacobsen JH, Stelzer J, Fritz TH, et al. Why musical memory can be preserved in advanced Alzheimer's disease. *Brain* 2015;138:2438-2450. doi:10.1093/brain/awv135. [published Online First: 3 June 2015].
17. Longden E, Davis PM, Carroll J, et al. An evaluation of shared reading groups for adults living with dementia: preliminary findings. *J Public Ment Health* 2016;15(2):75-82. doi:10.1108/JPMH-06-2015-0023 [published Online First: June 2016].
18. Kawashima R, Okita K, Yamazaki R, et al. Reading Aloud and Arithmetic Calculation Improve Frontal Function of People With Dementia. *J Gerontol A Biol Sci Med Sci* 2005;60(3):380–384.
19. Vink AC, Birks JS, Bruinsma MS, et al. Music therapy for people with dementia. *Cochrane Database Syst Rev* 2004;3. doi:10.1002/14651858.CD003477.pub2. [published Online First: 20 October 2003].
20. Ray KD, Mittelman MS. Music therapy: A nonpharmacological approach to the care of agitation and depressive symptoms for nursing home residents with dementia. *Dementia* 2017;16(6):689-710. doi.org/10.1177/1471301215613779 [published Online First: 29 October 2015].
21. Aalbers S, Fusar-Poli L, Freeman RE, et al. Music therapy for depression. *Cochrane Database Syst Rev* 2017;11. doi:10.1002/14651858.CD004517.pub3. [published Online First: 16 November 2017].
22. van der Steen JT, van Soest-Poortvliet MC, van der Wouden JC. Music-based therapeutic interventions for people with dementia. *Cochrane Database Syst Rev* 2017;5. doi:10.1002/14651858.CD003477.pub3. [published Online First: 02 May 2017].
23. Siafarikas N, Selbaek G, Fladby T, et al. Frequency and subgroups of neuropsychiatric symptoms in mild cognitive impairment and different stages of dementia of Alzheimer's Disease. *Int Psychogeriatr* 2018;30(1):103-113. doi:10.1017/S1041610217001879. [published Online First: 20 September 2017].

- 1  
2 24. Baird A, Thompson WF. The Impact of Music on the Self in Dementia. *J Alzheimers*  
3  
4 *Dis* 2018;61(3):827-841. doi:10.3233/JAD-170737. [published Online First: 9 January 2018].  
5
- 6 25. Särkämö T, Tervaniemi M, Laitinen S, et al. Cognitive, emotional, and social benefits of regular  
7  
8 musical activities in early dementia: randomized controlled study. *Gerontologist* 2014;54(4):634-  
9  
10 650. doi: 10.1093/geront/gnt100. [published Online First: 5 September 2013].  
11
- 12 26. Moniz-Cook E, Vernooij-Dassen M, Woods R, et al. A European consensus on outcome  
13  
14 measures for psychosocial intervention research in dementia care. *Aging Ment Health*  
15  
16 2008;12(1):14-29. doi:10.1080/13607860801919850 [published Online First: 25 February 2008].  
17
- 18 27. Kaufer DI, Cummings JL, Ketchel P, et al. Validation of the NPI-Q, a brief clinical form of the  
19  
20 Neuropsychiatric Inventory. *J Neuropsychiatry and Clin Neurosci* 2000;12:233-239.  
21
- 22 28. Wong A, Cheng ST, Lo ES, et al. Validity and reliability of the Neuropsychiatric Inventory  
23  
24 Questionnaire version in patients with stroke or transient ischemic attack having cognitive  
25  
26 impairment. *J Geriatr Psychiatry Neurol* 2014;27(4):247-252. doi:10.1177/0891988714532017.  
27  
28 [published Online First: 24 April 2014].  
29
- 30 29. Fantino B, Moore N. The self-reported Montgomery-Åsberg depression rating scale is a useful  
31  
32 evaluative tool in major depressive disorder. *BMC Psychiatry* 2009;9:26. doi.org/10.1186/1471-  
33  
34 244X-9-26. [published Online First: 27 May 2009].  
35  
36
- 37 30. Logsdon R, Gibbons LE, McCurry SM, et al. Assessing Quality of Life in older adults with  
38  
39 cognitive impairment. *Psychosom Med* 2002;64(3):510–519.  
40
- 41 31. Thorgrimsen L, Selwood A, Spector A, et al. Whose quality of life is it anyway: The validity and  
42  
43 reliability of the Quality of Life-Alzheimer's Disease scale. *Alzheimer Dis Assoc Disor*  
44  
45 2003;17(4):201-208.  
46  
47
- 48 32. Pangman VC, Sloan J, Guse L. An Examination of Psychometric Properties of the Mini-Mental  
49  
50 Status Examination and the Standardized Mini-Mental Status Examination: Implications for Clinical  
51  
52 Practice. *Appl Nurs Res* 2000;13(4):209-213. doi:10.1053/apnr.2000.9231. [published Online First:  
53  
54 November 2000].  
55
- 56 33. Kroenke K, Spitzer RL, Williams JB, et al. The PHQ-9: Validity of a brief depression severity  
57  
58 measure. *J Gen Intern Med* 2001;16(9):606-613.  
59  
60

- 1  
2 34. Cosco K, Kaushal A, Richards M, et al. Resilience measurement in later life: A systematic review  
3  
4 and psychometric analysis. *Health Qual Life Outcomes* 2016. doi:10.1186/s12955-016-0418-6  
5  
6 [published Online First: 28 January 2016].  
7
- 8 35. Wagnild G, Young H. Development and psychometric evaluation of the Resilience Scale. *J Nurs*  
9  
10 *Meas* 1993;1(2):165-178.  
11
- 12 36. Vernooij-Dassen MJ, Felling AJ, Brummelkamp E. Assessment of caregiver's competence in dealing  
13  
14 with the burden of caregiving for a dementia patient: a Short Sense of Competence Questionnaire  
15  
16 (SSCQ) suitable for clinical practice. *J Am Geriatr Soc* 1999;47(2):256-257.  
17
- 18 37. Richardson J, Peacock S, Hawthorne G, et al. Construction of the descriptive system for the  
19  
20 assessment of quality of life AQoL-6D utility instrument. *Health Qual Life Outcomes* 2012;10(38).  
21  
22 doi:10.1186/1477-7525-10-38. [published Online First: 17 April 2012].  
23
- 24 38. Richardson J, Iezzi A, Khan MA, et al. Cross-national comparison of twelve quality of life  
25  
26 instruments: MIC Paper 2 Australia. Center for Health Economics. Victoria, Australia: Monash  
27  
28 University 2012.  
29
- 30 39. Spruytte N, Van Audenhove C, Lammertyn F, et al. The quality of the caregiving relationship in  
31  
32 informal care for older adults with dementia and chronic psychiatric patients. *Psychol Psychother*  
33  
34 2002;75(3):295-311.  
35
- 36 40. Herdman M, Gudex C, Lloyd A, et al. Development and preliminary testing of the new five-level  
37  
38 version of EQ-5D (EQ-5D-5L). *Qual Life Res* 2011;20(10):1727-1736. doi: 10.1007/s11136-011-  
39  
40 9903-x. [published Online First: 9 April 2011].  
41
- 42 41. EuroQol Group. EuroQol-a new facility for the measurement of health-related quality of life. *Health*  
43  
44 *Policy* 1990;16(3):199-208.  
45
- 46 42. Orgeta V, Edwards RT, Hounsome B, et al. The use of the EQ-5D as a measure of health-related  
47  
48 quality of life in people with dementia and their carers. *Qual Life Res* 2015;24(2):315-324.  
49  
50 doi:10.1007/s11136-014-0770-0. [published Online First: 17 August 2014].  
51
- 52 43. Kunz S. Psychometric properties of the EQ-5D in a study of people with mild to moderate  
53  
54 dementia." *Qual Life Res* 2010;19(3):425-434. doi:10.1007/s11136-010-9600-1. [published Online  
55  
56 First: 10 February 2010].  
57  
58  
59  
60

- 1  
2 44. Arons AM, Krabbe PFM, Schölzel-Dorenbos CJM, et al. Quality of life in dementia: a study on  
3 proxy bias. *BMC Med Res Methodol* 2013;13:110. doi:10.1186/1471-2288-13-110. [published  
4 Online First: September 2013].  
5  
6  
7  
8 45. Wimo A, Gustavsson A, Jönsson L., et al. Featured Article: Application of Resource Utilization in  
9 Dementia (RUD) instrument in a global setting. *Alzheimers Dement* 2013;9(4):9429-9435.e17.  
10 doi:10.1016/j.jalz.2012.06.008. [published Online First: 9 November 2012].  
11  
12  
13  
14 46. Mao HF, Kuo CA, Huang WN, et al. Values of the minimal clinically important difference for the  
15 Neuropsychiatric Inventory Questionnaire in individuals with dementia. *J Am Geriatr Soc*  
16 2015;63(7):1448-1452. doi:10.1111/jgs.13473. [published Online First: 5 June 2015].  
17  
18  
19 47. Giebel CM, Sutcliffe C, Stolt M, et al. Deterioration of basic activities of daily living and their  
20 impact on quality of life across different cognitive stages of dementia: A European study. *Int*  
21 *Psychogeriatr* 2014;26(8):1283-1293. doi:10.1017/S1041610214000775. [published Online First: 1  
22 May 2014].  
23  
24  
25 48. Howard R, Phillips P, Johnson T, et al. Determining the minimum clinically important differences  
26 for outcomes in the DOMINO trial. *Int J Geriatr Psychiatry* 2011;26:812-817.  
27 doi:10.1002/gps.2607. [published Online First: 16 September 2010].  
28  
29  
30 49. Liang Z, Zeger S. Longitudinal data analysis of continuous and discrete responses for prepost  
31 designs. *The Indian Journal of Statistics* 2000;62:134-148.  
32  
33  
34 50. Angrist JD, Imbens GW, Rubin DB. Identification of causal effects using instrumental variables. *J*  
35 *Am Stat Assoc* 1996;91(434):444-455.  
36  
37  
38 51. Harris PA, Taylor R, Thielke R, et al. Research electronic data capture (REDCap) - A metadata-  
39 driven methodology and workflow process for providing translational research informatics support. *J*  
40 *Biomed Inform* 2009;42:377-381. doi:10.1016/j.jbi.2008.08.010. [published Online First: 30  
41 September 2008].  
42  
43  
44  
45  
46  
47  
48  
49  
50  
51  
52  
53  
54  
55  
56  
57  
58  
59  
60

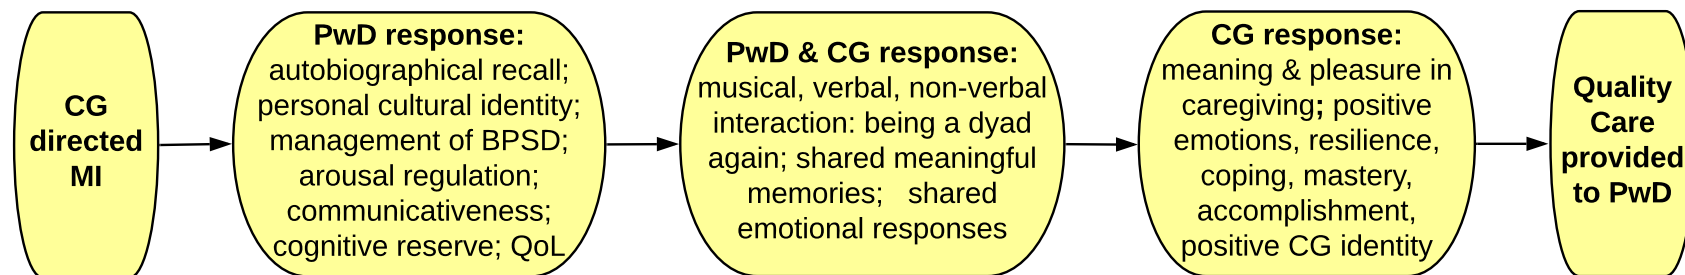

1  
2  
3  
4  
5  
6  
7  
8  
9  
10  
11  
12  
13  
14  
15  
16  
17  
18  
19  
20  
21  
22  
23  
24  
25  
26  
27  
28  
29  
30  
31  
32  
33  
34  
35  
36  
37  
38  
39  
40  
41  
42  
43  
44  
45  
46  
47  
48  
49



1  
2  
3  
4  
5  
6  
7  
8  
9  
10  
11  
12  
13  
14  
15  
16  
17  
18  
19  
20  
21  
22  
23  
24  
25  
26  
27  
28  
29  
30  
31  
32  
33  
34  
35  
36  
37  
38  
39  
40  
41  
42  
43  
44  
45  
46  
47  
48

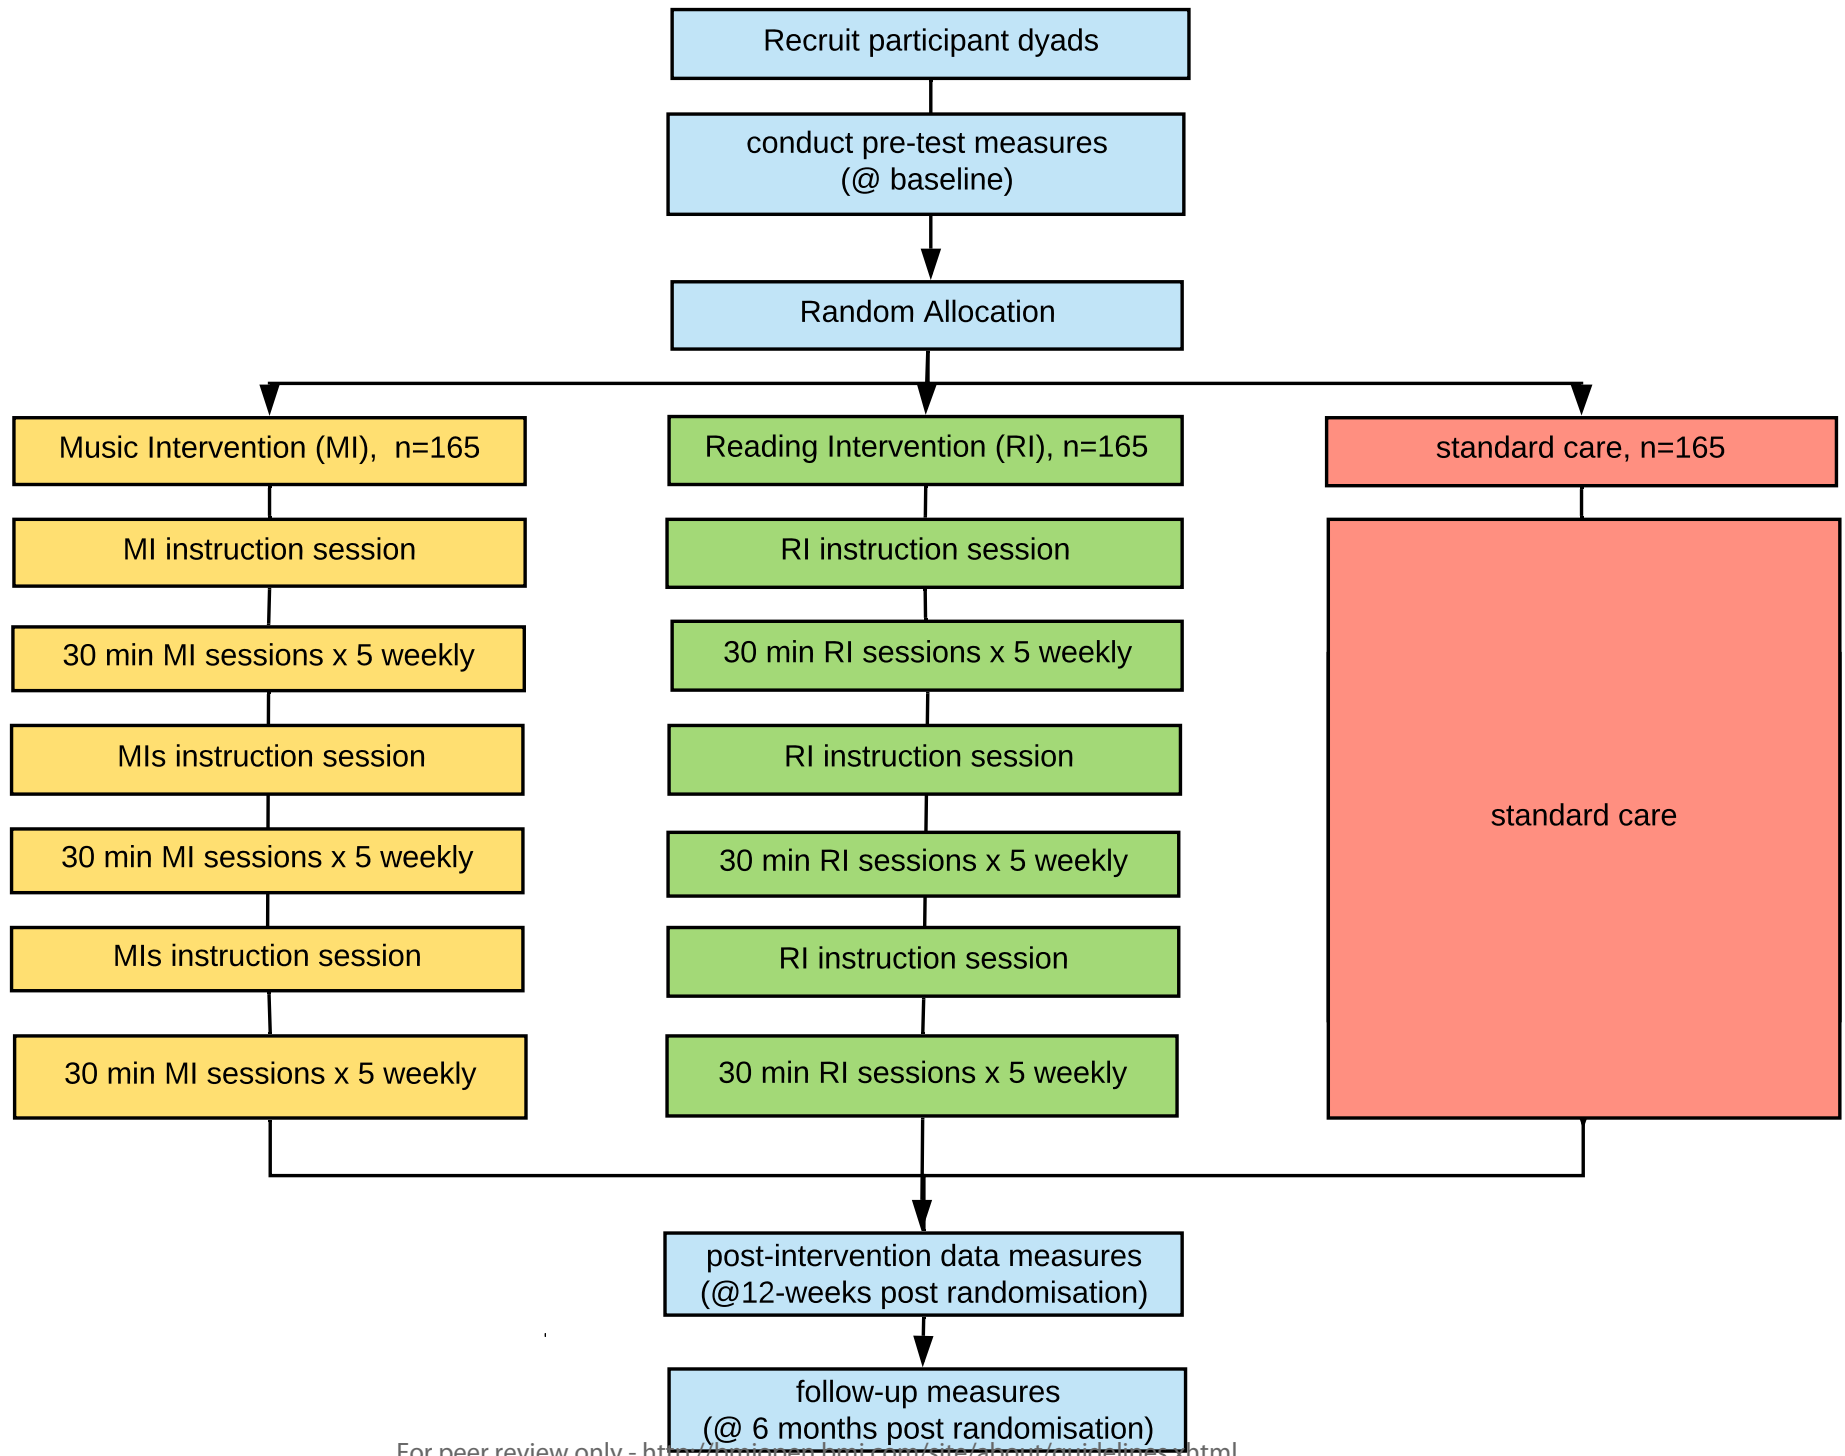

|                                                            | Enrolment              | Allocation | Intervention      |                     |                     | Post-Intervention   | Follow-up            |
|------------------------------------------------------------|------------------------|------------|-------------------|---------------------|---------------------|---------------------|----------------------|
| TIMEPOINT                                                  | -1day<br>(-7- -1 days) | 0          | 1day (+/- 7 days) | Day 21 (+/- 7 days) | Day 42 (+/- 7 days) | Day 90 (+/- 7 days) | Day 180 (+/- 7 days) |
| <b>ENROLMENT:</b>                                          |                        |            |                   |                     |                     |                     |                      |
| Eligibility screen                                         | X                      |            |                   |                     |                     |                     |                      |
| Informed consent (or assent)                               | X                      |            |                   |                     |                     |                     |                      |
| Dyad: allocation                                           |                        | X          |                   |                     |                     |                     |                      |
| <b>INTERVENTIONS:</b>                                      |                        |            |                   |                     |                     |                     |                      |
| <i>Music Intervention Training</i>                         |                        |            | X                 | X                   | X                   |                     |                      |
| <i>Reading Intervention Training</i>                       |                        |            | X                 | X                   | X                   |                     |                      |
| <b>ASSESSMENTS:</b>                                        |                        |            |                   |                     |                     |                     |                      |
| <b>PERSON WITH DEMENTIA</b>                                |                        |            |                   |                     |                     |                     |                      |
| <i>sociodemographic information</i>                        | X                      |            |                   |                     |                     |                     |                      |
| <i>MMSE (self)</i>                                         | X                      |            |                   |                     |                     | X                   |                      |
| <i>dementia diagnosis (proxy)</i>                          | X                      |            |                   |                     |                     |                     |                      |
| <i>NPI-Q (proxy)</i>                                       | X                      |            |                   |                     |                     | X                   | X                    |
| <i>MADRS (proxy)</i>                                       | X                      |            |                   |                     |                     | X                   | X                    |
| <i>QoL-AD (proxy and self)</i>                             | X                      |            |                   |                     |                     | X                   | X                    |
| <i>EQ-5D-5L (self and proxy)</i>                           | X                      |            |                   |                     |                     | X                   | X                    |
| <i>Adverse events; death, hospitalisation, death of CG</i> |                        |            | X                 | X                   | X                   | X                   | X                    |
| <b>CAREGIVER</b>                                           |                        |            |                   |                     |                     |                     |                      |
| <i>sociodemographic information</i>                        | X                      |            |                   |                     |                     |                     |                      |
| <i>PHQ-9</i>                                               | X                      |            |                   |                     |                     | X                   | X                    |
| <i>RS-14</i>                                               | X                      |            |                   |                     |                     | X                   | X                    |
| <i>SSCQ</i>                                                | X                      |            |                   |                     |                     | X                   | X                    |
| <i>QPCR</i>                                                | X                      |            |                   |                     |                     | X                   | X                    |
| <i>AQoL-6D</i>                                             | X                      |            |                   |                     |                     | X                   | X                    |
| <i>EQ-5D-5L(self)</i>                                      | X                      |            |                   |                     |                     | X                   | X                    |
| <i>RUD</i>                                                 | X                      |            |                   |                     |                     | X                   | X                    |
| <b>Interviews</b>                                          |                        |            |                   |                     |                     | X                   |                      |
| <i>Diary (5xweekly diary entries for MI and RI)</i>        |                        |            | X                 | X                   | X                   | X                   |                      |
| <i>Adverse events; death, hospitalisation</i>              |                        |            | X                 | X                   | X                   | X                   | X                    |

**Figure 3. Schedule of enrolment, interventions, and assessments**

RUD - Resource Utilization in Dementia, MMSE -MiniMental State Examination Score; ICD-10 – International Classification of Diseases-10; NPI-Q – Neuropsychiatric Inventory; MADRS - Montgomery Asberg Depression Rating Scale; QoL-AD - Quality of Life-Alzheimer’s Disease; PHQ-9 - Patient Health Questionnaire–9; RS - Resilience Scale; SSCQ - Short Sense of Competence Questionnaire; AQoL-6D - Assessment of Quality of Life-6D instrument; QCPR - Quality of Caregiver-Patient Relationship; Quality Adjusted Life-Years – EQ-5D-5L The EuroQol instrument

1  
2  
3  
4  
5  
6  
7  
8  
9  
10  
11  
12  
13  
14  
15  
16  
17  
18  
19  
20  
21  
22  
23  
24  
25  
26  
27  
28  
29  
30  
31  
32  
33  
34  
35  
36  
37  
38  
39  
40  
41  
42  
43  
44  
45  
46

SPIRIT 2013 Checklist: Recommended items to address in a clinical trial protocol and related documents\*

| Section/item               | Item No | Description                                                                                                                                                                                                                                                                              | Addressed on page number |
|----------------------------|---------|------------------------------------------------------------------------------------------------------------------------------------------------------------------------------------------------------------------------------------------------------------------------------------------|--------------------------|
| Administrative information |         |                                                                                                                                                                                                                                                                                          |                          |
| Title                      | 1       | Descriptive title identifying the study design, population, interventions, and, if applicable, trial acronym                                                                                                                                                                             | _____ 1                  |
| Trial registration         | 2a      | Trial identifier and registry name. If not yet registered, name of intended registry                                                                                                                                                                                                     | _____ 1                  |
|                            | 2b      | All items from the World Health Organization Trial Registration Data Set                                                                                                                                                                                                                 | _____ 2                  |
| Protocol version           | 3       | Date and version identifier                                                                                                                                                                                                                                                              | _____ n/a original       |
| Funding                    | 4       | Sources and types of financial, material, and other support                                                                                                                                                                                                                              | _____ 1                  |
| Roles and responsibilities | 5a      | Names, affiliations, and roles of protocol contributors                                                                                                                                                                                                                                  | _____ 1                  |
|                            | 5b      | Name and contact information for the trial sponsor                                                                                                                                                                                                                                       | _____ 1-2                |
|                            | 5c      | Role of study sponsor and funders, if any, in study design; collection, management, analysis, and interpretation of data; writing of the report; and the decision to submit the report for publication, including whether they will have ultimate authority over any of these activities | _____ n/a                |
|                            | 5d      | Composition, roles, and responsibilities of the coordinating centre, steering committee, endpoint adjudication committee, data management team, and other individuals or groups overseeing the trial, if applicable (see Item 21a for data monitoring committee)                         | _____ 16-17              |

|    |                                                    |     |                                                                                                                              |              |
|----|----------------------------------------------------|-----|------------------------------------------------------------------------------------------------------------------------------|--------------|
| 1  | Introduction                                       |     |                                                                                                                              |              |
| 2  |                                                    |     |                                                                                                                              |              |
| 3  | Background and                                     | 6a  | Description of research question and justification for undertaking the trial, including summary of relevant studies          | _____4-6     |
| 4  | rationale                                          |     | (published and unpublished) examining benefits and harms for each intervention                                               |              |
| 5  |                                                    |     |                                                                                                                              |              |
| 6  |                                                    | 6b  | Explanation for choice of comparators                                                                                        | _____6       |
| 7  |                                                    |     |                                                                                                                              |              |
| 8  | Objectives                                         | 7   | Specific objectives or hypotheses                                                                                            | _____7       |
| 9  |                                                    |     |                                                                                                                              |              |
| 10 | Trial design                                       | 8   | Description of trial design including type of trial (eg, parallel group, crossover, factorial, single group), allocation     |              |
| 11 |                                                    |     | ratio, and framework (eg, superiority, equivalence, noninferiority, exploratory)                                             | _____6       |
| 12 |                                                    |     |                                                                                                                              |              |
| 13 |                                                    |     |                                                                                                                              |              |
| 14 | Methods: Participants, interventions, and outcomes |     |                                                                                                                              |              |
| 15 |                                                    |     |                                                                                                                              |              |
| 16 | Study setting                                      | 9   | Description of study settings (eg, community clinic, academic hospital) and list of countries where data will be             | _____7-8     |
| 17 |                                                    |     | collected. Reference to where list of study sites can be obtained                                                            |              |
| 18 |                                                    |     |                                                                                                                              |              |
| 19 | Eligibility criteria                               | 10  | Inclusion and exclusion criteria for participants. If applicable, eligibility criteria for study centres and individuals who | _____7-8     |
| 20 |                                                    |     | will perform the interventions (eg, surgeons, psychotherapists)                                                              |              |
| 21 |                                                    |     |                                                                                                                              |              |
| 22 | Interventions                                      | 11a | Interventions for each group with sufficient detail to allow replication, including how and when they will be                | _____8-10    |
| 23 |                                                    |     | administered                                                                                                                 |              |
| 24 |                                                    |     |                                                                                                                              |              |
| 25 |                                                    | 11b | Criteria for discontinuing or modifying allocated interventions for a given trial participant (eg, drug dose change in       | _____10      |
| 26 |                                                    |     | response to harms, participant request, or improving/worsening disease)                                                      |              |
| 27 |                                                    |     |                                                                                                                              |              |
| 28 |                                                    | 11c | Strategies to improve adherence to intervention protocols, and any procedures for monitoring adherence (eg, drug             | _____8-9, 13 |
| 29 |                                                    |     | tablet return, laboratory tests)                                                                                             |              |
| 30 |                                                    |     |                                                                                                                              |              |
| 31 |                                                    | 11d | Relevant concomitant care and interventions that are permitted or prohibited during the trial                                | _____7-9     |
| 32 |                                                    |     |                                                                                                                              |              |
| 33 | Outcomes                                           | 12  | Primary, secondary, and other outcomes, including the specific measurement variable (eg, systolic blood pressure),           |              |
| 34 |                                                    |     | analysis metric (eg, change from baseline, final value, time to event), method of aggregation (eg, median, proportion),      | _____10-13   |
| 35 |                                                    |     | and time point for each outcome. Explanation of the clinical relevance of chosen efficacy and harm outcomes is               |              |
| 36 |                                                    |     | strongly recommended                                                                                                         |              |
| 37 |                                                    |     |                                                                                                                              |              |
| 38 |                                                    |     |                                                                                                                              |              |
| 39 |                                                    |     |                                                                                                                              |              |
| 40 | Participant timeline                               | 13  | Time schedule of enrolment, interventions (including any run-ins and washouts), assessments, and visits for                  | _____Fig. 3  |
| 41 |                                                    |     | participants. A schematic diagram is highly recommended (see Figure)                                                         |              |
| 42 |                                                    |     |                                                                                                                              |              |
| 43 |                                                    |     |                                                                                                                              |              |
| 44 |                                                    |     |                                                                                                                              |              |
| 45 |                                                    |     |                                                                                                                              |              |
| 46 |                                                    |     |                                                                                                                              |              |

1 Sample size 14 Estimated number of participants needed to achieve study objectives and how it was determined, including clinical and \_\_\_\_\_ 14  
2 statistical assumptions supporting any sample size calculations  
3  
4 Recruitment 15 Strategies for achieving adequate participant enrolment to reach target sample size \_\_\_\_\_ 17  
5  
6  
7 Methods: Assignment of interventions (for controlled trials)  
8  
9 Allocation:  
10 Sequence 16a Method of generating the allocation sequence (eg, computer-generated random numbers), and list of any factors for \_\_\_\_\_ 14  
11 generation stratification. To reduce predictability of a random sequence, details of any planned restriction (eg, blocking) should  
12 be provided in a separate document that is unavailable to those who enrol participants or assign interventions  
13  
14 Allocation 16b Mechanism of implementing the allocation sequence (eg, central telephone; sequentially numbered, opaque, sealed \_\_\_\_\_ 14  
15 concealment envelopes), describing any steps to conceal the sequence until interventions are assigned  
16 mechanism  
17  
18 Implementation 16c Who will generate the allocation sequence, who will enrol participants, and who will assign participants to \_\_\_\_\_ 14  
19 interventions  
20  
21 Blinding (masking) 17a Who will be blinded after assignment to interventions (eg, trial participants, care providers, outcome assessors, data \_\_\_\_\_ 14-15  
22 analysts), and how  
23  
24 17b If blinded, circumstances under which unblinding is permissible, and procedure for revealing a participant’s allocated \_\_\_\_\_ N/A  
25 intervention during the trial  
26  
27  
28  
29  
30 Methods: Data collection, management, and analysis  
31  
32 Data collection 18a Plans for assessment and collection of outcome, baseline, and other trial data, including any related processes to \_\_\_\_\_ 10-13  
33 methods promote data quality (eg, duplicate measurements, training of assessors) and a description of study instruments (eg,  
34 questionnaires, laboratory tests) along with their reliability and validity, if known. Reference to where data collection  
35 forms can be found, if not in the protocol  
36  
37 18b Plans to promote participant retention and complete follow-up, including list of any outcome data to be collected for \_\_\_\_\_ N/A  
38 participants who discontinue or deviate from intervention protocols  
39  
40  
41  
42  
43  
44  
45  
46

|    |                          |     |                                                                                                                                                                                                                                                                                                                                       |             |
|----|--------------------------|-----|---------------------------------------------------------------------------------------------------------------------------------------------------------------------------------------------------------------------------------------------------------------------------------------------------------------------------------------|-------------|
| 1  | Data management          | 19  | Plans for data entry, coding, security, and storage, including any related processes to promote data quality (eg, double data entry; range checks for data values). Reference to where details of data management procedures can be found, if not in the protocol                                                                     | _____16-18  |
| 2  |                          |     |                                                                                                                                                                                                                                                                                                                                       |             |
| 3  |                          |     |                                                                                                                                                                                                                                                                                                                                       |             |
| 4  |                          |     |                                                                                                                                                                                                                                                                                                                                       |             |
| 5  | Statistical methods      | 20a | Statistical methods for analysing primary and secondary outcomes. Reference to where other details of the statistical analysis plan can be found, if not in the protocol                                                                                                                                                              | _____15-16  |
| 6  |                          |     |                                                                                                                                                                                                                                                                                                                                       |             |
| 7  |                          |     |                                                                                                                                                                                                                                                                                                                                       |             |
| 8  |                          | 20b | Methods for any additional analyses (eg, subgroup and adjusted analyses)                                                                                                                                                                                                                                                              | _____15-16  |
| 9  |                          |     |                                                                                                                                                                                                                                                                                                                                       |             |
| 10 |                          | 20c | Definition of analysis population relating to protocol non-adherence (eg, as randomised analysis), and any statistical methods to handle missing data (eg, multiple imputation)                                                                                                                                                       | _____15-17  |
| 11 |                          |     |                                                                                                                                                                                                                                                                                                                                       |             |
| 12 |                          |     |                                                                                                                                                                                                                                                                                                                                       |             |
| 13 |                          |     |                                                                                                                                                                                                                                                                                                                                       |             |
| 14 | Methods: Monitoring      |     |                                                                                                                                                                                                                                                                                                                                       |             |
| 15 |                          |     |                                                                                                                                                                                                                                                                                                                                       |             |
| 16 | Data monitoring          | 21a | Composition of data monitoring committee (DMC); summary of its role and reporting structure; statement of whether it is independent from the sponsor and competing interests; and reference to where further details about its charter can be found, if not in the protocol. Alternatively, an explanation of why a DMC is not needed | _____17     |
| 17 |                          |     |                                                                                                                                                                                                                                                                                                                                       |             |
| 18 |                          |     |                                                                                                                                                                                                                                                                                                                                       |             |
| 19 |                          |     |                                                                                                                                                                                                                                                                                                                                       |             |
| 20 |                          |     |                                                                                                                                                                                                                                                                                                                                       |             |
| 21 |                          | 21b | Description of any interim analyses and stopping guidelines, including who will have access to these interim results and make the final decision to terminate the trial                                                                                                                                                               | _____N/A 17 |
| 22 |                          |     |                                                                                                                                                                                                                                                                                                                                       |             |
| 23 |                          |     |                                                                                                                                                                                                                                                                                                                                       |             |
| 24 | Harms                    | 22  | Plans for collecting, assessing, reporting, and managing solicited and spontaneously reported adverse events and other unintended effects of trial interventions or trial conduct                                                                                                                                                     | _____10, 17 |
| 25 |                          |     |                                                                                                                                                                                                                                                                                                                                       |             |
| 26 |                          |     |                                                                                                                                                                                                                                                                                                                                       |             |
| 27 | Auditing                 | 23  | Frequency and procedures for auditing trial conduct, if any, and whether the process will be independent from investigators and the sponsor                                                                                                                                                                                           | _____16-17  |
| 28 |                          |     |                                                                                                                                                                                                                                                                                                                                       |             |
| 29 |                          |     |                                                                                                                                                                                                                                                                                                                                       |             |
| 30 |                          |     |                                                                                                                                                                                                                                                                                                                                       |             |
| 31 | Ethics and dissemination |     |                                                                                                                                                                                                                                                                                                                                       |             |
| 32 |                          |     |                                                                                                                                                                                                                                                                                                                                       |             |
| 33 | Research ethics approval | 24  | Plans for seeking research ethics committee/institutional review board (REC/IRB) approval                                                                                                                                                                                                                                             | _____18     |
| 34 |                          |     |                                                                                                                                                                                                                                                                                                                                       |             |
| 35 |                          |     |                                                                                                                                                                                                                                                                                                                                       |             |
| 36 | Protocol amendments      | 25  | Plans for communicating important protocol modifications (eg, changes to eligibility criteria, outcomes, analyses) to relevant parties (eg, investigators, REC/IRBs, trial participants, trial registries, journals, regulators)                                                                                                      | _____16-18  |
| 37 |                          |     |                                                                                                                                                                                                                                                                                                                                       |             |
| 38 |                          |     |                                                                                                                                                                                                                                                                                                                                       |             |
| 39 | Consent or assent        | 26a | Who will obtain informed consent or assent from potential trial participants or authorised surrogates, and how (see Item 32)                                                                                                                                                                                                          | _____14     |
| 40 |                          |     |                                                                                                                                                                                                                                                                                                                                       |             |
| 41 |                          |     |                                                                                                                                                                                                                                                                                                                                       |             |
| 42 |                          |     |                                                                                                                                                                                                                                                                                                                                       |             |
| 43 |                          |     |                                                                                                                                                                                                                                                                                                                                       |             |
| 44 |                          |     |                                                                                                                                                                                                                                                                                                                                       |             |
| 45 |                          |     |                                                                                                                                                                                                                                                                                                                                       |             |
| 46 |                          |     |                                                                                                                                                                                                                                                                                                                                       |             |

|    |                               |     |                                                                                                                                                                                                                                                                                     |       |       |
|----|-------------------------------|-----|-------------------------------------------------------------------------------------------------------------------------------------------------------------------------------------------------------------------------------------------------------------------------------------|-------|-------|
| 1  |                               | 26b | Additional consent provisions for collection and use of participant data and biological specimens in ancillary studies, if applicable                                                                                                                                               | _____ | N/A   |
| 2  |                               |     |                                                                                                                                                                                                                                                                                     |       |       |
| 3  |                               |     |                                                                                                                                                                                                                                                                                     |       |       |
| 4  | Confidentiality               | 27  | How personal information about potential and enrolled participants will be collected, shared, and maintained in order to protect confidentiality before, during, and after the trial                                                                                                | _____ | 17-18 |
| 5  |                               |     |                                                                                                                                                                                                                                                                                     |       |       |
| 6  |                               |     |                                                                                                                                                                                                                                                                                     |       |       |
| 7  | Declaration of interests      | 28  | Financial and other competing interests for principal investigators for the overall trial and each study site                                                                                                                                                                       | _____ | 2     |
| 8  |                               |     |                                                                                                                                                                                                                                                                                     |       |       |
| 9  |                               |     |                                                                                                                                                                                                                                                                                     |       |       |
| 10 | Access to data                | 29  | Statement of who will have access to the final trial dataset, and disclosure of contractual agreements that limit such access for investigators                                                                                                                                     | _____ | 18-19 |
| 11 |                               |     |                                                                                                                                                                                                                                                                                     |       |       |
| 12 |                               |     |                                                                                                                                                                                                                                                                                     |       |       |
| 13 | Ancillary and post-trial care | 30  | Provisions, if any, for ancillary and post-trial care, and for compensation to those who suffer harm from trial participation                                                                                                                                                       | _____ | N/A   |
| 14 |                               |     |                                                                                                                                                                                                                                                                                     |       |       |
| 15 |                               |     |                                                                                                                                                                                                                                                                                     |       |       |
| 16 |                               |     |                                                                                                                                                                                                                                                                                     |       |       |
| 17 | Dissemination policy          | 31a | Plans for investigators and sponsor to communicate trial results to participants, healthcare professionals, the public, and other relevant groups (eg, via publication, reporting in results databases, or other data sharing arrangements), including any publication restrictions | _____ | 18-19 |
| 18 |                               |     |                                                                                                                                                                                                                                                                                     |       |       |
| 19 |                               |     |                                                                                                                                                                                                                                                                                     |       |       |
| 20 |                               |     |                                                                                                                                                                                                                                                                                     |       |       |
| 21 |                               | 31b | Authorship eligibility guidelines and any intended use of professional writers                                                                                                                                                                                                      | _____ | N/A   |
| 22 |                               |     |                                                                                                                                                                                                                                                                                     |       |       |
| 23 |                               | 31c | Plans, if any, for granting public access to the full protocol, participant-level dataset, and statistical code                                                                                                                                                                     | _____ | 19    |
| 24 |                               |     |                                                                                                                                                                                                                                                                                     |       |       |
| 25 |                               |     |                                                                                                                                                                                                                                                                                     |       |       |
| 26 | Appendices                    |     |                                                                                                                                                                                                                                                                                     |       |       |
| 27 |                               |     |                                                                                                                                                                                                                                                                                     |       |       |
| 28 | Informed consent materials    | 32  | Model consent form and other related documentation given to participants and authorised surrogates                                                                                                                                                                                  | _____ | N/A   |
| 29 |                               |     |                                                                                                                                                                                                                                                                                     |       |       |
| 30 |                               |     |                                                                                                                                                                                                                                                                                     |       |       |
| 31 | Biological specimens          | 33  | Plans for collection, laboratory evaluation, and storage of biological specimens for genetic or molecular analysis in the current trial and for future use in ancillary studies, if applicable                                                                                      | _____ | 19    |
| 32 |                               |     |                                                                                                                                                                                                                                                                                     |       |       |
| 33 |                               |     |                                                                                                                                                                                                                                                                                     |       |       |

\*It is strongly recommended that this checklist be read in conjunction with the SPIRIT 2013 Explanation & Elaboration for important clarification on the items. Amendments to the protocol should be tracked and dated. The SPIRIT checklist is copyrighted by the SPIRIT Group under the Creative Commons “Attribution-NonCommercial-NoDerivs 3.0 Unported” license.

# BMJ Open

## **HOMESIDE: Home-based family caregiver-delivered music and reading interventions for people living with dementia: Protocol of a randomised controlled trial.**

|                                 |                                                                                                                                                                                                                                                                                                                                                                                                                                                                                                                                                                                                                                                                                                                                                                                                                                                                                                                                                                                                                                                                                                                                                                                        |
|---------------------------------|----------------------------------------------------------------------------------------------------------------------------------------------------------------------------------------------------------------------------------------------------------------------------------------------------------------------------------------------------------------------------------------------------------------------------------------------------------------------------------------------------------------------------------------------------------------------------------------------------------------------------------------------------------------------------------------------------------------------------------------------------------------------------------------------------------------------------------------------------------------------------------------------------------------------------------------------------------------------------------------------------------------------------------------------------------------------------------------------------------------------------------------------------------------------------------------|
| Journal:                        | <i>BMJ Open</i>                                                                                                                                                                                                                                                                                                                                                                                                                                                                                                                                                                                                                                                                                                                                                                                                                                                                                                                                                                                                                                                                                                                                                                        |
| Manuscript ID                   | bmjopen-2019-031332.R2                                                                                                                                                                                                                                                                                                                                                                                                                                                                                                                                                                                                                                                                                                                                                                                                                                                                                                                                                                                                                                                                                                                                                                 |
| Article Type:                   | Protocol                                                                                                                                                                                                                                                                                                                                                                                                                                                                                                                                                                                                                                                                                                                                                                                                                                                                                                                                                                                                                                                                                                                                                                               |
| Date Submitted by the Author:   | 02-Aug-2019                                                                                                                                                                                                                                                                                                                                                                                                                                                                                                                                                                                                                                                                                                                                                                                                                                                                                                                                                                                                                                                                                                                                                                            |
| Complete List of Authors:       | Baker, Felicity; The University of Melbourne<br>Bloska, Jodie; Anglia Ruskin University, Music Therapy<br>Braat, Sabine ; University of Melbourne School of Population and Global Health, Centre for Epidemiology and Biostatistics<br>Bukowska, Anna; University of Physical Education<br>Clark, Imogen; Melbourne Conservatorium of Music<br>Hsu, Ming; Anglia Ruskin University<br>Kvamme, Tone; Norwegian Academy of Music, Music Therapy<br>Lautenschlager, Nicola; University of Melbourne, Academic Unit of Psychiatry of Old Age, Department of Psychiatry, Royal Melbourne Hospital, Royal Park Campus; Royal Melbourne Hospital Royal Park Campus, NorthWestern Mental Health, Melbourne Health<br>Lee, Young-Eun; Melbourne Conservatorium of Music<br>Smrokowska-Reichmann, Agnieszka; University of Physical Education<br>Sousa, Tanara; The University of Melbourne School of Population and Global Health<br>Stensaeth, Karette; Norwegian Academy of Music<br>Tamplin, Jeanette; Melbourne Conservatorium of Music<br>Wosch, Thomas; Hochschule fur angewandte Wissenschaften Wurzburg-Schweinfurt<br>Odell-Miller, Helen; Anglia Ruskin University - Cambridge Campus |
| <b>Primary Subject Heading</b>: | Geriatric medicine                                                                                                                                                                                                                                                                                                                                                                                                                                                                                                                                                                                                                                                                                                                                                                                                                                                                                                                                                                                                                                                                                                                                                                     |
| Secondary Subject Heading:      | Patient-centred medicine                                                                                                                                                                                                                                                                                                                                                                                                                                                                                                                                                                                                                                                                                                                                                                                                                                                                                                                                                                                                                                                                                                                                                               |
| Keywords:                       | music therapy, Dementia < NEUROLOGY, caregivers, home-based interventions, randomised controlled trial, behavioural and psychological symptoms of dementia                                                                                                                                                                                                                                                                                                                                                                                                                                                                                                                                                                                                                                                                                                                                                                                                                                                                                                                                                                                                                             |
|                                 |                                                                                                                                                                                                                                                                                                                                                                                                                                                                                                                                                                                                                                                                                                                                                                                                                                                                                                                                                                                                                                                                                                                                                                                        |

SCHOLARONE™  
Manuscripts



1  
2 Title: HOMESIDE: Home-based family caregiver-delivered music and reading interventions for  
3 people living with dementia: Protocol of a randomised controlled trial.  
4

5 Baker, F.A.<sup>1,2</sup>, Bloska, J.<sup>3</sup>, Braat, S.<sup>4</sup>, Bukowska, A.<sup>8</sup>, Clark, I.N.<sup>1</sup>, Hsu, M. H.<sup>3</sup>, Kvamme, T.<sup>2</sup>,  
6 Lautenschlager, N.T.<sup>5,6</sup>, Lee, Y-E.C.<sup>1</sup>, Smrokowska-Reichmann, A.<sup>8</sup>, Sousa, T.<sup>4</sup>, Stensæth, K.<sup>2</sup>,  
7 Tamplin, J.<sup>1</sup>, Wosch, T.<sup>7</sup>, Odell-Miller, H.<sup>3</sup>  
8

9 <sup>1</sup> Creative Arts and Music Therapy Research Unit, The University of Melbourne, Australia

10 <sup>2</sup> Centre for Music and Health, Norwegian Academy of Music, Norway

11 <sup>3</sup> Cambridge Institute for Music Therapy Research, Anglia Ruskin University, UK

12 <sup>4</sup> School of Population and Global Health, University of Melbourne, Australia

13 <sup>5</sup> Department of Psychiatry, Royal Melbourne Hospital, University of Melbourne, Australia

14 <sup>6</sup> Royal Melbourne Hospital Royal Park Campus, NorthWestern Mental Health, Melbourne Health  
15 Parkville, VIC, Australia

16 <sup>7</sup> Faculty of Applied Social Sciences, Music Therapy Lab, University of applied Sciences Würzburg-  
17 Schweinfurt, Germany

18 <sup>8</sup> Department of Occupational Therapy, University of Physical Education in Krakow, Poland

19  
20  
21  
22  
23  
24  
25  
26  
27  
28  
29  
30  
31  
32  
33  
34 Corresponding Author: Felicity Anne Baker, 234 St Kilda Rd, The University of Melbourne,  
35 Southbank, Melbourne, AUSTRALIA 3006, [felicity.baker@unimelb.edu.au](mailto:felicity.baker@unimelb.edu.au), Ph: +61 3 9035 3057,  
36  
37  
38 fax: +61 3 8344 5346  
39  
40  
41  
42  
43

44 Author Contributions: FB took the initiative for the study; FB, HOM, TW, KS, AB, JB developed  
45 the concept and design; SB developed the statistical analysis plan and TS designed the health  
46 economics plan. IC, MH, TK, NL, YL, ASR, JT helped to revise the concept and design. FB  
47 drafted the manuscript; all authors revised the manuscript for important intellectual content. All  
48 authors approved the final version of the manuscript.  
49  
50  
51  
52  
53  
54  
55  
56

57 **Funding:** This work was supported by the Joint Programs for Neurodegenerative Diseases (JPND)  
58 which includes joint funding from the National Health and Medical Research Council  
59 (APP1169867), Norwegian Research Council (Project number 298995), Federal Ministry of  
60 Education and Research Germany (01ED1901), and The National Centre for Research and

1  
2 Development, Poland JPND/04/2019 - The National Centre for Research and Development, and  
3 Alzheimer's Society, UK (grant no. 462).  
4

5 **Completing Interests:** None declared  
6

7 **Trial Registration Numbers:** ACTRN12618001799246p; Clinical Trials.gov NCT03907748  
8

9 **Ethics Approvals Obtained:** Australia Human Ethics Sub-Committee approval no. 1852845, the  
10 United Kingdom approval no. 19/EE/0177, Poland approval no. 186/KBL/OIL/2019, German  
11 approval no. DGP 19-013, and Norwegian Centre for Research Data (Ref 502736) and Norwegian  
12 REK Medical and Research Ethics (Ref 2019/941)  
13  
14  
15  
16

17 **Word count: 5293** (excluding title page, abstract, references, figures)  
18  
19  
20  
21

## 22 **Abstract:**

23  
24  
25  
26 *Introduction:* Pharmacological interventions to address behavioural and psychological symptoms of  
27 dementia (BPSD) can have undesirable side effects, therefore non-pharmacological approaches to managing  
28 symptoms may be preferable. Past studies show that music therapy can reduce BPSD, and other studies have  
29 explored how formal caregivers use music in their caring roles. However, no randomised study has examined  
30 the effects on BPSD of music interventions delivered by informal caregivers (CGs) in the home setting. Our  
31 project aims to address the need for improved informal care by training cohabiting family CGs to implement  
32 music interventions that target BPSD, and the quality of life (QoL) and wellbeing of people with dementia  
33 (PwD) and of CGs.  
34  
35  
36  
37  
38  
39  
40  
41  
42

43 *Methods and analysis:* A large international 3-arm parallel-group randomised controlled trial will recruit a  
44 sample of 495 dyads from Australia, Germany, UK, Poland and Norway. Dyads will be randomised equally to  
45 standard care (SC), a home-based music program plus SC, or a home-based reading program plus SC for 12  
46 weeks. The primary outcome is BPSD of PwD (measured using the Neuropsychiatric Inventory-  
47 Questionnaire). Secondary outcomes will examine relationship quality between CG and PwD, depression,  
48 resilience, competence, QoL for CG, and QoL in PwD. Outcomes will be collected at baseline, at the end of the  
49 12-week intervention and at 6-months post randomisation. Resource Utilization in Dementia will be used to  
50 collect economic data across the life of the intervention and at 6-month follow-up. We hypothesize that the  
51  
52  
53  
54  
55  
56  
57  
58  
59  
60

1  
2 music program plus SC will generate better results than SC alone (primary comparison) and the reading  
3  
4 program plus SC (secondary comparison).  
5

6 *Ethics and dissemination:* Ethical approval will be obtained for all countries. Results will be presented at  
7  
8 national and international conferences and published in scientific journals and disseminated to consumer and  
9  
10 caregiver representatives and the community.  
11  
12  
13  
14  
15

### 16 **Strengths and Limitations of this study**

17  
18  
19

- 20 • As a multinational trial, this study will provide internationally generalisable results concerning the  
21 effects of music intervention delivered by trained family caregivers on the behavioural and  
22 psychological symptoms of people living with dementia.  
23  
24
- 25 • Based on pilot data, this trial will have adequate power to determine the effects on the person with  
26 dementia.  
27  
28
- 29 • The trial will determine whether caregiver-delivered music interventions improve quality of life and  
30 wellbeing of the caregiver, and reduce healthcare costs for the caregiver and society.  
31  
32
- 33 • A comprehensive set of core outcomes will be measured, including long-term effects in key  
34 variables, with assessor blinding.  
35  
36
- 37 • As participants cannot be blinded, a limitation of the study is that they may provide biased responses  
38 on their self-report measures.  
39  
40  
41  
42  
43  
44  
45  
46  
47  
48  
49  
50  
51  
52  
53  
54  
55  
56  
57  
58  
59  
60

## BACKGROUND

Family caregivers (CG) play a vital role in providing care for a person living with dementia (PwD) in the home-setting [1]. This personalised care not only directly benefits the PwD by keeping them at home in a familiar environment but represents a significant economic contribution to society. CGs often find caregiving satisfying and rewarding, however the task of managing the challenging behavioural and psychological symptoms of dementia (BPSD) can override their capacity to cope, leading to negative physical and mental health including fatigue, depression, burnout, and illness,[2-3]. A deterioration in CG wellbeing may have a negative flow-on effect on the wellbeing of the PwD. A negative spiral may develop until the CG can no longer sustain the caring role, and the PwD moves into residential care earlier than desired.

The 2015 global cost of dementia was estimated to be US\$818 billion, and this figure will continue to increase as the number of people with dementia rises,[1]. Nearly 85% of costs are related to family and social, rather than medical care. With this increase and the escalating costs of care, it is time-critical that CG-directed home-based interventions are developed and tested. The 2017 Lancet Commission on Dementia,[1] suggests that pharmacological treatment of BPSD should be restricted to those with very severe symptoms and highlights music therapy as a non-pharmacological intervention that reduces BPSD (p.30).

Systematic reviews indicate that the majority of CG-directed interventions adopted cognitive-behavioural or psychoeducational approaches to address CG coping, depression and BPSD management,[4-5]. Adherence to programs was poor because CGs could not commit to the regular program attendance requirements,[4-5]. Drawing on social exchange theory, apathy and other BPSD lead to diminished reciprocity between CG and PwD, creating imbalances in the relationship,[6]. Therefore, the convenience of a home-based CG-delivered program that can manage BPSD and address relationship reciprocity is more likely to be adhered to, and more effective in promoting both PwD and CG wellbeing.

Music therapy is a registered psychosocial National Health Service (NHS in the UK) intervention that meets the current recommendations for addressing the individual needs of those with dementia,[7]. HOMESIDE (HOME-based caregiver-delivered music intervention for people living with dementia) uses a purposefully developed music intervention (MI) (described later) informed by previous meta-analyses that demonstrate

1 the effectiveness of music therapy in reducing BPSD,[8-11]. The MI is a translation of the research evidence  
2  
3  
4 to a home-care context and, instead of being delivered directly by qualified music therapists, they will train  
5  
6 CGs to deliver the MI. The MI incorporates Kitwood's model of personhood for PwD,[12], which is  
7  
8 essential to effective dementia care and underpins the philosophy of the 2018 Alzheimer's Association  
9  
10 Dementia Care Practice Recommendations. The person-centred dementia care embedded in the MI  
11  
12 emphasizes communication and relationships, recognising that dementia is best understood as an interplay  
13  
14 between neurological impairment and psychosocial factors (e.g. health, individual psychology) and the  
15  
16 environment,[13].  
17

18  
19  
20  
21 Small scale studies that have tested the effectiveness of MI training programs for informal and formal CGs  
22  
23 have had positive findings to date. Results of a cluster RCT with formal CGs showed the MI to be a  
24  
25 practicable and acceptable intervention, with PwD showing treatment-related improvements, and staff  
26  
27 reporting enhanced skills in caregiving,[8]. Although based on a small sample (N=17), large effects in BPSD  
28  
29 (Cohen's  $d=2.32$ ) were found between standard care (SC) and MI from baseline to 7-months. A home-based  
30  
31 feasibility RCT determined acceptability of the MI, assessed burden associated with delivering the MI, and  
32  
33 tested appropriateness of the measures,[14]. BPSD scores decreased from baseline to post-test in the MI  
34  
35 group but increased in the SC group and mixed results were shown for the comparative reading group. A  
36  
37 study involving eight family CGs who were trained to deliver home-based music programs for their care  
38  
39 recipient with dementia, found that both CGs and PwD improved in self-reported relaxation, comfort, and  
40  
41 happiness from baseline to post-test. Music activities taught to CGs comprised music listening with  
42  
43 reminiscence, movement to music, music and progressive muscle relaxation, drawing and discussing  
44  
45 drawing to music, singing, percussion instrument playing, and strategic use of music for use while  
46  
47 performing activities of daily living. CGs seemed to derive the most benefit from the program in comparison  
48  
49 with care recipients. Findings suggested that CGs enjoyed partaking in the reminiscing and shared musical  
50  
51 activities with their loved ones,[15].  
52  
53

54  
55  
56 The conceptual framework underpinning the MI incorporates the responses of the PwD, the ensuing moment  
57  
58 to moment interaction between the PwD and the CG, and the CGs' responses to the PwD and moments of  
59  
60 interaction (Figure 1). The MI is grounded in the established knowledge that music-induced emotions and

1 memories are often retained in PwD because of the relative preservation of medial frontal and limbic areas,[9,  
2  
3 16]. MIs are effective when the music selected for use is chosen by the PwD (or CG),[9, 11]. When music  
4  
5 facilitates moment to moment interactions, emotional and social engagement, and autobiographical recall,  
6  
7 imbalances in reciprocity are diminished. CGs' positive experience of seeing "the person behind the  
8  
9 dementia" via this music-induced response evokes CG experiences of pleasure, feelings of competence in the  
10  
11 CG, and fosters their resilience and coping. Ultimately the enhanced wellbeing of CGs will lead to more  
12  
13 effective care and better wellbeing outcomes for both CGs and PwD (Figure 1).  
14  
15  
16  
17  
18  
19  
20

<<INSERT FIGURE 1 ABOUT HERE

**Figure 1. Mechanisms of action underpinning the music intervention>>**

21  
22  
23  
24  
25 The comparative conditions in this trial are SC only (control) and a reading intervention plus SC (RI, active  
26  
27 control). The RI was included because studies have shown preliminary evidence that reading to and with PwD  
28  
29 can have positive impacts on BPSD,[17-18]. We anticipate MI to be superior to SC only. In addition, we  
30  
31 postulate that the RI will lead to a small positive effect but that MI is expected to be superior as music has  
32  
33 been shown to be a social connector and a trigger of autobiographical recall, is non-reliant on intact verbal  
34  
35 comprehension or expression, and can be used to regulate emotion and behaviour,[7, 9-11, 16, 19-22].  
36  
37  
38  
39

**Trial Design**

40  
41  
42 A large, pragmatic, single-blinded, international 3-arm parallel-group RCT design is planned with a 1:1:1  
43  
44 allocation ratio. Cohabiting dyads where one member of each dyad has a diagnosis of dementia will be  
45  
46 randomised to one of three conditions: 1) MI plus SC; 2) RI plus SC; and 3) SC only (Figure 2). CGs in MI  
47  
48 and RI groups will receive a 2-hour training session on how to deliver the MI or RI and will then engage the  
49  
50 PwD in a 5x weekly CG-directed home-program for 12 weeks. Two additional training sessions will be  
51  
52 provided at 3-weeks and 6-weeks post allocation. Fifteen-minute fortnightly phone calls will be scheduled to  
53  
54 support the CG, and encourage adherence to the protocol. Data will be collected at baseline, at the end of the  
55  
56 12-week intervention, and at 3-month follow-up (6-months post-randomisation). The SC group will not  
57  
58 receive any training sessions. This trial is framed as a superiority trial where we hypothesise that the MI will  
59  
60

1  
2 be superior to SC (primary) and RI plus SC (secondary) regarding BPSD of PwD at 12-weeks post-  
3  
4 randomisation.  
5  
6  
7

8 <<INSERT FIGURE 2 ABOUT HERE  
9

10 **Figure 2. HOMESIDE illustration of study design >>**  
11

## 12 **Objectives**

13  
14 The aim is to demonstrate the effectiveness of the 12-week HOMESIDE MI plus SC on the short-term BPSD at  
15 the end of intervention of PwD living at home and being cared for by a cohabiting CG compared to SC  
16 (primary), and to evaluate the effectiveness of MI plus SC compared to RI plus SC (secondary). Other  
17 secondary objectives are as follows:  
18  
19  
20  
21

- 22  
23 • Evaluate the maintenance of the effect of the MI plus SC on longer-term (6 months post-  
24 randomisation) BPSD compared to SC and RI plus SC.
- 25  
26 • Evaluate the effectiveness of the MI plus SC on short- and long-term levels of depression and quality  
27 of life of PwD compared to SC and RI plus SC.
- 28  
29 • Evaluate the effectiveness of the MI plus SC on short- and long-term levels of depression, resilience,  
30 sense of competence, and quality of life of the CG compared to SC and RI plus SC.
- 31  
32 • Evaluate the effectiveness of the MI plus SC on the short- and long-term perceived quality of the  
33 relationship between PwD and CG compared to SC and RI plus SC.
- 34  
35 • Compare the cost-effectiveness of a CG-delivered MI plus SC on PwD and CG outcomes compared  
36 to SC and RI plus SC, using quality of life for both PwD and CG.  
37  
38  
39  
40  
41  
42  
43  
44  
45  
46  
47

## 48 **METHODS AND ANALYSIS**

### 49 **Participants**

50  
51 The trial will be conducted in people's homes located in metropolitan cities and adjoining rural areas, in  
52 Australia, Germany, Poland, Norway, and the United Kingdom.  
53  
54

55  
56 Inclusion criteria:

- 57  
58 • dyads (cohabiting) who are close in relationship and where one member has a diagnosis of dementia  
59 according to ICD-10 criteria (Alzheimer's Disease [AD], Frontotemporal Dementia, Vascular  
60

1  
2 Dementia [VD], Lewy Body Disease, or mixed dementia) as determined by a clinician experienced in  
3  
4 diagnosing dementia,[7]. Close in relationship refers to a CG who may be a sibling, spouse, adult child,  
5  
6 friend, niece or nephew or any person who has a close relationship to the PwD, that is, anyone who is  
7  
8 not a formal paid caregiver.  
9

- 10 • dyads where the PwD has a Neuropsychiatric Inventory-Questionnaire (NPI-Q) Score of  $\geq 6$  (from a  
11  
12 maximum score of 36) and MMSE scores  $\leq 24$  as research indicates that NPI-Q scores  $\geq 6$  occur in  
13  
14 PwD who have high Mini Mental State Examination Scores,[23]. NPI-Q will form part of the  
15  
16 screening process, with a trained assessor administering the NPI-Q in the dyad's home prior to  
17  
18 enrolment in the study.  
19

20  
21 Exclusion criteria:

- 22  
23 • dyads where either or both the CR or PwD have significant hearing impairments that are not resolved  
24  
25 through the use of a hearing aid device and limit their capacity to enjoy musical experiences. There will  
26  
27 be no further exclusions.  
28

## 31 **Interventions**

32  
33 *Music Intervention.* Dyads randomly allocated to the MI will receive a 2-hour home-based MI training session  
34  
35 that aims to engage the PwD during and following the MI. Using a carefully prepared and detailed intervention  
36  
37 manual, a qualified music therapist will instruct the CG on methods and strategies for using music to assist the  
38  
39 PwD to become calmer (if agitated) or more energised (if apathetic). CGs will be instructed on how to choose  
40  
41 music and engage the PwD in effective and respectful discussions with the aim of evoking autobiographical  
42  
43 memories and sharing meaningful experiences,[24]. Strategies to engage the PwD and create opportunities for  
44  
45 meaningful dialogue with the PwD will be provided, as well as training CGs to notice the PwD's positive and  
46  
47 negative responses to music. The activities to be taught comprise: a) singing familiar/preferred songs followed  
48  
49 by CG-facilitated discussions about the meaning of the songs for the dyad, the PwD, and significant others, and  
50  
51 any associated memories,[20, 25]; b) movement to music (e.g. upper body and arms imitating familiar dance  
52  
53 movements to music) to assist in regulating arousal,[11]; c) playing instruments (or using household items to  
54  
55 make rhythmic sounds) while listening to music; and d) listening to familiar/preferred relaxing or enlivening  
56  
57 music dependent upon BPSD present at the time to assist in regulating arousal,[20]. CGs are then instructed to  
58  
59 deliver the MI at least 5x per week for approximately 30 mins over a 12-week period. After each MI session,  
60



1 they will diarise their experiences, including documenting which activities were used, session time and  
2 duration, and any positive or negative responses during and after the session. Such data (number of times per  
3 week, average duration, activities adopted) will be used to monitor and improve adherence to the protocol. At  
4 3-weeks and 6-weeks post allocation, the MI trainer will return to the dyad's home for a second and third  
5 training session (Figure 2). These sessions aim to further extend CG knowledge and skills, troubleshoot any  
6 issues, and improve protocol adherence. Fortnightly phone conversations with CGs will be used to support the  
7 CG and remind them to complete the diaries (to mitigate risk and maximise participant engagement, retention,  
8 and protocol adherence).

9  
10  
11  
12  
13  
14  
15  
16  
17  
18  
19  
20  
21 *Reading Intervention (active control)*. Dyads randomly allocated to the RI group will receive a 2-hour RI  
22 instruction session which aims to engage the PwD during and following the RI. The reading activities will be  
23 taught by a qualified practitioner, following a carefully prepared and detailed intervention manual. These  
24 activities are based on RI methods commonly used with PwD including: a) CG reading aloud to PwD; b) PwD  
25 reading aloud (or reciting poems, prayers, prose, short stories, fairy tales, when unable to read) to CG; c)  
26 listening to audio books and d) discussion of the text and personal responses,[17-19]. Strategies to engage the  
27 PwD and create opportunities for meaningful dialogue with the PwD will be provided as well as guidance on  
28 selecting reading material accessible to the PwD's level of cognitive impairment. CGs are then instructed to  
29 deliver RI at least 5x per week for 30 mins over 12-weeks and diarise their reading activities to record activity  
30 and adherence. Diaries will serve as a mechanism to monitor adherence to the protocol. At 3-weeks and 6-  
31 weeks post allocation, as per the MI condition, the RI trainers will return to the dyad's home for a second  
32 and third training session with the intention of further extending CG knowledge and skills and to monitor and  
33 improve intervention protocol adherence. Fortnightly phone conversations with CGs will be used to support  
34 the CG and remind them to complete the diaries (to mitigate risk of noncompletion). Like the MI condition,  
35 phone calls also aim to maximise participant engagement, retention, and protocol adherence.

36  
37  
38  
39  
40  
41  
42  
43  
44  
45  
46  
47  
48  
49  
50  
51  
52  
53  
54 For both the MI and RI, at screening, the assessors will determine the music and reading resources already  
55 available to the dyads. Should they require resources (for example large print books, mp3 players/speakers,  
56 downloadable music), the research team will loan these resources for the dyads, free of charge.

1  
2 *Standard Care.* Dyads randomly allocated to this condition will not be trained in either MI or RI but will be  
3  
4 instructed to care for the PwD in their usual manner. This consists of receiving medical, therapeutic and  
5  
6 personal care, as well as participating in usual leisure activities.  
7  
8  
9

10 *Discontinuing or Modifying Interventions.* Where there is a significant deterioration in the health of the PwD  
11  
12 and/or the CG that leads to hospital admission or care home admission, the MI or RI will be discontinued. If  
13  
14 there is a change in primary CG partway through the study, the dyad will be withdrawn from the study.  
15  
16  
17

18 *Training and assessment of fidelity.* Given the MI and RI will be delivered in five different countries with  
19  
20 different healthcare philosophies and practices, a careful plan for fidelity of the study design, treatment  
21  
22 integrity, treatment differentiation, treatment receipt, and treatment enactment has been developed. A  
23  
24 standardised manual for MI and RI has been developed and agreed upon by all countries prior to  
25  
26 implementation. Fidelity in this study is complex as it will involve assessing fidelity of the MI and RI  
27  
28 training session, but also fidelity of the CG-directed program. Delivery of MI and RI training by research  
29  
30 staff will be videorecorded and a randomised selection of 20% of recordings from every site will be reviewed  
31  
32 by members of the research team and cross-checked with the MI and RI protocol manuals using a custom  
33  
34 fidelity checklist. Individualised supervision and monitoring of intervention trainers will be employed to  
35  
36 minimise “drift” in trainer differences and control for differences in trainer styles. CG diaries will be used to  
37  
38 determine whether the MI and RI protocols have been adhered to and the success of treatment enactment.  
39  
40  
41  
42  
43

## 44 **Outcomes**

45  
46 At baseline, demographic data (age, gender, and dyad history) of both CG and PwD will be collected as well  
47  
48 as diagnostic information of PwD (ICD-10).

49  
50  
51 Where possible, core outcomes ([www.comet-initiative.org](http://www.comet-initiative.org)) for psychosocial intervention research in  
52  
53 dementia care were selected,[26]. For the PwD, the following measures were selected:

- 54 • Behavioural and Psychological Symptoms of Dementia - The NPI-Q is the most highly regarded and  
55  
56 used measure for determining the severity of BPSD in clinical trials. The 12-item scale is used to assess  
57  
58 the behaviour of PwD across 12 domains of commonly displayed BPSD. The scale has been translated  
59  
60

1  
2 into more than 40 languages, has been cross-validated against the NPI as the gold standard ( $r=0.73$ ) and  
3  
4 has demonstrated good validity (sensitivity = 74.1%, specificity = 79.5%), internal reliability ( $\alpha= 0.783$ )  
5  
6 and excellent test-retest reliability ( $r = 0.99$ ),[27-28]. Total severity scores range from 0 to 36; higher  
7  
8 values are indicative of higher severity. Distress scores range from 0 to 60; higher values represent  
9  
10 higher levels of distress. CGs will self-complete the NPI-Q with guidance from the research assessor if  
11  
12 required.

- 13  
14  
15 • Depression – The Montgomery Asberg Depression Rating Scale,[29] (MADRS) will be used to assess  
16  
17 the severity of depression. The 10-item scale with each item's scores ranging from 0 (no symptoms) –6  
18  
19 (severe symptoms) is determined through an assessor-led interview with the proxy, in this study, the  
20  
21 CG. Total score ranges from 0 to 60 with higher scores indicating more severe depression. MADRS has  
22  
23 been found to have good constructive validity, internal reliability ( $\alpha= 0.84$ ), and test-retest reliability  
24  
25 (ICC=0.78). The scale has been widely used in clinical trials,[29].
- 26  
27 • Quality of Life (QoL) – The QoL of PwD will be determined by administering the Quality of Life-  
28  
29 Alzheimer's Disease (QoL-AD),[30] scale. The QoL-AD is recommended by the COS,[26] for use in  
30  
31 clinical trials. It is a simple 13-item self-report measure, which is rated on a 4-point scale, within the  
32  
33 structure of a verbally delivered interview. Total scores range from 13 (poor quality of life) to 52  
34  
35 (excellent quality of life in all areas). Studies indicate that the measure can demonstrate sensitivity to  
36  
37 psychosocial intervention, correlates with health-utility measures,[31], has excellent interrater reliability  
38  
39 ( $\kappa > 0.70$ ) and internal consistency ( $\alpha = 0.82$ ). The QoL-AD is reliable when used with people with  
40  
41 MMSE scores of  $\geq 10$ . Both a CG proxy and PwD self-report (if possible) will be collected at the 3-  
42  
43 timepoints. If the PwD is able to complete the MMSE at all time points, then their response will be  
44  
45 included in the analysis. If not, then the proxy version at all time points will be used.
- 46  
47 • Cognition - The Mini-Mental State Examination (MMSE) will be administered pre and post intervention  
48  
49 (Time 1 and Time 2) to monitor any change in the PwD's cognition and to examine the relationship  
50  
51 between cognitive decline, BPSD, depression and response to different conditions. The MMSE is a 30-  
52  
53 point questionnaire used to estimate the severity and progression of cognitive impairment and to follow  
54  
55 the course of cognitive changes in an individual over time,[32]. The MMSE tests for orientation,  
56  
57 attention, memory, language and visual-spatial skills. It is reliable and valid for both diagnosis and  
58  
59 longitudinal assessment. Higher scores indicate better cognitive capacity with scores of 24-30 indicating  
60

1  
2 no cognitive impairment; 19-23 indicating mild cognitive impairment; 10-18 indicating moderate  
3 cognitive impairment; and scores <10 indicating severe cognitive impairment. MMSE scores will be  
4 determined through assessor-led interviews with PwD participants.  
5  
6  
7  
8  
9

10  
11 For the CG, the following measures were selected:

- 12  
13 • Symptoms of depression – CG depression will be measured using the Patient Health Questionnaire–9  
14 (PHQ-9),[33]. This self-completed 9-item questionnaire asks the participant about how often they  
15 experience the descriptors over the last 2 weeks. Each item is scored from 0 (not at all) to 3 (nearly  
16 every day). Total scores range from 0 to 27. The PHQ–9 has comparable sensitivity and specificity to  
17 other depression measures; high internal reliability ( $\alpha = 0.89$ ), and test-retest reliability ( $r = 0.84$ ).  
18  
19
- 20 • Resilience – CG resilience will be measured using the self-completed 14-item Resilience Scale (RS-  
21 14),[34]. Total scores range from 14 to 98, with higher scores indicative of higher resilience. The  
22 measure has been tested and has good concurrent validity, good internal reliability ( $\alpha = 0.8 - 0.90$ ), good  
23 construct validity, test-retest reliability ( $r = 0.67$  to  $0.84$ ) and has been translated into 36 languages,[35].  
24  
25
- 26 • Competence - CG competence will be measured using the self-completed Short Sense of Competence  
27 Questionnaire (SSCQ),[36]. The 7-items cover 3 main domains; self-reported feelings about how the  
28 caregiver role impacts the CG's personal life, satisfaction with their performance as a CG, and their  
29 satisfaction with how the PwD responds to the CG. Total scores ranged from 7 to 35 with higher scores  
30 indicative of a stronger sense of competence. The measure has been cross-validated with the longer 35-  
31 item standard Sense of Competence Questionnaire ( $r = 0.88$ ) and has been shown to have high  
32 reliability (Cronbach's  $\alpha = 0.76$ ).  
33  
34
- 35 • CG Quality of Life – QoL of the CG will be assessed using the self-completed Assessment of Quality of  
36 Life-6D instrument (AQoL-6D),[37] Each item asks participants to describe their situation over the past  
37 week by ticking the box (from 4 to 6 choices) that best reflects their situation. The psychometric  
38 property testing found the instrument to be reliable and valid, and has greater sensitivity to the  
39 psychosocial dimensions of QoL than other utility instruments,[37-38].  
40  
41
- 42 • Relationship quality – CG perception quality of the CG and PwD relationship will be captured by  
43 asking the CG to self-complete the Quality of Caregiver-Patient Relationship (QCPR),[39]. This 14-  
44  
45  
46  
47  
48  
49  
50  
51  
52  
53  
54  
55  
56  
57  
58  
59  
60

1  
2 item measure aims to capture the strength of the quality of relationship between the PwD and CG, from  
3 the CG's perspective. Total scores range from 14 to 70, with higher scores indicating a higher quality  
4 relationship. The measure has demonstrated acceptable internal consistency ( $\alpha = 0.82$ ) and concurrent  
5 validity.  
6  
7  
8  
9

- 10 • Adherence to the MI/RI intervention will be measured through CG completed diaries. CGs are deemed  
11 adherent to the protocol if they have provided >2 sessions of MI or RI per week, for at least 30minutes  
12 in total. Data on the general use of reading and music by all dyads (including SC) will be collected at  
13 post-test. For each diary entry, CGs will be asked to record the date, start and stop time of MI/RI  
14 engagement, types of activities used, their experiences during the session (negative, neutral, positive,  
15 unsure), effects from the intervention for the remainder of the day until the PwD goes to bed for the  
16 evening sleep (negative, neutral, positive, unsure), and any comments. This data will be used in  
17 qualitative analyses to gain more nuanced understandings of how the activities are perceived and how  
18 these may change over the course of the intervention period.  
19  
20  
21  
22  
23  
24  
25  
26  
27  
28  
29  
30

31 To evaluate the cost-effectiveness of MI compared to RI and SC on PwD and CG, the outcomes will be  
32 measured using:  
33

- 34 • Quality Adjusted Life-Years – The EuroQol instrument (EQ-5D-5L),[40] is a generic quality of life  
35 measure that is internationally used to determine the quality-adjusted life-years (QALYs) and used for  
36 clinical and economic appraisal,[40]. The measure is not cognitively demanding and quick to complete.  
37 Scores from the five items are not combined arithmetically but using preference weights which arrive at  
38 an overall quality of life score. These range from lower than 0 (worse than death) to 1 (best possible).  
39 CGs will complete the measure as a proxy for the PwD and self-report their own health status,[26, 41-44].  
40  
41  
42  
43  
44  
45  
46  
47
- 48 • Resource Utilization in Dementia (RUD) - The RUD is a standardized instrument for resource use data  
49 collection in dementia, designed to collect data from formal and informal care across different countries. The  
50 RUD assesses resource use of both PwD and CG, including time expended in different daily tasks, and  
51 consists of baseline and a follow-up assessment,[45]. The RUD will be completed through assessor-led  
52 interviews with CGs.  
53  
54  
55  
56  
57  
58  
59  
60

CGs will be provided with a set of guidelines as to how to complete the diary and all self-report and proxy measures. The schedule for enrolment, baseline assessments, all outcome measures, and intervention trainings is outlined in Figure 3.

<<INSERT FIGURE 3 ABOUT HERE

**Figure 3. Schedule of enrolment, interventions, and assessments >>**

### **Sample size**

A total of 165 dyads in each arm of the study, or 495 in total, are needed to detect a difference of 3-points in NPI-Q total severity score (primary outcome) between the MI plus SC and SC arm (primary comparison) at 12-weeks (primary time point). This assumes 90% power, a two-tailed significance level of 5%, equal standard deviation (SD, 7.5 points) in the groups, no correlation between baseline and 12 weeks (conservative), and 20% attrition. A 3-point change from baseline in NPI-Q total severity score is considered a clinically meaningful difference,[46]. A conservative SD of 7.5 points is based on that observed in 1026 community-living participants across eight European countries with mild to severe dementia (SD 5.9 to 6.5 points),[47-48]. A conservative drop-out proportion (e.g. withdrawn by CG, physician, or death) of 20% is based on a reported 5.6% (95% CI [1.8%, 12.6%]) drop-out at 3 months in 89 in-patients with mild to moderate dementia in Finland participating in a three-arm RCT of singing, music, or usual care,[25].

### **Recruitment**

Randomisation will aim to be distributed equally across five countries (Australia, United Kingdom, Norway, Germany, and Poland) to support between-country analyses. Participants will be recruited through established partner organisations. Staff from the partner organisations will introduce the trial to potential participants and invite them to participate in the study. They will be given an information sheet explaining the main aspects of the trial and provided with contact details of the research team who will be available to answer further questions.

### **Randomisation, Allocation Concealment, and Blinding**

1  
2 The randomisation schedule will be computer-generated by an independent statistician and allocation will be  
3 carried out through a centralised randomisation service. Block permuted randomisation with stratification by  
4 participating site will be used, so that treatment balance within site is achieved. Dyads who meet the inclusion  
5 criteria and none of the exclusion criteria will be randomised 1:1:1 into MI, RI, or SC. Randomisation will  
6 occur after the eligibility checking, informed consent, and baseline assessment have been completed. Informed  
7 consent/assent will be obtained by a blinded assessor prior to the baseline assessment. The study coordinator in  
8 each country will be informed of the allocation and will inform dyads of their group allocation by post,  
9 phone, or email.

10 Participant dyads cannot be fully blinded due to the active nature of the interventions however, we will avoid  
11 publicizing our hypotheses that MI may be superior to SC only and RI. Plain language statements and  
12 consent forms will use neutral wording to maintain equipoise and to avoid expectancy effects. Blinded  
13 assessors will collect participants' data at baseline, post-intervention, and follow-up. Diaries will be returned  
14 in sealed envelopes to minimise risk of assessors becoming unblinded. The success of assessor blinding will  
15 be checked by asking the assessor to guess the treatment assignment (or say "I do not know") after the post-  
16 intervention and follow-up periods. This treatment guess will then be compared against the actual treatment  
17 and the blinding index derived. The independent statistician will not reveal the allocation codes to any of the  
18 study team except for the study coordinators of each country in charge of group allocation. All other  
19 investigators and the study statistician will remain blinded until the database has been cleaned, a blinded data  
20 review has taken place, and the database is ready for analysis.

## 21 22 23 24 25 26 27 28 29 30 31 32 33 34 35 36 37 38 39 40 41 42 43 44 **Analysis**

45 Analyses will be performed on an intention-to-treat basis including all randomised dyads in their allocated  
46 study arm. The primary outcome (NPI-Q severity total score) will be analysed using a constrained longitudinal  
47 data analysis (cLDA) model,[49] with response consisting of all scores (baseline, 12 weeks and 6-months) and  
48 the model including factors representing intervention, time, intervention by time interaction, and site with the  
49 restriction of a common baseline mean score across interventions. This refers to the assumption that at baseline  
50 there are no differences between the interventions in the mean score, thus assuming the randomisation was  
51 effective. This assumption will be enforced statistically in the statistical model. The absolute difference  
52 between MI and SC and MI and RI in mean change from baseline will be estimated (including two-sided 95%

confidence interval) at 12 weeks (primary time point). A hierarchical fixed sequence testing procedure will allow testing of MI versus RI at 12 weeks at 5% if the comparison of MI versus SC at 12 weeks has a p-value < 0.05. Secondary analyses will consist of a model adjusted for potential confounders (types of dementia and gender). The cLDA model provides valid inference if the missing data mechanism is at most missing at random. In addition to the intention-to-treat effect we will obtain the complier average causal effect by making use of the collected adherence data,[50]. Analyses similar to the primary outcome will be applied to the secondary outcomes for PwD and CGs. Heterogeneity of the intervention effect across subgroups (gender of the PwD/CG, types of dementia, severity of dementia, time of onset dementia, length of time having dementia, relationship between PwD and CG, country) will be assessed by means of interaction tests. The number and percentage of PwDs and CGs with adverse events will be summarized by intervention group.

Cost-effectiveness analysis in a societal perspective will be performed separately for each country using the utilities generated by EQ-5D-5L for both PwD and CG and country-specific weights, to estimate a combined QALY score using a generalized linear model adjusted by the baseline. Health and informal care resources consumed by PwD will be assessed using the RUD and unit cost by country. A generalized linear mixed model will be used to estimate the main predictors of the total costs in the MI, RI and SC groups. Incremental cost-effectiveness ratio will be calculated using the cost and effect estimates comparing MI with RI and SC. The uncertainty around the incremental cost-effectiveness ratio will be estimated using bootstrapping (1000 replications) adjusting to control variables.

### **Patient and public involvement**

All countries have involved user and advocacy organisations in the development and design of the study. The UK, Australia, and Germany have been piloting work with formal and informal CGs of PwD for many years. CGs and PwD have been involved designing the diaries which capture adherence data. It was imperative that the diary be user-friendly, not burdensome on the CG, and yet enabled them to document both the positive and negative aspects of the session. Several iterations of the diary were constructed prior to arriving at the final structure. Pilot work in Australia,[14] involved interviews post-intervention to identify strengths, limitations, challenges, and experiences in delivering the MI, as well as recommendations for suggested



1  
2 modifications to the intervention training. Representatives of advocacy groups and end users from all  
3  
4 countries will be represented on an international Participant and Public Involvement Committee.  
5  
6  
7

## 8 **Monitoring and Oversight**

9

10 A Trial Operations Committee (TOC) will comprise the principal investigator, chief investigators and  
11 clinical trial managers from each of the 5 countries, the study statistician, health economist, and a consumer  
12 representative. The TOC will meet at least 6-weekly, and will oversee all aspects of the trial delivery  
13 including strategies to support efficient and effective recruitment and retention, reviewing completeness of  
14 datasets, monitoring intervention fidelity, management of timelines and milestones, review of country-by-  
15 country progress, public and patient involvement or actions, and publication and dissemination plans. The  
16 role of the members of the TOC is to bring country-specific issues to the international team for discussion to  
17 ensure the study is being monitored and delivered according to the agreed protocols. Protocol deviations and  
18 any changes or amendments to the operational processes of the trial will be discussed and decisions made by  
19 the TOC.  
20  
21  
22  
23  
24  
25  
26  
27  
28  
29  
30  
31  
32

33 A Trial Steering Committee (TSC) will comprise of members independent of the clinical trial as well as  
34 members and representing consumers and other relevant advocacy organisations. The trial Principal  
35 Investigator (or a proxy in her absence) will also sit on the committee as a non-voting member. The  
36 Committee will meet biannually (or more often when needed) to review and monitor all aspects of the study  
37 delivery. They will draw on reports provided to them by the TOC and make recommendations to the PI and  
38 TOC about whether further actions are required.  
39  
40  
41  
42  
43  
44  
45

46 A DSMC will review the cumulative study data to evaluate the recruitment, safety, study conduct, and  
47 scientific validity and integrity of the trial. The committee consists of at least five people with strong  
48 methodological, biostatistical, and clinical expertise who are independent of the project and an end user  
49 representative. The DSMC will be provided with data on recruitment, intervention uptake, any unforeseen  
50 and/or adverse events, and review serious adverse events. The meetings will consist of an open and a closed  
51 part. In the open part, the general progress of the trial will be discussed with the principal investigator. In the  
52 closed part, the DSMC will discuss any safety concerns and if considered required, the DSMC will make  
53 recommendations to the TOC for appropriate action.  
54  
55  
56  
57  
58  
59  
60

1  
2  
3  
4 Study data will be collected and managed using REDCap® electronic data capture tools hosted at the  
5  
6 University of Melbourne,[51]. The Data Management Coordinating Center will oversee the intra-study data  
7  
8 sharing process between countries?, with input from the Data Management Subcommittee. We will develop  
9  
10 a data management manual detailing data collection protocols and provide comprehensive training of those  
11  
12 members of the research team who collect, check and enter study data. The Principal Investigator, study  
13  
14 statistician, and health economist from the University of Melbourne will be given access to the cleaned data  
15  
16 sets. Country specific lead investigators will only have access to their own country's cleaned data sets. All  
17  
18 data sets will be password-protected. To ensure confidentiality, data dispersed to project team members will  
19  
20 have any identifying information removed.  
21  
22  
23  
24

### 25 **Risk management**

26  
27 Processes have been put in place to mitigate risks. One of the most significant risks associated with the  
28  
29 project is slow recruitment. To offset the risk of slow recruitment, data is being collected across five  
30  
31 countries. If some countries have less difficulty than others in recruiting, then these countries will recruit  
32  
33 greater numbers to ensure the required sample size is obtained. Another risk identified is the heterogeneity of  
34  
35 intervention delivery. The inclusion of a detailed manual, regular supervision with interventionists, and  
36  
37 monitoring the effectiveness of interventionist training will mitigate the risk of poor intervention fidelity.  
38  
39  
40  
41  
42

### 43 **Ethics and Dissemination Plan**

44  
45 All research and clinical activities carried out for the HOMESIDE project will be in compliance with  
46  
47 fundamental ethical principles including those reflected in the Oviedo convention and the Convention for the  
48  
49 Protection of Human Rights and Fundamental Freedoms and legal requirements (Directive 95/46/EC on the  
50  
51 protection of individuals with regard to the processing of personal data and on the free movement of such  
52  
53 data; and Directives 2001/20/EC, 2005/28/EC relating to the implementation of good clinical practice in the  
54  
55 conduct of clinical trials). Ethical conduct will be managed in the following ways:

- 56  
57 • The clinical trial coordinator in each country will implement the research in full respect of European  
58  
59 /national/ institutional legal and ethical requirements and codes of practice.  
60

- Ethics approvals in each country must be obtained prior to commencement of the trial.
- Informed consent from the PwD's guardian must be obtained prior to enrolling a participant in the study. Assent from the PwD will always be sought prior to enrolment in the study.
- National and International rules on data protection will be followed. that the participating countries in HOMESIDE within the EU and EEA (UK, Germany, Poland and Norway) also relate to the General Data Protection Regulation (GDPR)(Regulation (EU) 2016/679), designed to harmonize data privacy laws across Europe, to protect and empower all EU citizens data privacy, and to reshape the way organizations across the region approach data privacy. The HOMESIDE partners have also signed a consortium agreement where they consent to follow national and international rules on collaboration, ethics and data protection.

The report on the main, pre-planned analyses of the primary endpoint and up until the 6-month follow-up will be submitted to a leading medical journal. Further publications may focus on issues such as recruitment and retention strategies for home-based programs. Publications based on qualitative interviews and video analyses will focus on barriers and facilitators for implementation and promotion of adherence to home-based programs; experiences of caregivers in delivering the programs; and the development of best practice training guidelines. In addition to publications in academic journals, a number of policy briefing papers for Government and aged care/dementia advocacy groups are planned as well as the development of training manuals and guidelines for dissemination.

### **Data Sharing**

In accordance with the Australian Code for Responsible Conduct of Research (Universities Australia, 2018), all data will be retained for retrieval and re-use in future research where participant permission is granted.

Following project completion, de-identified anonymised data (with participant consent) will be available on the Australian Data Archive <https://ada.edu.au> and listed on Research Australia's <https://researchaustralia.org> website to facilitate access for future research. Data made available will include individual-level deidentified participant data, reports on adverse events, and deidentified interview transcripts. According to the GDPR, the consortium have agreed to the reuse of data for 10 years post project completion.

## Relevance and Benefit to Society

As the majority of PwD live in the community and not in residential care settings, quality informal care for PwD is crucial for managing BPSD and enhancing quality of life. This protocol details the process for testing the effectiveness and cost-effectiveness of a CG-directed music intervention and reading intervention designed to manage the BPSD of PwD, the sense of burden and wellbeing of the CG, and provide meaningful possibilities to maintain the relationship between PwD and their CGs. We expect that with support and training, the MI will be easily implemented in the family home by CGs. With the increasing number of people living with dementia and the stress this will place on countries' economies, our project aims to test an intervention designed to keep people living at home with family CGs for as long as possible, reducing the burden for society and caregivers. Our study will be able to estimate the incremental cost-effectiveness ratio between MI and RI, MI and SC, and RI and SC. Data may support aged care policy recommendations and as the interventions will be delivered in five different countries, results will be broadly generalisable.

## Acknowledgements

Laura Blauth and Libby Flynn provided valuable comments on this protocol.

## References

1. Livingston G, Sommerlad A, Orgeta V, et al. Dementia prevention, intervention, and care. *Lancet*. 2017;390:2673-2734. doi:10.1016/S0140-6736(17)31363-6. [published Online First: 20 July 2017].
2. Papastavrou E, Kalokerinou A, Papacostas SS, et al. Caring for a relative with dementia: family caregiver burden. *J Adv Nurs*. 2007;58: 446-57.
3. O'Dwyer S, Moyle W, van Wyk S. Suicidal ideation and resilience in family carers of people with dementia: A pilot qualitative study. *Aging Ment Health*. 2013;17:753-760. doi:10.1080/13607863.2013.789001. [published Online First: 23 April 2013].
4. Li R, Cooper C, Austin A, et al. Do changes in coping style explain the effectiveness of interventions for psychological morbidity in family carers of people with dementia? A systematic review and

- 1 meta-analysis. *Int Psychogeriatr*. 2013;25:204-214. doi:10.1017/S1041610212001755. [published  
2 Online First: 22 October 2012].  
3  
4  
5  
6 5. Piersol CV, Canton K, Connor SE, et al. Effectiveness of interventions for caregivers of people with  
7 Alzheimer's disease and related major neurocognitive disorders: A systematic review. *Am J Occup  
8 Ther*, 2017;71(5): 7105180020p1-7105180020p10. doi: 10.5014/ajot.2017.027581.  
9  
10  
11  
12 6. deVugt, M. E. Stevens F, Aalten P, et al. Behavioural disturbances in dementia patients and quality  
13 of the marital relationship. *Inter. J. Geriatr Psychiatry* 2003;18:149–154.  
14  
15  
16 7. National Institute for Health and Care Excellence. NICE guidelines: Dementia: assessment,  
17 management and support for people living with dementia and their carers. Published: 20 June 2018.  
18 Available at: nice.org.uk/guidance/ng97.  
19  
20  
21  
22 8. Hsu MH, Flowerdew R, Parker M, et al. Individual music therapy for managing neuropsychiatric  
23 symptoms for people with dementia and their carers: a cluster randomized controlled feasibility  
24 study. *BMC Geriatr* 2015;15:84-015-0082-4. doi.org/10.1186/s12877-015-0082-4 [published Online  
25 First: 18 July 2015].  
26  
27  
28  
29 9. Fusar-Poli L, Bieleninik L, Brondino N, et al. The effect of music therapy on cognitive functions in  
30 patients with dementia: a systematic review and meta-analysis. *Ageing Ment Health* 2017;1–10.  
31 doi.org/10.1080/13607863.2017.1348474 [Published online: 10 Jul 2017].  
32  
33  
34  
35 10. Zhang Y, Cai J, An L, et al. Does music therapy enhance behavioral and cognitive function in  
36 elderly dementia patients? A systematic review and meta-analysis. *Ageing Res Rev* 2017;35:1–11.  
37 doi.org/10.1016/j.arr.2016.12.003 [published Online First: 23 December 2016].  
38  
39  
40  
41 11. Ridder HM, Stige B, Qvale LG, et al. Individual music therapy for agitation in dementia: an  
42 exploratory randomized controlled trial. *Ageing Ment Health* 2013;17(6):667-678.  
43 doi:10.1080/13607863.2013.790926. [published Online First: 27 April 2013].  
44  
45  
46  
47 12. Kitwood T. Dementia reconsidered: The person comes first. Buckingham, UK: Open University  
48 Press 1997.  
49  
50  
51  
52 13. Brooker D. Person-centred Dementia Care: Making Services Better. London: Jessica Kingsley  
53 Publishers 2007.  
54  
55  
56  
57  
58  
59  
60

14. Baker F, Grocke D, Pachana N. Connecting through music: A study of a spousal carerCG-directed music intervention designed to prolong fulfilling relationships in couples where one person has dementia. *Australian Journal of Music Therapy* 2012;23:4-19.
15. Hanser SB, Butterfield-Whitcomb J, Kawata M, Collins BE. Home-based music strategies with individuals who have dementia and their family caregivers. *Journal of Music Therapy* 2011 48:2–27.
16. Jacobsen JH, Stelzer J, Fritz TH, et al. Why musical memory can be preserved in advanced Alzheimer's disease. *Brain* 2015;138:2438-2450. doi:10.1093/brain/awv135. [published Online First: 3 June 2015].
17. Longden E, Davis PM, Carroll J, et al. An evaluation of shared reading groups for adults living with dementia: preliminary findings. *J Public Ment Health* 2016;15(2):75-82. doi:10.1108/JPMH-06-2015-0023 [published Online First: June 2016].
18. Kawashima R, Okita K, Yamazaki R, et al. Reading Aloud and Arithmetic Calculation Improve Frontal Function of People With Dementia. *J Gerontol A Biol Sci Med Sci* 2005;60(3):380–384.
19. Vink AC, Birks JS, Bruinsma MS, et al. Music therapy for people with dementia. *Cochrane Database Syst Rev* 2004;3. doi:10.1002/14651858.CD003477.pub2. [published Online First: 20 October 2003].
20. Ray KD, Mittelman MS. Music therapy: A nonpharmacological approach to the care of agitation and depressive symptoms for nursing home residents with dementia. *Dementia* 2017;16(6):689-710. doi.org/10.1177/1471301215613779 [published Online First: 29 October 2015].
21. Aalbers S, Fusar-Poli L, Freeman RE, et al. Music therapy for depression. *Cochrane Database Syst Rev* 2017;11. doi:10.1002/14651858.CD004517.pub3. [published Online First: 16 November 2017].
22. van der Steen JT, van Soest-Poortvliet MC, van der Wouden JC. Music-based therapeutic interventions for people with dementia. *Cochrane Database Syst Rev* 2017;5. doi:10.1002/14651858.CD003477.pub3. [published Online First: 02 May 2017].
23. Siafarikas N, Selbaek G, Fladby T, et al. Frequency and subgroups of neuropsychiatric symptoms in mild cognitive impairment and different stages of dementia of Alzheimer's Disease. *Int Psychogeriatr* 2018;30(1):103-113. doi:10.1017/S1041610217001879. [published Online First: 20 September 2017].

- 1  
2 24. Baird A, Thompson WF. The Impact of Music on the Self in Dementia. *J Alzheimers*  
3  
4 *Dis* 2018;61(3):827-841. doi:10.3233/JAD-170737. [published Online First: 9 January 2018].  
5
- 6 25. Särkämö T, Tervaniemi M, Laitinen S, et al. Cognitive, emotional, and social benefits of regular  
7  
8 musical activities in early dementia: randomized controlled study. *Gerontologist* 2014;54(4):634-  
9  
10 650. doi: 10.1093/geront/gnt100. [published Online First: 5 September 2013].  
11
- 12 26. Moniz-Cook E, Vernooij-Dassen M, Woods R, et al. A European consensus on outcome  
13  
14 measures for psychosocial intervention research in dementia care. *Aging Ment Health*  
15  
16 2008;12(1):14-29. doi:10.1080/13607860801919850 [published Online First: 25 February 2008].  
17
- 18 27. Kaufer DI, Cummings JL, Ketchel P, et al. Validation of the NPI-Q, a brief clinical form of the  
19  
20 Neuropsychiatric Inventory. *J Neuropsychiatry and Clin Neurosci* 2000;12:233-239.  
21
- 22 28. Wong A, Cheng ST, Lo ES, et al. Validity and reliability of the Neuropsychiatric Inventory  
23  
24 Questionnaire version in patients with stroke or transient ischemic attack having cognitive  
25  
26 impairment. *J Geriatr Psychiatry Neurol* 2014;27(4):247-252. doi:10.1177/0891988714532017.  
27  
28 [published Online First: 24 April 2014].  
29
- 30 29. Fantino B, Moore N. The self-reported Montgomery-Åsberg depression rating scale is a useful  
31  
32 evaluative tool in major depressive disorder. *BMC Psychiatry* 2009;9:26. doi.org/10.1186/1471-  
33  
34 244X-9-26. [published Online First: 27 May 2009].  
35  
36
- 37 30. Logsdon R, Gibbons LE, McCurry SM, et al. Assessing Quality of Life in older adults with  
38  
39 cognitive impairment. *Psychosom Med* 2002;64(3):510–519.  
40
- 41 31. Thorgrimsen L, Selwood A, Spector A, et al. Whose quality of life is it anyway: The validity and  
42  
43 reliability of the Quality of Life-Alzheimer's Disease scale. *Alzheimer Dis Assoc Disor*  
44  
45 2003;17(4):201-208.  
46  
47
- 48 32. Pangman VC, Sloan J, Guse L. An Examination of Psychometric Properties of the Mini-Mental  
49  
50 Status Examination and the Standardized Mini-Mental Status Examination: Implications for Clinical  
51  
52 Practice. *Appl Nurs Res* 2000;13(4):209-213. doi:10.1053/apnr.2000.9231. [published Online First:  
53  
54 November 2000].  
55
- 56 33. Kroenke K, Spitzer RL, Williams JB, et al. The PHQ-9: Validity of a brief depression severity  
57  
58 measure. *J Gen Intern Med* 2001;16(9):606-613.  
59  
60

- 1  
2  
3  
4  
5  
6  
7  
8  
9  
10  
11  
12  
13  
14  
15  
16  
17  
18  
19  
20  
21  
22  
23  
24  
25  
26  
27  
28  
29  
30  
31  
32  
33  
34  
35  
36  
37  
38  
39  
40  
41  
42  
43  
44  
45  
46  
47  
48  
49  
50  
51  
52  
53  
54  
55  
56  
57  
58  
59  
60
34. Cosco K, Kaushal A, Richards M, et al. Resilience measurement in later life: A systematic review and psychometric analysis. *Health Qual Life Outcomes* 2016. doi:10.1186/s12955-016-0418-6 [published Online First: 28 January 2016].
  35. Wagnild G, Young H. Development and psychometric evaluation of the Resilience Scale. *J Nurs Meas* 1993;1(2):165-178.
  36. Vernooij-Dassen MJ, Felling AJ, Brummelkamp E. Assessment of caregiver's competence in dealing with the burden of caregiving for a dementia patient: a Short Sense of Competence Questionnaire (SSCQ) suitable for clinical practice. *J Am Geriatr Soc* 1999;47(2):256-257.
  37. Richardson J, Peacock S, Hawthorne G, et al. Construction of the descriptive system for the assessment of quality of life AQoL-6D utility instrument. *Health Qual Life Outcomes* 2012;10(38). doi:10.1186/1477-7525-10-38. [published Online First: 17 April 2012].
  38. Richardson J, Iezzi A, Khan MA, et al. Cross-national comparison of twelve quality of life instruments: MIC Paper 2 Australia. Center for Health Economics. Victoria, Australia: Monash University 2012.
  39. Spruytte N, Van Audenhove C, Lammertyn F, et al. The quality of the caregiving relationship in informal care for older adults with dementia and chronic psychiatric patients. *Psychol Psychother* 2002;75(3):295-311.
  40. Herdman M, Gudex C, Lloyd A, et al. Development and preliminary testing of the new five-level version of EQ-5D (EQ-5D-5L). *Qual Life Res* 2011;20(10):1727-1736. doi: 10.1007/s11136-011-9903-x. [published Online First: 9 April 2011].
  41. EuroQol Group. EuroQol-a new facility for the measurement of health-related quality of life. *Health Policy* 1990;16(3):199-208.
  42. Orgeta V, Edwards RT, Hounsome B, et al. The use of the EQ-5D as a measure of health-related quality of life in people with dementia and their carers. *Qual Life Res* 2015;24(2):315-324. doi:10.1007/s11136-014-0770-0. [published Online First: 17 August 2014].
  43. Kunz S. Psychometric properties of the EQ-5D in a study of people with mild to moderate dementia." *Qual Life Res* 2010;19(3):425-434. doi:10.1007/s11136-010-9600-1. [published Online First: 10 February 2010].



- 1  
2 44. Arons AM, Krabbe PFM, Schölzel-Dorenbos CJM, et al. Quality of life in dementia: a study on  
3 proxy bias. *BMC Med Res Methodol* 2013;13:110. doi:10.1186/1471-2288-13-110. [published  
4 Online First: September 2013].  
5  
6
- 7  
8 45. Wimo A, Gustavsson A, Jönsson L., et al. Featured Article: Application of Resource Utilization in  
9 Dementia (RUD) instrument in a global setting. *Alzheimers Dement* 2013;9(4):9429-9435.e17.  
10 doi:10.1016/j.jalz.2012.06.008. [published Online First: 9 November 2012].  
11  
12
- 13  
14 46. Mao HF, Kuo CA, Huang WN, et al. Values of the minimal clinically important difference for the  
15 Neuropsychiatric Inventory Questionnaire in individuals with dementia. *J Am Geriatr Soc*  
16 2015;63(7):1448-1452. doi:10.1111/jgs.13473. [published Online First: 5 June 2015].  
17  
18
- 19  
20 47. Giebel CM, Sutcliffe C, Stolt M, et al. Deterioration of basic activities of daily living and their  
21 impact on quality of life across different cognitive stages of dementia: A European study. *Int*  
22 *Psychogeriatr* 2014;26(8):1283-1293. doi:10.1017/S1041610214000775. [published Online First: 1  
23 May 2014].  
24  
25
- 26  
27 48. Howard R, Phillips P, Johnson T, et al. Determining the minimum clinically important differences  
28 for outcomes in the DOMINO trial. *Int J Geriatr Psychiatry* 2011;26:812-817.  
29 doi:10.1002/gps.2607. [published Online First: 16 September 2010].  
30  
31
- 32  
33 49. Liang Z, Zeger S. Longitudinal data analysis of continuous and discrete responses for prepost  
34 designs. *The Indian Journal of Statistics* 2000;62:134-148.  
35  
36
- 37  
38 50. Angrist JD, Imbens GW, Rubin DB. Identification of causal effects using instrumental variables. *J*  
39 *Am Stat Assoc* 1996;91(434):444-455.  
40  
41
- 42  
43 51. Harris PA, Taylor R, Thielke R, et al. Research electronic data capture (REDCap) - A metadata-  
44 driven methodology and workflow process for providing translational research informatics support. *J*  
45 *Biomed Inform* 2009;42:377-381. doi:10.1016/j.jbi.2008.08.010. [published Online First: 30  
46 September 2008].  
47  
48  
49  
50  
51  
52  
53  
54  
55  
56  
57  
58  
59  
60



1  
2  
3  
4  
5  
6  
7  
8  
9  
10  
11  
12  
13  
14  
15  
16  
17  
18  
19  
20  
21  
22  
23  
24  
25  
26  
27  
28  
29  
30  
31  
32  
33  
34  
35  
36  
37  
38  
39  
40  
41  
42  
43  
44  
45  
46  
47  
48  
49

1  
2  
3  
4  
5  
6  
7  
8  
9  
10  
11  
12  
13  
14  
15  
16  
17  
18  
19  
20  
21  
22  
23  
24  
25  
26  
27  
28  
29  
30  
31  
32  
33  
34  
35  
36  
37  
38  
39  
40  
41  
42  
43  
44  
45  
46  
47  
48



|                                                            | Enrolment              | Allocation | Intervention      |                     |                     | Post-Intervention   | Follow-up            |
|------------------------------------------------------------|------------------------|------------|-------------------|---------------------|---------------------|---------------------|----------------------|
| TIMEPOINT                                                  | -1day<br>(-7- -1 days) | 0          | 1day (+/- 7 days) | Day 21 (+/- 7 days) | Day 42 (+/- 7 days) | Day 90 (+/- 7 days) | Day 180 (+/- 7 days) |
| <b>ENROLMENT:</b>                                          |                        |            |                   |                     |                     |                     |                      |
| Eligibility screen                                         | X                      |            |                   |                     |                     |                     |                      |
| Informed consent (or assent)                               | X                      |            |                   |                     |                     |                     |                      |
| Dyad: allocation                                           |                        | X          |                   |                     |                     |                     |                      |
| <b>INTERVENTIONS:</b>                                      |                        |            |                   |                     |                     |                     |                      |
| <i>Music Intervention Training</i>                         |                        |            | X                 | X                   | X                   |                     |                      |
| <i>Reading Intervention Training</i>                       |                        |            | X                 | X                   | X                   |                     |                      |
| <b>ASSESSMENTS:</b>                                        |                        |            |                   |                     |                     |                     |                      |
| <b>PERSON WITH DEMENTIA</b>                                |                        |            |                   |                     |                     |                     |                      |
| <i>sociodemographic information</i>                        | X                      |            |                   |                     |                     |                     |                      |
| <i>MMSE (self)</i>                                         | X                      |            |                   |                     |                     | X                   |                      |
| <i>dementia diagnosis (proxy)</i>                          | X                      |            |                   |                     |                     |                     |                      |
| <i>NPI-Q (proxy)</i>                                       | X                      |            |                   |                     |                     | X                   | X                    |
| <i>MADRS (proxy)</i>                                       | X                      |            |                   |                     |                     | X                   | X                    |
| <i>QoL-AD (proxy and self)</i>                             | X                      |            |                   |                     |                     | X                   | X                    |
| <i>EQ-5D-5L (self and proxy)</i>                           | X                      |            |                   |                     |                     | X                   | X                    |
| <i>Adverse events; death, hospitalisation, death of CG</i> |                        |            | X                 | X                   | X                   | X                   | X                    |
| <b>CAREGIVER</b>                                           |                        |            |                   |                     |                     |                     |                      |
| <i>sociodemographic information</i>                        | X                      |            |                   |                     |                     |                     |                      |
| <i>PHQ-9</i>                                               | X                      |            |                   |                     |                     | X                   | X                    |
| <i>RS-14</i>                                               | X                      |            |                   |                     |                     | X                   | X                    |
| <i>SSCQ</i>                                                | X                      |            |                   |                     |                     | X                   | X                    |
| <i>QPCR</i>                                                | X                      |            |                   |                     |                     | X                   | X                    |
| <i>AQoL-6D</i>                                             | X                      |            |                   |                     |                     | X                   | X                    |
| <i>EQ-5D-5L(self)</i>                                      | X                      |            |                   |                     |                     | X                   | X                    |
| <i>RUD</i>                                                 | X                      |            |                   |                     |                     | X                   | X                    |
| <i>Post-training Questionnaires</i>                        |                        |            | X                 | X                   | X                   |                     |                      |
| <i>Interviews</i>                                          |                        |            |                   |                     |                     | X                   |                      |
| <i>Diary (5xweekly diary entries for MI and RI)</i>        |                        |            | X                 | X                   | X                   | X                   |                      |
| <i>Adverse events; death, hospitalisation</i>              |                        |            | X                 | X                   | X                   | X                   | X                    |

**Figure 3. Schedule of enrolment, interventions, and assessments**

RUD - Resource Utilization in Dementia, MMSE -MiniMental State Examination Score; ICD-10 – International Classification of Diseases-10; NPI-Q – Neuropsychiatric Inventory; MADRS - Montgomery Asberg Depression Rating Scale; QoL-AD - Quality of Life-Alzheimer’s Disease; PHQ-9 - Patient Health Questionnaire-9; RS - Resilience Scale; SSCQ - Short Sense of Competence Questionnaire; AQoL-6D - Assessment of Quality of Life-6D instrument; QPCR - Quality of Caregiver-Patient Relationship; Quality Adjusted Life-Years – EQ-5D-5L The EuroQol instrument

1  
2  
3  
4  
5  
6  
7  
8  
9  
10  
11  
12  
13  
14  
15  
16  
17  
18  
19  
20  
21  
22  
23  
24  
25  
26  
27  
28  
29  
30  
31  
32  
33  
34  
35  
36  
37  
38  
39  
40  
41  
42  
43  
44  
45  
46

SPIRIT 2013 Checklist: Recommended items to address in a clinical trial protocol and related documents\*

| Section/item               | Item No | Description                                                                                                                                                                                                                                                                              | Addressed on page number |
|----------------------------|---------|------------------------------------------------------------------------------------------------------------------------------------------------------------------------------------------------------------------------------------------------------------------------------------------|--------------------------|
| Administrative information |         |                                                                                                                                                                                                                                                                                          |                          |
| Title                      | 1       | Descriptive title identifying the study design, population, interventions, and, if applicable, trial acronym                                                                                                                                                                             | _____ 1                  |
| Trial registration         | 2a      | Trial identifier and registry name. If not yet registered, name of intended registry                                                                                                                                                                                                     | _____ 1                  |
|                            | 2b      | All items from the World Health Organization Trial Registration Data Set                                                                                                                                                                                                                 | _____ 2                  |
| Protocol version           | 3       | Date and version identifier                                                                                                                                                                                                                                                              | _____ n/a original       |
| Funding                    | 4       | Sources and types of financial, material, and other support                                                                                                                                                                                                                              | _____ 1                  |
| Roles and responsibilities | 5a      | Names, affiliations, and roles of protocol contributors                                                                                                                                                                                                                                  | _____ 1                  |
|                            | 5b      | Name and contact information for the trial sponsor                                                                                                                                                                                                                                       | _____ 1-2                |
|                            | 5c      | Role of study sponsor and funders, if any, in study design; collection, management, analysis, and interpretation of data; writing of the report; and the decision to submit the report for publication, including whether they will have ultimate authority over any of these activities | _____ n/a                |
|                            | 5d      | Composition, roles, and responsibilities of the coordinating centre, steering committee, endpoint adjudication committee, data management team, and other individuals or groups overseeing the trial, if applicable (see Item 21a for data monitoring committee)                         | _____ 16-17              |

|    |                                                    |     |                                                                                                                              |              |
|----|----------------------------------------------------|-----|------------------------------------------------------------------------------------------------------------------------------|--------------|
| 1  | Introduction                                       |     |                                                                                                                              |              |
| 2  |                                                    |     |                                                                                                                              |              |
| 3  | Background and                                     | 6a  | Description of research question and justification for undertaking the trial, including summary of relevant studies          | _____4-6     |
| 4  | rationale                                          |     | (published and unpublished) examining benefits and harms for each intervention                                               |              |
| 5  |                                                    |     |                                                                                                                              |              |
| 6  |                                                    | 6b  | Explanation for choice of comparators                                                                                        | _____6       |
| 7  |                                                    |     |                                                                                                                              |              |
| 8  | Objectives                                         | 7   | Specific objectives or hypotheses                                                                                            | _____7       |
| 9  |                                                    |     |                                                                                                                              |              |
| 10 | Trial design                                       | 8   | Description of trial design including type of trial (eg, parallel group, crossover, factorial, single group), allocation     |              |
| 11 |                                                    |     | ratio, and framework (eg, superiority, equivalence, noninferiority, exploratory)                                             | _____6       |
| 12 |                                                    |     |                                                                                                                              |              |
| 13 |                                                    |     |                                                                                                                              |              |
| 14 | Methods: Participants, interventions, and outcomes |     |                                                                                                                              |              |
| 15 |                                                    |     |                                                                                                                              |              |
| 16 | Study setting                                      | 9   | Description of study settings (eg, community clinic, academic hospital) and list of countries where data will be             | _____7-8     |
| 17 |                                                    |     | collected. Reference to where list of study sites can be obtained                                                            |              |
| 18 |                                                    |     |                                                                                                                              |              |
| 19 | Eligibility criteria                               | 10  | Inclusion and exclusion criteria for participants. If applicable, eligibility criteria for study centres and individuals who | _____7-8     |
| 20 |                                                    |     | will perform the interventions (eg, surgeons, psychotherapists)                                                              |              |
| 21 |                                                    |     |                                                                                                                              |              |
| 22 | Interventions                                      | 11a | Interventions for each group with sufficient detail to allow replication, including how and when they will be                | _____8-10    |
| 23 |                                                    |     | administered                                                                                                                 |              |
| 24 |                                                    | 11b | Criteria for discontinuing or modifying allocated interventions for a given trial participant (eg, drug dose change in       | _____10      |
| 25 |                                                    |     | response to harms, participant request, or improving/worsening disease)                                                      |              |
| 26 |                                                    | 11c | Strategies to improve adherence to intervention protocols, and any procedures for monitoring adherence (eg, drug             | _____8-9, 13 |
| 27 |                                                    |     | tablet return, laboratory tests)                                                                                             |              |
| 28 |                                                    | 11d | Relevant concomitant care and interventions that are permitted or prohibited during the trial                                | _____7-9     |
| 29 |                                                    |     |                                                                                                                              |              |
| 30 | Outcomes                                           | 12  | Primary, secondary, and other outcomes, including the specific measurement variable (eg, systolic blood pressure),           |              |
| 31 |                                                    |     | analysis metric (eg, change from baseline, final value, time to event), method of aggregation (eg, median, proportion),      | _____10-13   |
| 32 |                                                    |     | and time point for each outcome. Explanation of the clinical relevance of chosen efficacy and harm outcomes is               |              |
| 33 |                                                    |     | strongly recommended                                                                                                         |              |
| 34 |                                                    |     |                                                                                                                              |              |
| 35 | Participant timeline                               | 13  | Time schedule of enrolment, interventions (including any run-ins and washouts), assessments, and visits for                  | _____Fig. 3  |
| 36 |                                                    |     | participants. A schematic diagram is highly recommended (see Figure)                                                         |              |
| 37 |                                                    |     |                                                                                                                              |              |
| 38 |                                                    |     |                                                                                                                              |              |
| 39 |                                                    |     |                                                                                                                              |              |
| 40 |                                                    |     |                                                                                                                              |              |
| 41 |                                                    |     |                                                                                                                              |              |
| 42 |                                                    |     |                                                                                                                              |              |
| 43 |                                                    |     |                                                                                                                              |              |
| 44 |                                                    |     |                                                                                                                              |              |
| 45 |                                                    |     |                                                                                                                              |              |
| 46 |                                                    |     |                                                                                                                              |              |

1 Sample size 14 Estimated number of participants needed to achieve study objectives and how it was determined, including clinical and \_\_\_\_\_ 14  
2 statistical assumptions supporting any sample size calculations  
3  
4 Recruitment 15 Strategies for achieving adequate participant enrolment to reach target sample size \_\_\_\_\_ 17  
5  
6  
7 Methods: Assignment of interventions (for controlled trials)  
8  
9 Allocation:  
10 Sequence 16a Method of generating the allocation sequence (eg, computer-generated random numbers), and list of any factors for \_\_\_\_\_ 14  
11 generation stratification. To reduce predictability of a random sequence, details of any planned restriction (eg, blocking) should  
12 be provided in a separate document that is unavailable to those who enrol participants or assign interventions  
13  
14 Allocation 16b Mechanism of implementing the allocation sequence (eg, central telephone; sequentially numbered, opaque, sealed \_\_\_\_\_ 14  
15 concealment envelopes), describing any steps to conceal the sequence until interventions are assigned  
16 mechanism  
17  
18 Implementation 16c Who will generate the allocation sequence, who will enrol participants, and who will assign participants to \_\_\_\_\_ 14  
19 interventions  
20  
21 Blinding (masking) 17a Who will be blinded after assignment to interventions (eg, trial participants, care providers, outcome assessors, data \_\_\_\_\_ 14-15  
22 analysts), and how  
23  
24 17b If blinded, circumstances under which unblinding is permissible, and procedure for revealing a participant’s allocated \_\_\_\_\_ N/A  
25 intervention during the trial  
26  
27  
28  
29  
30 Methods: Data collection, management, and analysis  
31  
32 Data collection 18a Plans for assessment and collection of outcome, baseline, and other trial data, including any related processes to \_\_\_\_\_ 10-13  
33 methods promote data quality (eg, duplicate measurements, training of assessors) and a description of study instruments (eg,  
34 questionnaires, laboratory tests) along with their reliability and validity, if known. Reference to where data collection  
35 forms can be found, if not in the protocol  
36  
37 18b Plans to promote participant retention and complete follow-up, including list of any outcome data to be collected for \_\_\_\_\_ N/A  
38 participants who discontinue or deviate from intervention protocols  
39  
40  
41  
42  
43  
44  
45  
46

|    |                          |     |                                                                                                                                                                                                                                                                                                                                       |             |
|----|--------------------------|-----|---------------------------------------------------------------------------------------------------------------------------------------------------------------------------------------------------------------------------------------------------------------------------------------------------------------------------------------|-------------|
| 1  | Data management          | 19  | Plans for data entry, coding, security, and storage, including any related processes to promote data quality (eg, double data entry; range checks for data values). Reference to where details of data management procedures can be found, if not in the protocol                                                                     | _____16-18  |
| 2  |                          |     |                                                                                                                                                                                                                                                                                                                                       |             |
| 3  |                          |     |                                                                                                                                                                                                                                                                                                                                       |             |
| 4  |                          |     |                                                                                                                                                                                                                                                                                                                                       |             |
| 5  | Statistical methods      | 20a | Statistical methods for analysing primary and secondary outcomes. Reference to where other details of the statistical analysis plan can be found, if not in the protocol                                                                                                                                                              | _____15-16  |
| 6  |                          |     |                                                                                                                                                                                                                                                                                                                                       |             |
| 7  |                          |     |                                                                                                                                                                                                                                                                                                                                       |             |
| 8  |                          | 20b | Methods for any additional analyses (eg, subgroup and adjusted analyses)                                                                                                                                                                                                                                                              | _____15-16  |
| 9  |                          |     |                                                                                                                                                                                                                                                                                                                                       |             |
| 10 |                          | 20c | Definition of analysis population relating to protocol non-adherence (eg, as randomised analysis), and any statistical methods to handle missing data (eg, multiple imputation)                                                                                                                                                       | _____15-17  |
| 11 |                          |     |                                                                                                                                                                                                                                                                                                                                       |             |
| 12 |                          |     |                                                                                                                                                                                                                                                                                                                                       |             |
| 13 |                          |     |                                                                                                                                                                                                                                                                                                                                       |             |
| 14 | Methods: Monitoring      |     |                                                                                                                                                                                                                                                                                                                                       |             |
| 15 |                          |     |                                                                                                                                                                                                                                                                                                                                       |             |
| 16 | Data monitoring          | 21a | Composition of data monitoring committee (DMC); summary of its role and reporting structure; statement of whether it is independent from the sponsor and competing interests; and reference to where further details about its charter can be found, if not in the protocol. Alternatively, an explanation of why a DMC is not needed | _____17     |
| 17 |                          |     |                                                                                                                                                                                                                                                                                                                                       |             |
| 18 |                          |     |                                                                                                                                                                                                                                                                                                                                       |             |
| 19 |                          |     |                                                                                                                                                                                                                                                                                                                                       |             |
| 20 |                          |     |                                                                                                                                                                                                                                                                                                                                       |             |
| 21 |                          | 21b | Description of any interim analyses and stopping guidelines, including who will have access to these interim results and make the final decision to terminate the trial                                                                                                                                                               | _____N/A 17 |
| 22 |                          |     |                                                                                                                                                                                                                                                                                                                                       |             |
| 23 |                          |     |                                                                                                                                                                                                                                                                                                                                       |             |
| 24 | Harms                    | 22  | Plans for collecting, assessing, reporting, and managing solicited and spontaneously reported adverse events and other unintended effects of trial interventions or trial conduct                                                                                                                                                     | _____10, 17 |
| 25 |                          |     |                                                                                                                                                                                                                                                                                                                                       |             |
| 26 |                          |     |                                                                                                                                                                                                                                                                                                                                       |             |
| 27 | Auditing                 | 23  | Frequency and procedures for auditing trial conduct, if any, and whether the process will be independent from investigators and the sponsor                                                                                                                                                                                           | _____16-17  |
| 28 |                          |     |                                                                                                                                                                                                                                                                                                                                       |             |
| 29 |                          |     |                                                                                                                                                                                                                                                                                                                                       |             |
| 30 |                          |     |                                                                                                                                                                                                                                                                                                                                       |             |
| 31 | Ethics and dissemination |     |                                                                                                                                                                                                                                                                                                                                       |             |
| 32 |                          |     |                                                                                                                                                                                                                                                                                                                                       |             |
| 33 | Research ethics approval | 24  | Plans for seeking research ethics committee/institutional review board (REC/IRB) approval                                                                                                                                                                                                                                             | _____18     |
| 34 |                          |     |                                                                                                                                                                                                                                                                                                                                       |             |
| 35 |                          |     |                                                                                                                                                                                                                                                                                                                                       |             |
| 36 | Protocol amendments      | 25  | Plans for communicating important protocol modifications (eg, changes to eligibility criteria, outcomes, analyses) to relevant parties (eg, investigators, REC/IRBs, trial participants, trial registries, journals, regulators)                                                                                                      | _____16-18  |
| 37 |                          |     |                                                                                                                                                                                                                                                                                                                                       |             |
| 38 |                          |     |                                                                                                                                                                                                                                                                                                                                       |             |
| 39 | Consent or assent        | 26a | Who will obtain informed consent or assent from potential trial participants or authorised surrogates, and how (see Item 32)                                                                                                                                                                                                          | _____14     |
| 40 |                          |     |                                                                                                                                                                                                                                                                                                                                       |             |
| 41 |                          |     |                                                                                                                                                                                                                                                                                                                                       |             |
| 42 |                          |     |                                                                                                                                                                                                                                                                                                                                       |             |
| 43 |                          |     |                                                                                                                                                                                                                                                                                                                                       |             |
| 44 |                          |     |                                                                                                                                                                                                                                                                                                                                       |             |
| 45 |                          |     |                                                                                                                                                                                                                                                                                                                                       |             |
| 46 |                          |     |                                                                                                                                                                                                                                                                                                                                       |             |



|    |                               |     |                                                                                                                                                                                                                                                                                     |       |       |
|----|-------------------------------|-----|-------------------------------------------------------------------------------------------------------------------------------------------------------------------------------------------------------------------------------------------------------------------------------------|-------|-------|
| 1  |                               | 26b | Additional consent provisions for collection and use of participant data and biological specimens in ancillary studies, if applicable                                                                                                                                               | _____ | N/A   |
| 2  |                               |     |                                                                                                                                                                                                                                                                                     |       |       |
| 3  |                               |     |                                                                                                                                                                                                                                                                                     |       |       |
| 4  | Confidentiality               | 27  | How personal information about potential and enrolled participants will be collected, shared, and maintained in order to protect confidentiality before, during, and after the trial                                                                                                | _____ | 17-18 |
| 5  |                               |     |                                                                                                                                                                                                                                                                                     |       |       |
| 6  |                               |     |                                                                                                                                                                                                                                                                                     |       |       |
| 7  | Declaration of interests      | 28  | Financial and other competing interests for principal investigators for the overall trial and each study site                                                                                                                                                                       | _____ | 2     |
| 8  |                               |     |                                                                                                                                                                                                                                                                                     |       |       |
| 9  |                               |     |                                                                                                                                                                                                                                                                                     |       |       |
| 10 | Access to data                | 29  | Statement of who will have access to the final trial dataset, and disclosure of contractual agreements that limit such access for investigators                                                                                                                                     | _____ | 18-19 |
| 11 |                               |     |                                                                                                                                                                                                                                                                                     |       |       |
| 12 |                               |     |                                                                                                                                                                                                                                                                                     |       |       |
| 13 | Ancillary and post-trial care | 30  | Provisions, if any, for ancillary and post-trial care, and for compensation to those who suffer harm from trial participation                                                                                                                                                       | _____ | N/A   |
| 14 |                               |     |                                                                                                                                                                                                                                                                                     |       |       |
| 15 |                               |     |                                                                                                                                                                                                                                                                                     |       |       |
| 16 |                               |     |                                                                                                                                                                                                                                                                                     |       |       |
| 17 | Dissemination policy          | 31a | Plans for investigators and sponsor to communicate trial results to participants, healthcare professionals, the public, and other relevant groups (eg, via publication, reporting in results databases, or other data sharing arrangements), including any publication restrictions | _____ | 18-19 |
| 18 |                               |     |                                                                                                                                                                                                                                                                                     |       |       |
| 19 |                               |     |                                                                                                                                                                                                                                                                                     |       |       |
| 20 |                               |     |                                                                                                                                                                                                                                                                                     |       |       |
| 21 |                               | 31b | Authorship eligibility guidelines and any intended use of professional writers                                                                                                                                                                                                      | _____ | N/A   |
| 22 |                               |     |                                                                                                                                                                                                                                                                                     |       |       |
| 23 |                               | 31c | Plans, if any, for granting public access to the full protocol, participant-level dataset, and statistical code                                                                                                                                                                     | _____ | 19    |
| 24 |                               |     |                                                                                                                                                                                                                                                                                     |       |       |
| 25 |                               |     |                                                                                                                                                                                                                                                                                     |       |       |
| 26 | Appendices                    |     |                                                                                                                                                                                                                                                                                     |       |       |
| 27 |                               |     |                                                                                                                                                                                                                                                                                     |       |       |
| 28 | Informed consent materials    | 32  | Model consent form and other related documentation given to participants and authorised surrogates                                                                                                                                                                                  | _____ | N/A   |
| 29 |                               |     |                                                                                                                                                                                                                                                                                     |       |       |
| 30 |                               |     |                                                                                                                                                                                                                                                                                     |       |       |
| 31 | Biological specimens          | 33  | Plans for collection, laboratory evaluation, and storage of biological specimens for genetic or molecular analysis in the current trial and for future use in ancillary studies, if applicable                                                                                      | _____ | 19    |
| 32 |                               |     |                                                                                                                                                                                                                                                                                     |       |       |
| 33 |                               |     |                                                                                                                                                                                                                                                                                     |       |       |

\*It is strongly recommended that this checklist be read in conjunction with the SPIRIT 2013 Explanation & Elaboration for important clarification on the items. Amendments to the protocol should be tracked and dated. The SPIRIT checklist is copyrighted by the SPIRIT Group under the Creative Commons “Attribution-NonCommercial-NoDerivs 3.0 Unported” license.
